# Supplementary material for: Proteomic analysis of human iPSC derived neural stem cells and motor neurons identifies proteasome structural alterations.
Source: Preprints.org preprint supplement (doi:10.20944/preprints202310.0391.v1), 2023-10-09
Supplement: Supplementary file 1 [file supplementary]

## Sheet: iPSC_proteomics_fulltable
Gene name	Student's T-test Significant HFF_iPSC_DH	Student's T-test Significant HFF_iPSC_MH	Student's T-test Significant iPSC_DH_iPSC_MH	Student's T-test Significant iPSC_NSC	Student's T-test significant_	Student's T-test Significant iPSC_DH_NSC_DH	MHC-I antigen processing and presentation	Student's T-test Significant HFF_iPSC	Student's T-test Significant HFF_NSC	GOMF name	GOBP slim name	GOCC slim name	Keywords	NrOfStrippedSequencesUsedForQuantification	-Log Student's T-test p-value HFF_iPSC_DH	Student's T-test q-value HFF_iPSC_DH	Student's T-test Difference HFF_iPSC_DH	Student's T-test Test statistic HFF_iPSC_DH	-Log Student's T-test p-value HFF_iPSC_MH	Student's T-test q-value HFF_iPSC_MH	Student's T-test Difference HFF_iPSC_MH	Student's T-test Test statistic HFF_iPSC_MH	-Log Student's T-test p-value iPSC_DH_iPSC_MH	Student's T-test q-value iPSC_DH_iPSC_MH	Student's T-test Difference iPSC_DH_iPSC_MH	Student's T-test Test statistic iPSC_DH_iPSC_MH	-Log Student's T-test p-value iPSC_NSC	Student's T-test q-value iPSC_NSC	Student's T-test Difference iPSC_NSC	Student's T-test Test statistic iPSC_NSC	-Log Student's T-test p-value iPSC_DH_NSC_DH	Student's T-test q-value iPSC_DH_NSC_DH	Student's T-test Difference iPSC_DH_NSC_DH	Student's T-test Test statistic iPSC_DH_NSC_DH	-Log Student's T-test p-value HFF_iPSC	Student's T-test q-value HFF_iPSC	Student's T-test Difference HFF_iPSC	Student's T-test Test statistic HFF_iPSC	-Log Student's T-test p-value HFF_NSC	Student's T-test q-value HFF_NSC	Student's T-test Difference HFF_NSC	Student's T-test Test statistic HFF_NSC	PG.FASTAHeader	PG.ProteinAccessions	PG.ProteinDescriptions	PG.ProteinNames	HFF1	HFF2	HFF3
ACAA1	+	+						+	+	acetyl-CoA C-acyltransferase activity;acyl-CoA oxidase activity;C-acyltransferase activity;catalytic activity;oxidoreductase activity;oxidoreductase activity, acting on the CH-CH group of donors;oxidoreductase activity, acting on the CH-CH group of donors, oxygen as acceptor;palmitoyl-CoA oxidase activity;transferase activity;transferase activity, transferring acyl groups;transferase activity, tr…	catabolic process;cellular ketone metabolic process;cellular lipid metabolic process;cellular metabolic process;cellular process;lipid metabolic process;metabolic process;organic acid metabolic process;primary metabolic process;small molecule metabolic process	cell part;intracellular membrane-bounded organelle;intracellular organelle;membrane;microbody;organelle;peroxisome	3D-structure;Acyltransferase;Alternativesplicing;Completeproteome;Fattyacidmetabolism;Lipidmetabolism;Peroxisome;Phosphoprotein;Polymorphism;Referenceproteome;Transferase;Transitpeptide	8	1.24432	0.00265296	4.5745	1.67801	1.01855	0.0179614	4.15662	1.42566	0.167744	0.761626	-0.41788	-0.215414	0.643353	0.522949	-1.19806	-0.628781	0.606168	0.209961	-1.407	-0.689582	1.9512	0.029505	4.36556	1.91656	0.738539	0.0179406	3.1675	1.06764	>sp|P09110|THIK_HUMAN 3-ketoacyl-CoA thiolase, peroxisomal OS=Homo sapiens GN=ACAA1 PE=1 SV=2	P09110	3-ketoacyl-CoA thiolase, peroxisomal	THIK_HUMAN	22.5032	22.5435	17.4298
ACADVL	+	+						+	+	acyl-CoA dehydrogenase activity;binding;catalytic activity;coenzyme binding;cofactor binding;flavin adenine dinucleotide binding;long-chain-acyl-CoA dehydrogenase activity;oxidoreductase activity;oxidoreductase activity, acting on the CH-CH group of donors	biological regulation;catabolic process;cell differentiation;cellular ketone metabolic process;cellular lipid metabolic process;cellular metabolic process;cellular process;developmental process;generation of precursor metabolites and energy;homeostatic process;lipid metabolic process;macromolecule metabolic process;metabolic process;multicellular organismal process;organic acid metabolic process;…	cell part;cytoplasm;intracellular membrane-bounded organelle;intracellular non-membrane-bounded organelle;intracellular organelle;membrane;mitochondrion;nucleolus;nucleus;organelle	3D-structure;Acetylation;Alternativesplicing;Cardiomyopathy;Completeproteome;Diseasemutation;FAD;Fattyacidmetabolism;Flavoprotein;Isopeptidebond;Lipidmetabolism;Membrane;Mitochondrion;Mitochondrioninnermembrane;Oxidoreductase;Polymorphism;Referenceproteome;S-nitrosylation;Transitpeptide;Ublconjugation	26	2.67626	0.0205342	1.17405	1.00693	3.99648	0.0165724	1.62253	1.46889	1.32388	0.578918	0.448479	0.387094	0.80647	0.716407	-0.339125	-0.27947	0.19373	0.863444	-0.114885	-0.0935922	3.84562	0.0662651	1.39829	1.17743	2.26359	0.0404945	1.05916	0.88723	>sp|P49748|ACADV_HUMAN Very long-chain specific acyl-CoA dehydrogenase, mitochondrial OS=Homo sapiens GN=ACADVL PE=1 SV=1	P49748	Very long-chain specific acyl-CoA dehydrogenase, mitochondrial	ACADV_HUMAN	20.2719	20.1533	19.9902
ACTN1	+	+				+		+	+	binding;calcium ion binding;cation binding;cytoskeletal protein binding;double-stranded RNA binding;integrin binding;ion binding;ion channel binding;ligand-dependent nuclear receptor transcription coactivator activity;metal ion binding;nucleic acid binding;protein binding;protein binding transcription factor activity;protein complex binding;receptor binding;RNA binding;transcription coactivator a…	biological regulation;cell activation;cell junction organization;cellular component assembly;cellular component organization;cellular process;coagulation;cytoskeleton organization;establishment of localization;exocytosis;extracellular matrix organization;extracellular structure organization;multicellular organismal process;organelle organization;regulation of body fluid levels;secretion;transport…	cell part;cell projection;cytoplasm;cytoskeleton;cytosol;extracellular organelle;extracellular region;extracellular space;intracellular membrane-bounded organelle;intracellular non-membrane-bounded organelle;intracellular organelle;membrane;neuron projection;nucleus;organelle;plasma membrane;pseudopodium;vesicle	3D-structure;Acetylation;Actin-binding;Alternativesplicing;Calcium;Celljunction;Cellmembrane;Cellprojection;Completeproteome;Cytoplasm;Cytoskeleton;Directproteinsequencing;Diseasemutation;Membrane;Metal-binding;Phosphoprotein;Polymorphism;Referenceproteome;Repeat	34	3.96159	0.00960844	1.34986	1.23976	3.71707	0.0281936	1.3525	1.22656	0.00697107	1	0.00263723	0.00234586	5.44474	0.34086	1.13657	1.04559	3.59397	0.0785077	1.13789	1.0412	6.01797	0.0543816	1.35118	1.24512	5.66145	0.00142105	2.48775	2.34441	>sp|P12814|ACTN1_HUMAN Alpha-actinin-1 OS=Homo sapiens GN=ACTN1 PE=1 SV=2	P12814	Alpha-actinin-1	ACTN1_HUMAN	23.66	23.5601	23.5325
ACTN4	+	+						+	+	actin binding;actin filament binding;binding;calcium ion binding;cation binding;cytoskeletal protein binding;hormone receptor binding;identical protein binding;integrin binding;ion binding;ligand-dependent nuclear receptor transcription coactivator activity;metal ion binding;nuclear hormone receptor binding;nucleoside binding;protein binding;protein binding transcription factor activity;protein c…	biological regulation;cell activation;cell junction organization;cellular component assembly;cellular component organization;cellular process;coagulation;cytoskeleton organization;establishment of localization;exocytosis;multicellular organismal process;organelle organization;protein transport;regulation of body fluid levels;regulation of transport;response to chemical stimulus;response to stimul…	cell part;cell projection;cytoplasm;cytoskeleton;extracellular organelle;extracellular region;extracellular space;intracellular membrane-bounded organelle;intracellular non-membrane-bounded organelle;intracellular organelle;macromolecular complex;neuron projection;nucleus;organelle;protein complex;pseudopodium;ribonucleoprotein complex;vesicle	3D-structure;Acetylation;Actin-binding;Alternativesplicing;Calcium;Celljunction;Completeproteome;Cytoplasm;Diseasemutation;Isopeptidebond;Metal-binding;Nucleus;Phosphoprotein;Proteintransport;Referenceproteome;Repeat;Transport;Ublconjugation	43	4.56724	0.00350843	1.76287	1.62995	3.99069	0.0206149	1.48109	1.3516	1.32174	0.715221	-0.281781	-0.256209	3.3183	0.521911	0.700145	0.628292	2.96077	0.312633	0.559255	0.524381	5.583	0.0363714	1.62198	1.45018	5.56532	0.00232	2.32212	2.19001	>sp|O43707|ACTN4_HUMAN Alpha-actinin-4 OS=Homo sapiens GN=ACTN4 PE=1 SV=2	O43707	Alpha-actinin-4	ACTN4_HUMAN	24.0687	23.966	23.8813
ACTR2	+	+						+	+	adenyl nucleotide binding;adenyl ribonucleotide binding;ATP binding;binding;nucleotide binding;purine nucleotide binding;purine ribonucleoside triphosphate binding;purine ribonucleotide binding;ribonucleotide binding;structural constituent of cytoskeleton;structural molecule activity	anatomical structure formation involved in morphogenesis;biological regulation;cell division;cellular component assembly;cellular component movement;cellular component organization;cellular localization;cellular process;cytokinesis;cytoskeleton organization;developmental process;establishment of localization;establishment or maintenance of cell polarity;immune system process;localization;locomoti…	cell part;cell projection;cytoplasm;cytoskeleton;cytosol;extracellular organelle;intracellular non-membrane-bounded organelle;intracellular organelle;macromolecular complex;membrane;organelle;protein complex;vesicle	Acetylation;Actin-binding;Alternativesplicing;ATP-binding;Cellprojection;Completeproteome;Cytoplasm;Cytoskeleton;Directproteinsequencing;Nucleotide-binding;Referenceproteome	19	4.16364	0.00884668	1.43007	1.3197	5.10294	0.020524	1.42536	1.35961	0.0165519	0.998604	-0.00470797	-0.00430197	0.389095	0.906552	0.102022	0.0914191	0.22815	0.879406	0.0996679	0.0851104	7.1058	0.0429972	1.42771	1.34368	3.2763	0.00743761	1.52974	1.32948	>sp|P61160|ARP2_HUMAN Actin-related protein 2 OS=Homo sapiens GN=ACTR2 PE=1 SV=1	P61160	Actin-related protein 2	ARP2_HUMAN	21.0065	21.0286	21.057
ACTR3	+	+						+	+	adenyl nucleotide binding;adenyl ribonucleotide binding;ATP binding;binding;nucleotide binding;purine nucleotide binding;purine ribonucleoside triphosphate binding;purine ribonucleotide binding;ribonucleotide binding;structural constituent of cytoskeleton;structural molecule activity	anatomical structure morphogenesis;biological regulation;cell division;cellular component morphogenesis;cellular component movement;cellular component organization;cellular localization;cellular process;cytokinesis;cytoskeleton organization;developmental process;establishment of localization;establishment or maintenance of cell polarity;immune system process;localization;locomotion;organelle loca…	cell part;cell projection;cytoskeleton;cytosol;extracellular organelle;intracellular non-membrane-bounded organelle;intracellular organelle;macromolecular complex;membrane;organelle;protein complex;synapse;vesicle	Acetylation;Actin-binding;ATP-binding;Cellprojection;Ciliumbiogenesis/degradation;Completeproteome;Cytoplasm;Cytoskeleton;Directproteinsequencing;Nucleotide-binding;Referenceproteome	15	4.06354	0.00793082	1.52018	1.38926	3.43823	0.0199008	1.59119	1.39292	0.186659	0.942558	0.0710093	0.0620004	0.677274	0.83655	0.179754	0.159029	0.654903	0.704817	0.215258	0.187389	5.77816	0.0378981	1.55569	1.40615	3.54421	0.00559173	1.73544	1.51456	>sp|P61158|ARP3_HUMAN Actin-related protein 3 OS=Homo sapiens GN=ACTR3 PE=1 SV=3	P61158	Actin-related protein 3	ARP3_HUMAN	21.6015	21.552	21.3916
ADAR	+	+						+		adenosine deaminase activity;binding;catalytic activity;cation binding;deaminase activity;DNA binding;double-stranded RNA adenosine deaminase activity;hydrolase activity;hydrolase activity, acting on carbon-nitrogen (but not peptide) bonds;hydrolase activity, acting on carbon-nitrogen (but not peptide) bonds, in cyclic amidines;ion binding;metal ion binding;nucleic acid binding	anatomical structure development;biological regulation;cell differentiation;cellular component assembly;cellular component organization;cellular macromolecular complex assembly;cellular metabolic process;cellular nitrogen compound metabolic process;cellular process;developmental process;embryo development;establishment of localization;immune system process;macromolecular complex assembly;macromol…	cell part;cytoplasm;intracellular membrane-bounded organelle;intracellular non-membrane-bounded organelle;intracellular organelle;membrane;nucleolus;nucleoplasm;nucleus;organelle	3D-structure;Aicardi-Goutieressyndrome;Alternativepromoterusage;Alternativesplicing;Antiviraldefense;Completeproteome;Cytoplasm;Directproteinsequencing;Diseasemutation;DNA-binding;Hydrolase;Immunity;Innateimmunity;Isopeptidebond;Metal-binding;mRNAprocessing;Nucleus;Phosphoprotein;Polymorphism;Referenceproteome;Repeat;RNA-binding;RNA-mediatedgenesilencing;Ublconjugation;Zinc	31	2.18345	0.0168258	-1.34044	-1.06536	1.89077	0.0666806	-1.22964	-0.95515	0.278689	0.900581	0.110806	0.095533	2.02827	0.585875	0.576769	0.496118	1.50303	0.312903	0.632172	0.529205	3.48662	0.0899078	-1.28504	-1.07363	1.08093	0.171299	-0.708271	-0.541479	>sp|P55265|DSRAD_HUMAN Double-stranded RNA-specific adenosine deaminase OS=Homo sapiens GN=ADAR PE=1 SV=4	P55265	Double-stranded RNA-specific adenosine deaminase	DSRAD_HUMAN	18.2603	19.0144	18.2767
ADD3	+	+						+	+	structural constituent of cytoskeleton;structural molecule activity	cellular process;establishment of localization;transmembrane transport;transport	cell cortex;cell part;chromosome;cytoplasm;cytoskeleton;cytosol;intracellular non-membrane-bounded organelle;intracellular organelle;membrane;nuclear chromosome;nucleoplasm;organelle;plasma membrane	Acetylation;Actin-binding;Alternativesplicing;Calmodulin-binding;Cellmembrane;Completeproteome;Cytoplasm;Cytoskeleton;Membrane;Phosphoprotein;Referenceproteome;Ublconjugation	16	3.21002	0.0088877	1.5192	1.31464	2.4369	0.0214286	1.71362	1.33774	0.240858	0.842891	0.194422	0.147481	0.713729	0.715296	-0.346482	-0.279246	0.497757	0.674181	-0.249271	-0.204549	3.82128	0.0437021	1.61641	1.32625	2.87	0.0162235	1.26993	1.09521	>sp|Q9UEY8|ADDG_HUMAN Gamma-adducin OS=Homo sapiens GN=ADD3 PE=1 SV=1	Q9UEY8	Gamma-adducin	ADDG_HUMAN	19.157	19.1389	19.0578
ADI1	+	+						+	+	acireductone dioxygenase [iron(II)-requiring] activity;binding;catalytic activity;cation binding;dioxygenase activity;ion binding;iron ion binding;metal ion binding;oxidoreductase activity;oxidoreductase activity, acting on single donors with incorporation of molecular oxygen;oxidoreductase activity, acting on single donors with incorporation of molecular oxygen, incorporation of two atoms of oxy…	amine metabolic process;biosynthetic process;cellular amino acid metabolic process;cellular ketone metabolic process;cellular metabolic compound salvage;cellular metabolic process;cellular nitrogen compound metabolic process;cellular process;metabolic process;nitrogen compound metabolic process;organic acid metabolic process;primary metabolic process;small molecule metabolic process;sulfur compou…	cell part;cytoplasm;cytosol;Golgi apparatus;intracellular membrane-bounded organelle;intracellular organelle;membrane;nucleoplasm;nucleus;organelle;plasma membrane	Alternativesplicing;Amino-acidbiosynthesis;Cellmembrane;Completeproteome;Cytoplasm;Dioxygenase;Directproteinsequencing;Iron;Membrane;Metal-binding;Methioninebiosynthesis;Nucleus;Oxidoreductase;Referenceproteome	7	3.05488	0.00739292	1.70786	1.43286	3.63857	0.0117263	2.00732	1.73109	0.604127	0.729449	0.299459	0.24504	1.01947	0.68419	-0.397528	-0.329488	0.441227	0.681505	-0.247798	-0.199668	4.71101	0.032781	1.85759	1.5701	2.85516	0.0081039	1.46006	1.23205	>sp|Q9BV57|MTND_HUMAN 1,2-dihydroxy-3-keto-5-methylthiopentene dioxygenase OS=Homo sapiens GN=ADI1 PE=1 SV=1	Q9BV57	1,2-dihydroxy-3-keto-5-methylthiopentene dioxygenase	MTND_HUMAN	17.135	17.2392	16.9629
AHCY	+	+						+	+	adenosylhomocysteinase activity;catalytic activity;hydrolase activity;hydrolase activity, acting on ether bonds;trialkylsulfonium hydrolase activity	amine metabolic process;cellular amino acid metabolic process;cellular ketone metabolic process;cellular metabolic process;cellular nitrogen compound metabolic process;cellular process;cofactor metabolic process;heterocycle metabolic process;metabolic process;nitrogen compound metabolic process;nucleobase-containing compound metabolic process;nucleobase-containing small molecule metabolic process…	cell part;cytoplasm;cytoplasmic membrane-bounded vesicle;cytosol;extracellular organelle;intracellular membrane-bounded organelle;intracellular organelle;organelle;vesicle	3D-structure;Acetylation;Alternativesplicing;Completeproteome;Cytoplasm;Directproteinsequencing;Diseasemutation;Hydrolase;NAD;One-carbonmetabolism;Polymorphism;Referenceproteome	19	5.0544	0.0190503	-1.07987	-1.04066	3.74105	0.0288178	-1.34124	-1.21887	1.25103	0.736478	-0.261364	-0.23802	0.343694	0.909674	0.0972029	0.0866022	0.131692	0.956223	-0.0334791	-0.030616	4.97624	0.0844648	-1.21056	-1.09174	3.50147	0.023546	-1.11335	-1.01588	>sp|P23526|SAHH_HUMAN Adenosylhomocysteinase OS=Homo sapiens GN=AHCY PE=1 SV=4	P23526	Adenosylhomocysteinase	SAHH_HUMAN	20.2081	20.3139	20.2527
AHNAK	+	+	+					+	+		biological regulation;cellular component assembly;cellular component organization;macromolecular complex assembly;protein complex assembly	cell part;cytoplasm;cytoskeleton;cytosol;extracellular organelle;intracellular membrane-bounded organelle;intracellular non-membrane-bounded organelle;intracellular organelle;membrane;nucleus;organelle;plasma membrane;vesicle	3D-structure;Acetylation;Alternativesplicing;Completeproteome;Nucleus;Phosphoprotein;Polymorphism;Referenceproteome;Repeat	253	5.71553	0.0062	3.88877	3.55906	2.43194	0.0118081	2.36801	1.70423	1.79836	0.0899787	-1.52076	-1.10311	0.175259	0.834612	0.252915	0.161606	1.52879	0.384587	-0.507467	-0.440046	3.08518	0.0327407	3.12839	2.00623	4.34067	0	3.38131	2.86942	>sp|Q09666|AHNK_HUMAN Neuroblast differentiation-associated protein AHNAK OS=Homo sapiens GN=AHNAK PE=1 SV=2	Q09666	Neuroblast differentiation-associated protein AHNAK	AHNK_HUMAN	26.3134	26.1334	25.9956
AIF1L	+	+						+	+	actin binding;actin filament binding;binding;calcium ion binding;cation binding;cytoskeletal protein binding;ion binding;metal ion binding;protein binding		cell part;cytoplasm;cytoskeleton;extracellular organelle;intracellular non-membrane-bounded organelle;intracellular organelle;macromolecular complex;organelle;protein complex;vesicle	3D-structure;Acetylation;Actin-binding;Alternativesplicing;Calcium;Cellmembrane;Cellprojection;Completeproteome;Cytoplasm;Cytoskeleton;Membrane;Metal-binding;Phosphoprotein;Referenceproteome;Repeat	4	1.33429	0.0090961	-2.39026	-1.30034	0.932152	0.0754927	-1.69467	-0.916106	1.6052	0.388509	0.69559	0.58036	0.605851	0.707416	0.377939	0.290768	1.39143	0.274054	0.725733	0.583734	1.92841	0.0514423	-2.04247	-1.27284	0.90143	0.0394975	-1.66453	-0.89423	>sp|Q9BQI0|AIF1L_HUMAN Allograft inflammatory factor 1-like OS=Homo sapiens GN=AIF1L PE=1 SV=1	Q9BQI0	Allograft inflammatory factor 1-like	AIF1L_HUMAN	15.5929	12.8033	14.829
AK4	+	+						+		adenyl nucleotide binding;adenyl ribonucleotide binding;adenylate kinase activity;ATP binding;binding;catalytic activity;GTP binding;guanyl nucleotide binding;guanyl ribonucleotide binding;kinase activity;nucleobase-containing compound kinase activity;nucleoside diphosphate kinase activity;nucleoside triphosphate adenylate kinase activity;nucleotide binding;nucleotide kinase activity;phosphotrans…	anatomical structure development;biosynthetic process;cellular metabolic process;cellular nitrogen compound metabolic process;cellular process;developmental process;heterocycle metabolic process;metabolic process;nitrogen compound metabolic process;nucleobase-containing compound metabolic process;nucleobase-containing small molecule metabolic process;nucleotide metabolic process;phosphorus metabo…	cell part;extracellular organelle;intracellular membrane-bounded organelle;intracellular organelle;mitochondrion;organelle;vesicle	3D-structure;Acetylation;ATP-binding;Completeproteome;GTP-binding;Kinase;Mitochondrion;Nucleotide-binding;Referenceproteome;Transferase	10	2.49577	0.00258	-2.26199	-1.66629	2.4191	0.011455	-2.39824	-1.71591	0.163247	0.892162	-0.136249	-0.103695	0.883838	0.513772	1.15027	0.687977	0.472718	0.300963	1.08215	0.543187	4.0477	0.0271875	-2.33011	-1.80561	0.505136	0.140708	-1.17984	-0.583561	>sp|P27144|KAD4_HUMAN Adenylate kinase 4, mitochondrial OS=Homo sapiens GN=AK4 PE=1 SV=1	P27144	Adenylate kinase 4, mitochondrial	KAD4_HUMAN	15.0018	15.7803	14.7677
AKAP17A	+	+						+	+	binding;nucleotide binding;protein binding;protein kinase A binding	biological regulation;cell activation;cellular metabolic process;cellular nitrogen compound metabolic process;cellular process;immune system process;macromolecule metabolic process;metabolic process;mRNA metabolic process;mRNA processing;nitrogen compound metabolic process;nucleobase-containing compound metabolic process;primary metabolic process;response to stimulus;RNA metabolic process;RNA pro…	cell part;cytoplasm;intracellular membrane-bounded organelle;intracellular organelle;macromolecular complex;nucleoplasm;nucleus;organelle;ribonucleoprotein complex;spliceosomal complex	Alternativesplicing;Completeproteome;mRNAprocessing;mRNAsplicing;Nucleus;Phosphoprotein;Polymorphism;Referenceproteome;RNA-binding;Spliceosome	2	3.41662	0.00497624	1.8219	1.56376	2.09613	0.0252253	1.71809	1.27241	0.120494	0.92068	-0.103806	-0.0789858	0.320777	0.861017	0.167358	0.136822	0.377964	0.848421	0.115455	0.102333	3.89354	0.0369347	1.77	1.43514	3.18874	0.00405128	1.93735	1.61317	>sp|Q02040|AK17A_HUMAN A-kinase anchor protein 17A OS=Homo sapiens GN=AKAP17A PE=1 SV=2	Q02040	A-kinase anchor protein 17A	AK17A_HUMAN	18.5054	18.1885	17.9532
AKR1C3	+	+						+	+	15-hydroxyprostaglandin-D dehydrogenase (NADP+) activity;alcohol dehydrogenase (NADP+) activity;alditol:NADP+ 1-oxidoreductase activity;aldo-keto reductase (NADP) activity;androsterone dehydrogenase activity;catalytic activity;delta4-3-oxosteroid 5beta-reductase activity;dihydrotestosterone 17-beta-dehydrogenase activity;enone reductase activity;geranylgeranyl reductase activity;indanol dehydroge…	alcohol metabolic process;anatomical structure development;biological regulation;biosynthetic process;catabolic process;cell communication;cell differentiation;cellular aldehyde metabolic process;cellular ketone metabolic process;cellular lipid metabolic process;cellular metabolic process;cellular process;detection of stimulus;developmental process;establishment of localization;hormone metabolic …	cell part;cytoplasm;cytosol;extracellular organelle;intracellular;intracellular membrane-bounded organelle;intracellular organelle;nucleus;organelle;vesicle	3D-structure;Alternativesplicing;Completeproteome;Cytoplasm;NAD;NADP;Oxidoreductase;Polymorphism;Referenceproteome	4	2.18062	0.0369899	1.02561	0.856161	2.53957	0.028188	1.50704	1.22346	1.06234	0.562862	0.481432	0.396903	0.0296649	0.982874	-0.0232075	-0.0182698	0.308797	0.731664	0.217508	0.168966	3.0086	0.0989061	1.26633	1.02673	1.83637	0.0297095	1.24312	0.955143	>sp|P42330|AK1C3_HUMAN Aldo-keto reductase family 1 member C3 OS=Homo sapiens GN=AKR1C3 PE=1 SV=4	P42330	Aldo-keto reductase family 1 member C3	AK1C3_HUMAN	17.3998	16.8864	17.0157
ALAD	+	+						+	+	binding;carbon-oxygen lyase activity;catalytic activity;cation binding;hydro-lyase activity;identical protein binding;ion binding;lead ion binding;lyase activity;metal ion binding;porphobilinogen synthase activity;protein binding;transition metal ion binding;zinc ion binding	biosynthetic process;cellular aromatic compound metabolic process;cellular component assembly;cellular component organization;cellular metabolic process;cellular nitrogen compound metabolic process;cellular process;cofactor metabolic process;heterocycle metabolic process;macromolecular complex assembly;metabolic process;nitrogen compound metabolic process;pigment metabolic process;protein complex…	cell part;cytosol;extracellular organelle;intracellular membrane-bounded organelle;intracellular organelle;nucleus;organelle;vesicle	3D-structure;Allostericenzyme;Alternativesplicing;Completeproteome;Directproteinsequencing;Diseasemutation;Hemebiosynthesis;Lyase;Metal-binding;Phosphoprotein;Polymorphism;Porphyrinbiosynthesis;Referenceproteome;Zinc	3	2.24844	0.002325	3.82357	2.24074	1.0865	0.0200736	3.47621	1.38816	0.0736942	0.860472	-0.347353	-0.130877	0.486008	0.549792	-1.15184	-0.550576	0.869872	0.169941	-1.32551	-0.775568	1.90858	0.0285479	3.64989	1.74527	3.88576	0.00203509	2.49805	2.13181	>sp|P13716|HEM2_HUMAN Delta-aminolevulinic acid dehydratase OS=Homo sapiens GN=ALAD PE=1 SV=1	P13716	Delta-aminolevulinic acid dehydratase	HEM2_HUMAN	14.9544	14.8527	15.2319
ALDH1A1	+	+						+	+	3-chloroallyl aldehyde dehydrogenase activity;aldehyde dehydrogenase (NAD) activity;androgen binding;benzaldehyde dehydrogenase (NAD+) activity;binding;catalytic activity;enzyme activator activity;enzyme regulator activity;GTPase activator activity;GTPase regulator activity;hormone binding;lipid binding;nucleoside-triphosphatase regulator activity;oxidoreductase activity;oxidoreductase activity, …	alcohol metabolic process;biological regulation;cellular aldehyde metabolic process;cellular lipid metabolic process;cellular metabolic process;cellular process;hormone metabolic process;lipid metabolic process;metabolic process;primary metabolic process;small molecule metabolic process;vitamin metabolic process;xenobiotic metabolic process	cell part;cytoplasm;cytosol;extracellular organelle;organelle;vesicle	3D-structure;Acetylation;Completeproteome;Cytoplasm;Directproteinsequencing;NAD;Oxidoreductase;Phosphoprotein;Polymorphism;Referenceproteome	23	3.76905	0.00288372	3.33363	2.6766	3.32541	0.00808547	2.49485	2.01426	1.17686	0.352518	-0.838774	-0.628249	0.437583	0.730135	0.35955	0.2622	0.0692228	0.933049	-0.0598373	-0.0459534	4.12834	0.0388475	2.91424	2.15404	4.18105	0	3.27379	2.75219	>sp|P00352|AL1A1_HUMAN Retinal dehydrogenase 1 OS=Homo sapiens GN=ALDH1A1 PE=1 SV=2	P00352	Retinal dehydrogenase 1	AL1A1_HUMAN	21.4982	21.533	21.3703
ALDH1L2	+	+						+	+	aldehyde dehydrogenase (NAD) activity;catalytic activity;formyltetrahydrofolate dehydrogenase activity;hydroxymethyl-, formyl- and related transferase activity;methyltransferase activity;oxidoreductase activity;oxidoreductase activity, acting on the aldehyde or oxo group of donors;oxidoreductase activity, acting on the aldehyde or oxo group of donors, NAD or NADP as acceptor;oxidoreductase activi…	biosynthetic process;catabolic process;cellular aromatic compound metabolic process;cellular metabolic process;cellular nitrogen compound metabolic process;cellular process;cofactor metabolic process;heterocycle metabolic process;metabolic process;nitrogen compound metabolic process;one-carbon metabolic process;small molecule metabolic process	cell part;extracellular organelle;intracellular membrane-bounded organelle;intracellular organelle;mitochondrion;organelle;vesicle	Acetylation;Alternativesplicing;Completeproteome;Mitochondrion;NADP;One-carbonmetabolism;Oxidoreductase;Phosphopantetheine;Phosphoprotein;Referenceproteome;Transitpeptide	15	4.43396	0.00238436	2.02077	1.83541	3.25854	0.0122157	2.02314	1.68409	0.00354841	0.99962	0.00236607	0.00194247	0.25758	0.86121	-0.175301	-0.136839	0.172868	0.809171	-0.174118	-0.126053	5.63428	0.0284928	2.02195	1.7657	2.11451	0.00722344	1.84665	1.34597	>sp|Q3SY69|AL1L2_HUMAN Mitochondrial 10-formyltetrahydrofolate dehydrogenase OS=Homo sapiens GN=ALDH1L2 PE=1 SV=2	Q3SY69	Mitochondrial 10-formyltetrahydrofolate dehydrogenase	AL1L2_HUMAN	18.2516	18.32	18.182
ALPL	+	+						+	+	alkaline phosphatase activity;binding;catalytic activity;cation binding;hydrolase activity;hydrolase activity, acting on acid anhydrides;hydrolase activity, acting on acid anhydrides, in phosphorus-containing anhydrides;hydrolase activity, acting on ester bonds;ion binding;metal ion binding;phosphatase activity;phosphoric ester hydrolase activity;pyrophosphatase activity	anatomical structure development;cell differentiation;cellular process;developmental process;multicellular organismal process;response to biotic stimulus;response to chemical stimulus;response to endogenous stimulus;response to external stimulus;response to extracellular stimulus;response to stimulus	cell part;extracellular matrix;extracellular organelle;extracellular space;membrane;organelle;plasma membrane;vesicle	Alternativesplicing;Biomineralization;Cellmembrane;Completeproteome;Directproteinsequencing;Diseasemutation;Disulfidebond;Glycoprotein;GPI-anchor;Hydrolase;Lipoprotein;Magnesium;Membrane;Metal-binding;Phosphoprotein;Polymorphism;Referenceproteome;Signal;Transmembrane;Zinc	15	2.64755	0.00476033	-1.98282	-1.54271	2.85644	0.0103127	-2.32637	-1.79692	0.484087	0.708174	-0.343546	-0.262524	0.117378	0.935533	0.0728254	0.0590906	0.174421	0.881059	-0.0989475	-0.0814396	4.10767	0.0296306	-2.15459	-1.70611	3.36588	0.00335593	-2.08177	-1.74298	>sp|P05186|PPBT_HUMAN Alkaline phosphatase, tissue-nonspecific isozyme OS=Homo sapiens GN=ALPL PE=1 SV=4	P05186	Alkaline phosphatase, tissue-nonspecific isozyme	PPBT_HUMAN	16.9198	17.1566	16.5032
ANP32A	+	+						+	+		biological regulation;biosynthetic process;cellular metabolic process;cellular nitrogen compound metabolic process;cellular process;establishment of localization;macromolecule metabolic process;metabolic process;nitrogen compound metabolic process;nuclear transport;nucleobase-containing compound metabolic process;nucleocytoplasmic transport;primary metabolic process;response to stimulus;RNA metab…	cell part;cytoplasm;endoplasmic reticulum;intracellular membrane-bounded organelle;intracellular organelle;nucleoplasm;nucleus;organelle	3D-structure;Acetylation;Completeproteome;Cytoplasm;Directproteinsequencing;Endoplasmicreticulum;Leucine-richrepeat;Nucleus;Phosphoprotein;Referenceproteome;Repeat;Repressor;Transcription;Transcriptionregulation	8	3.35814	0.0048755	-1.78531	-1.52923	3.45731	0.0159014	-1.7036	-1.48051	0.187153	0.930576	0.0817057	0.0700253	2.01203	0.655438	-0.423936	-0.378367	1.24332	0.500197	-0.383083	-0.334666	5.46819	0.0328734	-1.74446	-1.54038	4.17796	0.00421818	-2.16839	-1.92616	>sp|P39687|AN32A_HUMAN Acidic leucine-rich nuclear phosphoprotein 32 family member A OS=Homo sapiens GN=ANP32A PE=1 SV=1	P39687	Acidic leucine-rich nuclear phosphoprotein 32 family member A	AN32A_HUMAN	18.2935	18.2766	17.9642
ANP32E	+	+						+	+	binding;enzyme inhibitor activity;enzyme regulator activity;histone binding;phosphatase inhibitor activity;phosphatase regulator activity;protein binding	cellular component organization;cellular process;chromatin modification;chromatin organization;chromosome organization;organelle organization	cell part;chromatin remodeling complex;cytoplasmic membrane-bounded vesicle;intracellular membrane-bounded organelle;intracellular organelle;macromolecular complex;nucleus;organelle;protein complex;vesicle	3D-structure;Acetylation;Alternativesplicing;Chaperone;Chromatinregulator;Completeproteome;Cytoplasm;Leucine-richrepeat;Nucleus;Phosphoprotein;Referenceproteome;Repeat	8	3.25461	0.0173276	-1.18616	-1.06068	2.88348	0.0565466	-1.14563	-1.00253	0.0890498	0.971305	0.0405318	0.0348851	2.03468	0.671851	-0.387602	-0.349534	1.60631	0.503163	-0.367336	-0.332501	4.71655	0.0968512	-1.1659	-1.04593	4.56948	0.00638581	-1.5535	-1.44947	>sp|Q9BTT0|AN32E_HUMAN Acidic leucine-rich nuclear phosphoprotein 32 family member E OS=Homo sapiens GN=ANP32E PE=1 SV=1	Q9BTT0	Acidic leucine-rich nuclear phosphoprotein 32 family member E	AN32E_HUMAN	18.6409	18.5625	18.4224
ANXA1	+	+						+	+	ATPase activity;ATPase activity, coupled;binding;binding, bridging;calcium ion binding;calcium-dependent phospholipid binding;calcium-dependent protein binding;catalytic activity;cation binding;DNA binding;DNA-dependent ATPase activity;double-stranded DNA-dependent ATPase activity;enzyme inhibitor activity;enzyme regulator activity;helicase activity;hydrolase activity;hydrolase activity, acting o…	anatomical structure development;biological regulation;cell activation;cell differentiation;cellular component movement;cellular metabolic process;cellular nitrogen compound metabolic process;cellular process;developmental process;DNA geometric change;DNA metabolic process;establishment of localization;homeostatic process;hormone transport;immune system process;lipid transport;macromolecule metab…	cell part;cell projection;cell surface;cilium;cytoplasm;cytoskeleton;endosome;extracellular organelle;extracellular region;extracellular space;intracellular membrane-bounded organelle;intracellular non-membrane-bounded organelle;intracellular organelle;lysosome;macromolecular complex;membrane;nucleus;organelle;plasma membrane;protein complex;vacuole;vesicle	3D-structure;Acetylation;Annexin;Calcium;Calcium/phospholipid-binding;Cellmembrane;Cellprojection;Cilium;Completeproteome;Cytoplasm;Directproteinsequencing;Isopeptidebond;Membrane;Nucleus;PhospholipaseA2inhibitor;Phosphoprotein;Referenceproteome;Repeat	24	5.34808	0.031	4.83695	4.23387	4.75921	0.0114839	3.96524	3.40621	1.87182	0.273712	-0.871707	-0.72259	0.479672	0.741115	-0.33048	-0.250994	2.27303	0.217798	-0.766333	-0.672595	5.62144	0.044	4.4011	3.34107	6.50773	0	4.07062	3.83505	>sp|P04083|ANXA1_HUMAN Annexin A1 OS=Homo sapiens GN=ANXA1 PE=1 SV=2	P04083	Annexin A1	ANXA1_HUMAN	23.514	23.4638	23.3511
ANXA11	+	+	+					+	+	antigen binding;binding;calcium ion binding;calcium-dependent phospholipid binding;calcium-dependent protein binding;cation binding;ion binding;lipid binding;metal ion binding;MHC class II protein complex binding;MHC protein complex binding;phosphatidylethanolamine binding;phospholipid binding;protein binding	cell cycle;cell division;cellular component organization;cellular membrane organization;cellular process;endocytosis;establishment of localization;membrane invagination;membrane organization;response to chemical stimulus;response to stimulus;transport;vesicle-mediated transport	cell part;cytoplasm;cytoplasmic membrane-bounded vesicle;extracellular organelle;intracellular membrane-bounded organelle;intracellular non-membrane-bounded organelle;intracellular organelle;lysosome;membrane;midbody;nuclear envelope;nucleoplasm;organelle;vacuole;vesicle	Acetylation;Alternativesplicing;Annexin;Calcium;Calcium/phospholipid-binding;Cellcycle;Celldivision;Completeproteome;Cytoplasm;Cytoskeleton;Nucleus;Polymorphism;Referenceproteome;Repeat	22	4.69241	0.00313924	3.11264	2.74504	1.72783	0.0371294	1.58759	1.12184	1.63911	0.0991741	-1.52504	-1.07038	0.358945	0.700316	0.476033	0.301606	0.7399	0.617002	-0.286488	-0.243282	2.33955	0.0343937	2.35012	1.49379	4.29381	0.0018	2.82615	2.45066	>sp|P50995|ANX11_HUMAN Annexin A11 OS=Homo sapiens GN=ANXA11 PE=1 SV=1	P50995	Annexin A11	ANX11_HUMAN	21.1478	21.0481	20.9057
ANXA2	+		+					+	+	binding;calcium ion binding;calcium-dependent phospholipid binding;calcium-dependent protein binding;cation binding;enzyme inhibitor activity;enzyme regulator activity;ion binding;lipase inhibitor activity;lipid binding;metal ion binding;phosphatidylinositol binding;phosphatidylinositol-4,5-bisphosphate binding;phospholipase A2 inhibitor activity;phospholipase inhibitor activity;phospholipid bind…	anatomical structure formation involved in morphogenesis;biological regulation;cellular component assembly;cellular component organization;cellular membrane organization;cellular process;developmental process;establishment of localization;extracellular matrix organization;extracellular structure organization;macromolecular complex assembly;membrane organization;multicellular organismal process;or…	cell cortex;cell part;cell projection;cell surface;cytoplasmic membrane-bounded vesicle;endosome;extracellular organelle;extracellular space;intracellular membrane-bounded organelle;intracellular organelle;lipid particle;membrane;midbody;nucleus;organelle;plasma membrane;vesicle	3D-structure;Acetylation;Alternativesplicing;Annexin;Basementmembrane;Calcium;Calcium/phospholipid-binding;Completeproteome;Directproteinsequencing;Extracellularmatrix;Phosphoprotein;Polymorphism;Referenceproteome;Repeat;Secreted;Ublconjugation	12	4.36282	0.0107826	4.19881	3.44534	0.678246	0.111246	1.72129	0.799463	0.991774	0.0842145	-2.47753	-1.14098	0.382882	0.606884	0.97882	0.460068	0.330175	0.687836	-0.259944	-0.196308	1.48282	0.0384375	2.96005	1.39848	4.02396	0	3.93887	3.15139	>sp|P07355|ANXA2_HUMAN Annexin A2 OS=Homo sapiens GN=ANXA2 PE=1 SV=2	P07355	Annexin A2	ANXA2_HUMAN	24.3679	24.5418	24.4806
ANXA3	+	+						+		binding;calcium ion binding;calcium-dependent phospholipid binding;calcium-dependent protein binding;cation binding;enzyme inhibitor activity;enzyme regulator activity;ion binding;lipase inhibitor activity;lipid binding;metal ion binding;phospholipase A2 inhibitor activity;phospholipase inhibitor activity;phospholipid binding;protein binding	biological regulation;cell activation;cellular component organization;cellular membrane organization;cellular process;endocytosis;establishment of localization;exocytosis;immune system process;membrane invagination;membrane organization;multi-organism process;response to biotic stimulus;response to stimulus;response to stress;secretion;transport;vesicle-mediated transport	cell part;cytoplasm;cytoplasmic membrane-bounded vesicle;extracellular organelle;intracellular membrane-bounded organelle;intracellular organelle;membrane;organelle;plasma membrane;vesicle	3D-structure;Acetylation;Annexin;Calcium;Calcium/phospholipid-binding;Completeproteome;Directproteinsequencing;PhospholipaseA2inhibitor;Polymorphism;Referenceproteome;Repeat	14	2.98454	0.0199379	-1.16623	-1.02596	3.93438	0.00826201	-2.34663	-2.02844	3.37379	0.100655	-1.1804	-1.06372	1.74366	0.409369	1.25277	0.889783	1.70511	0.28701	0.662563	0.563374	2.48779	0.0536876	-1.75643	-1.25331	1.13477	0.303865	-0.503663	-0.416686	>sp|P12429|ANXA3_HUMAN Annexin A3 OS=Homo sapiens GN=ANXA3 PE=1 SV=3	P12429	Annexin A3	ANXA3_HUMAN	16.071	16.3965	15.9863
ANXA4	+	+						+	+	binding;calcium ion binding;calcium-dependent phospholipid binding;calcium-dependent protein binding;cation binding;enzyme inhibitor activity;enzyme regulator activity;identical protein binding;ion binding;lipase inhibitor activity;lipid binding;metal ion binding;NF-kappaB binding;phospholipase inhibitor activity;phospholipid binding;protein binding;transcription factor binding	biological regulation;cell differentiation;cellular process;developmental process;regulation of transport;response to stimulus;signal transduction	cell part;cell surface;cytoplasm;extracellular organelle;intracellular membrane-bounded organelle;intracellular organelle;membrane;nucleus;organelle;plasma membrane;vesicle	3D-structure;Acetylation;Alternativesplicing;Annexin;Calcium;Calcium/phospholipid-binding;Completeproteome;Directproteinsequencing;Phosphoprotein;Polymorphism;Referenceproteome;Repeat	18	2.85154	0.00314163	2.6663	1.9917	2.00955	0.0230345	1.81869	1.30604	0.770219	0.400522	-0.847609	-0.562528	0.0616948	0.940225	0.0777639	0.0536457	0.383738	0.606001	-0.346041	-0.250868	2.87807	0.0333395	2.24249	1.56223	3.47678	0.0042439	2.32026	1.9289	>sp|P09525|ANXA4_HUMAN Annexin A4 OS=Homo sapiens GN=ANXA4 PE=1 SV=4	P09525	Annexin A4	ANXA4_HUMAN	20.1828	20.101	19.921
ANXA5	+	+						+	+	binding;calcium ion binding;calcium-dependent phospholipid binding;cation binding;enzyme inhibitor activity;enzyme regulator activity;ion binding;lipase inhibitor activity;lipid binding;metal ion binding;phospholipase inhibitor activity;phospholipid binding	biological regulation;cellular process;coagulation;multicellular organismal process;regulation of body fluid levels;response to chemical stimulus;response to stimulus;signal transduction	cell part;cytoplasm;extracellular organelle;intracellular;membrane;organelle;vesicle	3D-structure;Acetylation;Annexin;Bloodcoagulation;Calcium;Calcium/phospholipid-binding;Completeproteome;Directproteinsequencing;Hemostasis;Referenceproteome;Repeat;S-nitrosylation	28	3.37373	0.00285937	2.37723	1.94707	3.66864	0.0109891	2.02327	1.74718	0.669328	0.685051	-0.353955	-0.285471	0.739189	0.723294	0.328954	0.269148	0.230079	0.817172	0.151976	0.120721	4.88886	0.0286387	2.20025	1.82764	3.77482	0.0020531	2.5292	2.13325	>sp|P08758|ANXA5_HUMAN Annexin A5 OS=Homo sapiens GN=ANXA5 PE=1 SV=2	P08758	Annexin A5	ANXA5_HUMAN	24.2595	24.0844	23.9483
ANXA6	+	+						+	+	binding;calcium ion binding;calcium-dependent phospholipid binding;calcium-dependent protein binding;cation binding;channel activity;cholesterol binding;gated channel activity;GTP binding;guanyl nucleotide binding;guanyl ribonucleotide binding;identical protein binding;ion binding;ion channel activity;ion transmembrane transporter activity;ligand-gated channel activity;ligand-gated ion channel ac…	biological regulation;cellular component assembly;cellular component organization;cellular process;establishment of localization;ion transport;macromolecular complex assembly;protein complex assembly;transmembrane transport;transport	cell part;cytoplasmic membrane-bounded vesicle;extracellular organelle;intracellular membrane-bounded organelle;intracellular organelle;membrane;organelle;vesicle	3D-structure;Acetylation;Alternativesplicing;Annexin;Calcium;Calcium/phospholipid-binding;Completeproteome;Cytoplasm;Directproteinsequencing;Phosphoprotein;Referenceproteome;Repeat	45	3.37348	0.00182353	3.04598	2.37389	4.82454	0.00575723	2.48727	2.26295	0.943928	0.521994	-0.558713	-0.437557	1.62791	0.51673	-0.839973	-0.650452	1.51327	0.141016	-1.11933	-0.834152	4.81537	0.0397193	2.76663	2.19056	3.00052	0.00448725	1.92665	1.57446	>sp|P08133|ANXA6_HUMAN Annexin A6 OS=Homo sapiens GN=ANXA6 PE=1 SV=3	P08133	Annexin A6	ANXA6_HUMAN	23.6897	23.545	23.4071
ANXA7	+							+	+	binding;calcium ion binding;calcium-dependent phospholipid binding;calcium-dependent protein binding;cation binding;integrin binding;ion binding;lipid binding;metal ion binding;phospholipid binding;protein binding;protein complex binding;receptor binding	autophagy;behavior;behavioral interaction between organisms;biological regulation;catabolic process;cell differentiation;cell proliferation;cellular component organization;cellular homeostasis;cellular ion homeostasis;cellular metabolic process;cellular process;developmental process;homeostatic process;membrane fusion;membrane organization;metabolic process;multicellular organismal process;multi-…	cell part;cytosol;extracellular organelle;intracellular membrane-bounded organelle;intracellular organelle;membrane;nuclear envelope;nucleus;organelle;plasma membrane;vesicle	Acetylation;Alternativesplicing;Annexin;Calcium;Calcium/phospholipid-binding;Completeproteome;Directproteinsequencing;Polymorphism;Referenceproteome;Repeat	19	3.55362	0.0047703	1.85411	1.60536	1.73102	0.11205	1.00749	0.797775	1.35799	0.327833	-0.846619	-0.655614	0.0904714	0.932172	0.0871334	0.0644156	0.716119	0.569993	-0.336176	-0.276784	2.40507	0.090209	1.4308	1.06854	3.0219	0.00791405	1.51793	1.29297	>sp|P20073|ANXA7_HUMAN Annexin A7 OS=Homo sapiens GN=ANXA7 PE=1 SV=3	P20073	Annexin A7	ANXA7_HUMAN	20.2091	20.0724	19.9889
AP1S1	+	+	+					+		protein transporter activity;substrate-specific transporter activity;transporter activity	biological regulation;cellular component organization;cellular membrane organization;cellular process;endocytosis;establishment of localization;Golgi vesicle transport;immune system process;membrane invagination;membrane organization;multi-organism process;protein transport;response to biotic stimulus;response to stimulus;transport;vesicle-mediated transport;viral reproduction	AP-type membrane coat adaptor complex;cell part;cytosol;extracellular organelle;macromolecular complex;membrane;organelle;protein complex;vesicle	3D-structure;Alternativesplicing;Coatedpit;Completeproteome;Cytoplasmicvesicle;Deafness;Golgiapparatus;Ichthyosis;Membrane;Mentalretardation;Neuropathy;Phosphoprotein;Proteintransport;Referenceproteome;Transport	2	3.43741	0.00276647	2.10036	1.76801	1.16564	0.0108132	5.98194	1.75263	0.735379	0.0848961	3.88158	1.13513	0.825589	0.329446	-3.31207	-1.08756	1.51733	0.100141	-1.37128	-0.967349	1.06099	0.0435217	4.04115	1.33337	0.897449	0.179938	0.72908	0.528752	>sp|P61966|AP1S1_HUMAN AP-1 complex subunit sigma-1A OS=Homo sapiens GN=AP1S1 PE=1 SV=1	P61966	AP-1 complex subunit sigma-1A	AP1S1_HUMAN	15.9316	15.8156	15.7723
AP2M1	+	+						+	+	binding;lipid binding;lipoprotein particle receptor binding;low-density lipoprotein particle receptor binding;peptide binding;protein binding;receptor binding;signal sequence binding;transporter activity	biological regulation;cell communication;cell-cell signaling;cellular component organization;cellular membrane organization;cellular process;endocytosis;establishment of localization;immune system process;locomotion;membrane invagination;membrane organization;protein transport;response to chemical stimulus;response to external stimulus;response to stimulus;signal transduction;signaling;transport;…	AP-type membrane coat adaptor complex;cell part;cytosol;extracellular organelle;intracellular membrane-bounded organelle;intracellular organelle;macromolecular complex;membrane;mitochondrion;organelle;plasma membrane;protein complex;vesicle	3D-structure;Alternativesplicing;Cellmembrane;Coatedpit;Completeproteome;Endocytosis;Lipid-binding;Membrane;Phosphoprotein;Proteintransport;Referenceproteome;Transport	16	3.16114	0.0105318	1.36573	1.1938	2.41456	0.0750322	1.08546	0.919497	0.591693	0.743598	-0.280267	-0.23131	0.567792	0.767121	0.269577	0.220001	0.186099	0.848385	0.129443	0.10228	3.72926	0.0969955	1.22559	1.0461	2.46107	0.00912552	1.49517	1.20434	>sp|Q96CW1|AP2M1_HUMAN AP-2 complex subunit mu OS=Homo sapiens GN=AP2M1 PE=1 SV=2	Q96CW1	AP-2 complex subunit mu	AP2M1_HUMAN	19.6814	19.5402	19.7638
APOBEC3C	+	+						+	+	binding;catalytic activity;cation binding;hydrolase activity;hydrolase activity, acting on carbon-nitrogen (but not peptide) bonds;hydrolase activity, acting on carbon-nitrogen (but not peptide) bonds, in cyclic amidines;ion binding;metal ion binding;transition metal ion binding;zinc ion binding	biological regulation;catabolic process;cellular metabolic process;cellular nitrogen compound metabolic process;cellular process;DNA metabolic process;DNA modification;heterocycle metabolic process;immune system process;macromolecule metabolic process;macromolecule modification;metabolic process;multi-organism process;nitrogen compound metabolic process;nucleobase-containing compound catabolic pr…	cell part;cytoplasm;intracellular membrane-bounded organelle;intracellular organelle;nucleus;organelle	3D-structure;Antiviraldefense;Completeproteome;Cytoplasm;Host-virusinteraction;Hydrolase;Immunity;Innateimmunity;Metal-binding;Nucleus;Referenceproteome;Zinc	2	2.37851	0.00684615	1.93727	1.45711	2.0296	0.0167834	2.13124	1.46587	0.128353	0.867688	0.193975	0.124781	0.823739	0.613216	-0.6259	-0.451184	0.642784	0.435584	-0.528912	-0.385646	3.03761	0.0354264	2.03425	1.48421	2.74252	0.010178	1.40835	1.18232	>sp|Q9NRW3|ABC3C_HUMAN DNA dC->dU-editing enzyme APOBEC-3C OS=Homo sapiens GN=APOBEC3C PE=1 SV=2	Q9NRW3	DNA dC->dU-editing enzyme APOBEC-3C	ABC3C_HUMAN	15.5297	15.6227	15.7361
APOE	+	+						+	+	antioxidant activity;beta-amyloid binding;binding;carbohydrate binding;cation binding;cholesterol binding;cholesterol transporter activity;cytoskeletal protein binding;enzyme activator activity;enzyme regulator activity;glycosaminoglycan binding;heparin binding;hydroxyapatite binding;identical protein binding;ion binding;lipid binding;lipid transporter activity;lipoprotein particle binding;lipopr…	aging;alcohol metabolic process;anatomical structure morphogenesis;biological regulation;biosynthetic process;catabolic process;cell communication;cell differentiation;cell-cell signaling;cellular component assembly;cellular component morphogenesis;cellular component organization;cellular homeostasis;cellular ion homeostasis;cellular lipid metabolic process;cellular localization;cellular membrane…	cell body;cell part;cell projection;cytoplasm;endoplasmic reticulum;endosome;extracellular matrix;extracellular organelle;extracellular region;extracellular space;Golgi apparatus;intracellular membrane-bounded organelle;intracellular organelle;lysosome;macromolecular complex;membrane;neuron projection;neuronal cell body;nuclear envelope;nucleus;organelle;plasma membrane;protein complex;vacuole;ve…	3D-structure;Alzheimerdisease;Amyloidosis;Cholesterolmetabolism;Chylomicron;Completeproteome;Directproteinsequencing;Diseasemutation;Glycation;Glycoprotein;HDL;Heparin-binding;Hyperlipidemia;Lipidmetabolism;Lipidtransport;Neurodegeneration;Oxidation;Phosphoprotein;Polymorphism;Referenceproteome;Repeat;Secreted;Signal;Steroidmetabolism;Sterolmetabolism;Transport;VLDL	20	3.10172	0.00996804	-1.41834	-1.22803	2.31607	0.0383547	-1.37969	-1.10895	0.0474984	0.975085	0.0386511	0.0302271	0.0237373	0.98947	0.0136201	0.0113786	0.0624919	0.960752	0.0329456	0.027846	3.8652	0.0655131	-1.39901	-1.17927	3.43204	0.00811561	-1.38539	-1.23213	>sp|P02649|APOE_HUMAN Apolipoprotein E OS=Homo sapiens GN=APOE PE=1 SV=1	P02649	Apolipoprotein E	APOE_HUMAN	18.1127	18.0053	18.1937
APPL2	+	+						+	+		biological regulation;cell cycle;cell proliferation;cellular process;response to stimulus;signal transduction	cell part;cytoplasm;extracellular organelle;intracellular membrane-bounded organelle;intracellular organelle;membrane;nucleus;organelle;vesicle	3D-structure;Alternativesplicing;Cellcycle;Chromosomalrearrangement;Completeproteome;Endosome;Membrane;Nucleus;Polymorphism;Referenceproteome	16	2.07695	0.00810226	1.89049	1.35979	2.11964	0.0730824	1.14162	0.928754	0.771484	0.442526	-0.748868	-0.517501	0.0122364	0.98959	-0.0166998	-0.0114169	0.28343	0.605758	-0.391134	-0.251342	2.26082	0.08396	1.51605	1.09608	1.69081	0.0177376	1.49935	1.06908	>sp|Q8NEU8|DP13B_HUMAN DCC-interacting protein 13-beta OS=Homo sapiens GN=APPL2 PE=1 SV=3	Q8NEU8	DCC-interacting protein 13-beta	DP13B_HUMAN	18.9289	18.7723	18.7878
ARF4	+	+						+	+	binding;catalytic activity;epidermal growth factor receptor binding;growth factor receptor binding;GTP binding;GTPase activity;guanyl nucleotide binding;guanyl ribonucleotide binding;hydrolase activity;hydrolase activity, acting on acid anhydrides;hydrolase activity, acting on acid anhydrides, in phosphorus-containing anhydrides;nucleoside-triphosphatase activity;nucleotide binding;protein bindin…	anatomical structure development;biological regulation;cell motility;cellular component movement;cellular component organization;cellular metabolic process;cellular process;developmental process;establishment of localization;locomotion;macromolecule metabolic process;macromolecule modification;metabolic process;organelle organization;primary metabolic process;protein metabolic process;protein mod…	cell part;cytosol;extracellular organelle;Golgi apparatus;intracellular membrane-bounded organelle;intracellular organelle;membrane;organelle;vesicle	3D-structure;Completeproteome;ER-Golgitransport;Golgiapparatus;GTP-binding;Lipoprotein;Myristate;Nucleotide-binding;Polymorphism;Proteintransport;Referenceproteome;Transport	8	3.94074	0.00511197	1.67735	1.50881	4.92993	0.0172517	1.52375	1.4414	0.541281	0.852726	-0.153598	-0.136493	1.35893	0.691811	0.365861	0.318416	0.630345	0.621483	0.289062	0.239578	6.15769	0.0364103	1.60055	1.46001	3.45823	0.00375451	1.96641	1.6752	>sp|P18085|ARF4_HUMAN ADP-ribosylation factor 4 OS=Homo sapiens GN=ARF4 PE=1 SV=3	P18085	ADP-ribosylation factor 4	ARF4_HUMAN	20.6789	20.6724	20.6876
ARF6	+	+						+	+	binding;catalytic activity;enzyme binding;GTP binding;GTPase activity;guanyl nucleotide binding;guanyl ribonucleotide binding;hydrolase activity;hydrolase activity, acting on acid anhydrides;hydrolase activity, acting on acid anhydrides, in phosphorus-containing anhydrides;nucleoside-triphosphatase activity;nucleotide binding;protein binding;purine nucleotide binding;purine ribonucleoside triphos…	anatomical structure development;biological adhesion;biological regulation;cell adhesion;cell cycle;cell death;cell division;cellular component movement;cellular component organization;cellular localization;cellular process;cytoskeleton organization;death;developmental process;establishment of localization;establishment or maintenance of cell polarity;localization;metabolic process;organelle orga…	cell cortex;cell part;cell projection;cytoplasmic membrane-bounded vesicle;endosome;extracellular organelle;Golgi apparatus;intracellular membrane-bounded organelle;intracellular organelle;membrane;midbody;organelle;plasma membrane;vesicle	3D-structure;Cellcycle;Celldivision;Cellmembrane;Cellprojection;Completeproteome;Cytoplasm;Differentiation;Endosome;ER-Golgitransport;Golgiapparatus;GTP-binding;Lipoprotein;Membrane;Myristate;Neurogenesis;Nucleotide-binding;Proteintransport;Referenceproteome;Transport	7	3.46937	0.00804255	1.55862	1.37095	1.41838	0.0860065	1.23456	0.878534	0.329949	0.743743	-0.324063	-0.230755	0.00326988	0.996667	-0.00295417	-0.00226678	0.376388	0.785056	-0.164986	-0.139358	2.69449	0.087942	1.39659	1.08062	2.77167	0.0106807	1.39363	1.17523	>sp|P62330|ARF6_HUMAN ADP-ribosylation factor 6 OS=Homo sapiens GN=ARF6 PE=1 SV=2	P62330	ADP-ribosylation factor 6	ARF6_HUMAN	18.0953	18.0424	17.7765
ARFGAP3	+	+						+	+	binding;cation binding;enzyme activator activity;enzyme regulator activity;GTPase activator activity;GTPase regulator activity;ion binding;metal ion binding;nucleoside-triphosphatase regulator activity;protein transporter activity;substrate-specific transporter activity;transition metal ion binding;transporter activity;zinc ion binding	biological regulation;cellular process;establishment of localization;protein transport;secretion;transport;vesicle-mediated transport	cell part;cytoplasm;cytosol;Golgi apparatus;intracellular membrane-bounded organelle;intracellular organelle;membrane;organelle	3D-structure;Alternativesplicing;Coiledcoil;Completeproteome;Cytoplasm;ER-Golgitransport;Golgiapparatus;GTPaseactivation;Membrane;Metal-binding;Phosphoprotein;Polymorphism;Proteintransport;Referenceproteome;Transport;Zinc;Zinc-finger	3	2.98483	0.00236893	2.33202	1.83144	0.985934	0.0414328	2.24768	1.08649	0.0259093	0.964381	-0.084336	-0.0403364	0.547768	0.591979	-0.831658	-0.484743	1.57929	0.20687	-0.873826	-0.696731	1.81366	0.0436206	2.28985	1.33233	3.44161	0.007875	1.45819	1.29022	>sp|Q9NP61|ARFG3_HUMAN ADP-ribosylation factor GTPase-activating protein 3 OS=Homo sapiens GN=ARFGAP3 PE=1 SV=1	Q9NP61	ADP-ribosylation factor GTPase-activating protein 3	ARFG3_HUMAN	14.2784	14.5895	14.6555
ARFGEF2	+	+				+		+	+	ARF guanyl-nucleotide exchange factor activity;binding;enzyme regulator activity;GABA receptor binding;GTPase regulator activity;guanyl-nucleotide exchange factor activity;nucleoside-triphosphatase regulator activity;protein binding;protein kinase A binding;protein kinase A regulatory subunit binding;receptor binding;small GTPase regulator activity	biological regulation;cellular component organization;cellular membrane organization;cellular metabolic process;cellular process;endosome organization;establishment of localization;exocytosis;Golgi vesicle transport;macromolecule metabolic process;membrane organization;metabolic process;organelle organization;protein transport;response to stimulus;secretion;signal transduction;transport;vesicle-m…	cell part;cell projection;cytoplasmic membrane-bounded vesicle;cytosol;endosome;intracellular membrane-bounded organelle;intracellular organelle;macromolecular complex;membrane;microtubule organizing center;neuron projection;organelle;protein complex;synapse;vesicle	3D-structure;Acetylation;Celljunction;Cellprojection;Completeproteome;Cytoplasm;Cytoplasmicvesicle;Cytoskeleton;Diseasemutation;Endosome;Golgiapparatus;Guanine-nucleotidereleasingfactor;Membrane;Phosphoprotein;Polymorphism;Proteintransport;Referenceproteome;Synapse;Transport	3	3.11574	0.010611	1.38311	1.20284	1.46388	0.02112	2.35157	1.34724	0.590607	0.401552	0.968462	0.558985	0.443371	0.666792	0.563074	0.357451	4.44384	0.0967372	1.0473	0.995497	1.82527	0.0655192	1.86734	1.17995	4.0975	0.00190164	2.43041	2.11761	>sp|Q9Y6D5|BIG2_HUMAN Brefeldin A-inhibited guanine nucleotide-exchange protein 2 OS=Homo sapiens GN=ARFGEF2 PE=1 SV=3	Q9Y6D5	Brefeldin A-inhibited guanine nucleotide-exchange protein 2	BIG2_HUMAN	22.111	21.8949	21.6131
ARHGAP18	+	+						+	+	enzyme activator activity;enzyme regulator activity;GTPase activator activity;GTPase regulator activity;nucleoside-triphosphatase regulator activity	biological regulation;cellular process;response to stimulus;signal transduction	cell part;cytosol	Alternativesplicing;Completeproteome;GTPaseactivation;Polymorphism;Referenceproteome	15	3.51594	0.00233121	2.14363	1.81178	3.23258	0.0166106	1.71807	1.4639	2.04129	0.572086	-0.425566	-0.390449	0.249083	0.873242	-0.157052	-0.124735	0.48764	0.568583	-0.369835	-0.278037	4.76907	0.0316648	1.93085	1.62733	2.09442	0.0078124	1.7738	1.30232	>sp|Q8N392|RHG18_HUMAN Rho GTPase-activating protein 18 OS=Homo sapiens GN=ARHGAP18 PE=1 SV=3	Q8N392	Rho GTPase-activating protein 18	RHG18_HUMAN	19.3377	19.1242	18.7661
ARHGDIA	+	+						+	+	enzyme activator activity;enzyme regulator activity;GDP-dissociation inhibitor activity;GTPase activator activity;GTPase regulator activity;nucleoside-triphosphatase regulator activity;Rho GDP-dissociation inhibitor activity;small GTPase regulator activity	biological regulation;cellular component movement;cellular process;response to stimulus;signal transduction	cell part;cytoskeleton;cytosol;extracellular organelle;intracellular non-membrane-bounded organelle;intracellular organelle;organelle;vesicle	3D-structure;Acetylation;Alternativesplicing;Completeproteome;Cytoplasm;Directproteinsequencing;Diseasemutation;GTPaseactivation;Phosphoprotein;Referenceproteome	11	3.62015	0.00247297	2.17243	1.84954	3.84189	0.0150135	1.72721	1.53958	1.1577	0.588291	-0.44522	-0.377035	2.03692	0.515298	-0.840093	-0.679799	1.78167	0.140336	-1.0627	-0.838324	4.6719	0.0315506	1.94982	1.63187	2.05832	0.0380343	1.10972	0.90081	>sp|P52565|GDIR1_HUMAN Rho GDP-dissociation inhibitor 1 OS=Homo sapiens GN=ARHGDIA PE=1 SV=3	P52565	Rho GDP-dissociation inhibitor 1	GDIR1_HUMAN	21.4743	21.7461	21.5727
ARHGEF1	+	+						+	+	enzyme activator activity;enzyme regulator activity;GTPase activator activity;GTPase regulator activity;guanyl-nucleotide exchange factor activity;nucleoside-triphosphatase regulator activity;Ras guanyl-nucleotide exchange factor activity;Rho guanyl-nucleotide exchange factor activity;small GTPase regulator activity	biological regulation;cell proliferation;cellular process;response to stimulus;signal transduction	cell part;cytoplasm;cytosol;membrane;plasma membrane	3D-structure;Alternativesplicing;Coiledcoil;Completeproteome;Cytoplasm;GTPaseactivation;Guanine-nucleotidereleasingfactor;Membrane;Phosphoprotein;Polymorphism;Referenceproteome	9	4.6727	0.00296356	2.14754	1.96399	3.32713	0.0204942	1.56235	1.35944	1.57288	0.462324	-0.585187	-0.499724	0.354249	0.809529	-0.234867	-0.182286	0.828251	0.415874	-0.527461	-0.407242	4.15227	0.03435	1.85494	1.51706	2.33554	0.00797519	1.62007	1.26257	>sp|Q92888|ARHG1_HUMAN Rho guanine nucleotide exchange factor 1 OS=Homo sapiens GN=ARHGEF1 PE=1 SV=2	Q92888	Rho guanine nucleotide exchange factor 1	ARHG1_HUMAN	18.2185	18.1876	18.1181
ARID3A	+							+	+	binding;chromatin binding;DNA binding;nucleic acid binding;regulatory region DNA binding;regulatory region nucleic acid binding;RNA polymerase II regulatory region DNA binding;RNA polymerase II regulatory region sequence-specific DNA binding;sequence-specific DNA binding;transcription regulatory region DNA binding;transcription regulatory region sequence-specific DNA binding		cell part;cytoplasm;Golgi apparatus;intracellular membrane-bounded organelle;intracellular non-membrane-bounded organelle;intracellular organelle;nucleolus;nucleoplasm;organelle	3D-structure;Completeproteome;Cytoplasm;DNA-binding;Nucleus;Phosphoprotein;Polymorphism;Referenceproteome;Transcription;Transcriptionregulation	4	0.981049	0.0190824	-2.07135	-1.04109	0.664059	0.138069	-1.4591	-0.731065	1.25197	0.463894	0.612254	0.497943	0.00393476	0.99669	0.00407934	0.00302566	0.321429	0.644463	0.310206	0.222233	1.42819	0.0968202	-1.76523	-1.04554	0.775283	0.0461135	-1.76115	-0.860451	>sp|Q99856|ARI3A_HUMAN AT-rich interactive domain-containing protein 3A OS=Homo sapiens GN=ARID3A PE=1 SV=2	Q99856	AT-rich interactive domain-containing protein 3A	ARI3A_HUMAN	12.6834	14.9622	11.6461
ARL6IP5	+	+				+		+	+		amine transport;amino acid transport;biological regulation;cellular homeostasis;cellular ion homeostasis;cellular process;establishment of localization;homeostatic process;ion transport;organic acid transport;regulation of transport;transport	cell part;endoplasmic reticulum;extracellular organelle;intracellular membrane-bounded organelle;intracellular organelle;membrane;organelle;vesicle	Acetylation;Completeproteome;Cytoplasm;Directproteinsequencing;Endoplasmicreticulum;Membrane;Referenceproteome;Transmembrane;Transmembranehelix	6	4.86392	0.00165333	2.50656	2.28358	4.41396	0.00552066	2.87643	2.51121	1.3563	0.641983	0.369866	0.328056	4.76209	0.21839	-1.66878	-1.43664	3.70992	0.0311831	-1.48385	-1.33306	6.24481	0.0415455	2.69149	2.32586	2.8122	0.0378878	1.02271	0.902612	>sp|O75915|PRAF3_HUMAN PRA1 family protein 3 OS=Homo sapiens GN=ARL6IP5 PE=1 SV=1	O75915	PRA1 family protein 3	PRAF3_HUMAN	18.3	18.294	18.0421
ARMCX3	+	+						+			biological regulation;cellular localization;cellular process;localization	cell part	Completeproteome;Membrane;Phosphoprotein;Referenceproteome;Repeat;Transmembrane;Transmembranehelix	6	2.46112	0.00876942	1.6015	1.2724	1.87247	0.0791162	1.14441	0.900538	0.592188	0.632158	-0.457098	-0.339865	1.12146	0.570953	-0.687322	-0.516876	1.15609	0.219898	-0.915871	-0.66728	2.76514	0.0897242	1.37296	1.07332	1.05565	0.183015	0.685633	0.525315	>sp|Q9UH62|ARMX3_HUMAN Armadillo repeat-containing X-linked protein 3 OS=Homo sapiens GN=ARMCX3 PE=1 SV=1	Q9UH62	Armadillo repeat-containing X-linked protein 3	ARMX3_HUMAN	15.977	16.0221	16.3063
ARPC2	+	+						+	+	structural constituent of cytoskeleton;structural molecule activity	biological regulation;cellular component movement;cellular component organization;cellular process;cytoskeleton organization;immune system process;locomotion;organelle organization;regulation of organelle organization;response to chemical stimulus;response to external stimulus;response to stimulus;response to stress;signal transduction	cell leading edge;cell part;cell projection;cytoplasm;cytoskeleton;cytosol;endosome;extracellular organelle;Golgi apparatus;intracellular membrane-bounded organelle;intracellular non-membrane-bounded organelle;intracellular organelle;macromolecular complex;membrane;neuron projection;organelle;plasma membrane;protein complex;synapse;vesicle	Acetylation;Actin-binding;Celljunction;Cellprojection;Completeproteome;Cytoplasm;Cytoskeleton;Directproteinsequencing;Referenceproteome;Synapse;Synaptosome	20	4.66776	0.00809009	1.44538	1.35962	3.27157	0.0139524	1.84028	1.5573	0.975095	0.639173	0.394903	0.331916	0.167517	0.917176	0.0971368	0.0792452	0.606314	0.619064	0.294588	0.241906	4.41162	0.0391455	1.64283	1.39238	2.92988	0.00641379	1.73997	1.43704	>sp|O15144|ARPC2_HUMAN Actin-related protein 2/3 complex subunit 2 OS=Homo sapiens GN=ARPC2 PE=1 SV=1	O15144	Actin-related protein 2/3 complex subunit 2	ARPC2_HUMAN	20.534	20.578	20.5013
ARPC3	+	+						+	+	structural constituent of cytoskeleton;structural molecule activity	biological regulation;cellular component movement;cellular component organization;cellular process;cytoskeleton organization;immune system process;locomotion;organelle organization;regulation of organelle organization;response to chemical stimulus;response to external stimulus;response to stimulus;response to stress;signal transduction	cell part;cell projection;cytoskeleton;cytosol;extracellular organelle;intracellular non-membrane-bounded organelle;intracellular organelle;macromolecular complex;membrane;organelle;protein complex;vesicle	Acetylation;Actin-binding;Cellprojection;Completeproteome;Cytoplasm;Cytoskeleton;Directproteinsequencing;Phosphoprotein;Referenceproteome	11	3.07258	0.00911483	1.45434	1.2519	4.61059	0.011544	1.86871	1.72342	1.15877	0.616332	0.414366	0.354718	0.280967	0.877725	0.145546	0.119608	0.63802	0.564443	0.352729	0.282325	4.47791	0.0376828	1.66152	1.41081	3.05934	0.00587	1.80707	1.50273	>sp|O15145|ARPC3_HUMAN Actin-related protein 2/3 complex subunit 3 OS=Homo sapiens GN=ARPC3 PE=1 SV=3	O15145	Actin-related protein 2/3 complex subunit 3	ARPC3_HUMAN	19.8195	19.6532	19.6955
ARPC4	+	+						+	+	binding;enzyme binding;protein binding;structural constituent of cytoskeleton;structural molecule activity	biological regulation;cellular component assembly;cellular component organization;cellular macromolecular complex assembly;cellular process;cytoskeleton organization;immune system process;locomotion;macromolecular complex assembly;organelle organization;protein complex assembly;protein polymerization;regulation of organelle organization;response to chemical stimulus;response to external stimulus;…	cell part;cell projection;cytosol;extracellular organelle;macromolecular complex;organelle;protein complex;vesicle	Acetylation;Actin-binding;Alternativesplicing;Cellprojection;Completeproteome;Cytoplasm;Cytoskeleton;Directproteinsequencing;Referenceproteome	9	4.0794	0.00497717	1.7702	1.5966	2.32701	0.0199879	1.82496	1.38182	0.0565811	0.963732	0.0547625	0.0410401	0.132537	0.92504	0.0897999	0.0714433	0.197881	0.861844	0.117181	0.0954422	4.08607	0.0364511	1.79758	1.4722	3.09403	0.0044	1.88738	1.56347	>sp|P59998|ARPC4_HUMAN Actin-related protein 2/3 complex subunit 4 OS=Homo sapiens GN=ARPC4 PE=1 SV=3	P59998	Actin-related protein 2/3 complex subunit 4	ARPC4_HUMAN	20.2508	20.2359	20.1305
ARPC5	+	+						+	+	structural constituent of cytoskeleton;structural molecule activity	biological regulation;cell motility;cellular component movement;cellular component organization;cellular process;cytoskeleton organization;immune system process;locomotion;organelle organization;regulation of organelle organization;response to chemical stimulus;response to external stimulus;response to stimulus;response to stress;signal transduction	cell part;cell projection;cytoplasm;cytoskeleton;cytosol;extracellular organelle;intracellular non-membrane-bounded organelle;intracellular organelle;macromolecular complex;organelle;protein complex;vesicle	Acetylation;Actin-binding;Alternativesplicing;Cellprojection;Completeproteome;Cytoplasm;Cytoskeleton;Directproteinsequencing;Referenceproteome;Ublconjugation	7	2.53679	0.00708239	1.79784	1.40787	2.18585	0.0331658	1.49355	1.16026	0.319435	0.756643	-0.304286	-0.218851	0.40867	0.784869	0.262996	0.204319	0.136229	0.879292	0.110853	0.0852503	3.24071	0.04939	1.64569	1.28877	3.74537	0.00370107	1.90869	1.67061	>sp|O15511|ARPC5_HUMAN Actin-related protein 2/3 complex subunit 5 OS=Homo sapiens GN=ARPC5 PE=1 SV=3	O15511	Actin-related protein 2/3 complex subunit 5	ARPC5_HUMAN	19.0108	19.1465	19.2088
ASF1B	+	+						+	+		biological regulation;biosynthetic process;cell differentiation;cellular component assembly;cellular component organization;cellular macromolecular complex assembly;cellular metabolic process;cellular nitrogen compound metabolic process;cellular process;chromatin modification;chromatin organization;chromosome organization;developmental process;macromolecular complex assembly;macromolecule metabol…	cell part;macromolecular complex;nucleoplasm;protein complex	Chaperone;Chromatinregulator;Completeproteome;Developmentalprotein;Differentiation;Nucleus;Phosphoprotein;Referenceproteome;Spermatogenesis;Transcription;Transcriptionregulation	2	2.96482	0.00252459	-2.14389	-1.7092	3.07725	0.0101924	-2.23627	-1.79195	0.623308	0.909466	-0.0923802	-0.0866068	1.34644	0.594723	-0.588947	-0.474273	0.80318	0.36167	-0.635137	-0.465101	5.40411	0.0288727	-2.19008	-1.87186	2.50507	0.00426994	-2.77903	-1.93434	>sp|Q9NVP2|ASF1B_HUMAN Histone chaperone ASF1B OS=Homo sapiens GN=ASF1B PE=1 SV=1	Q9NVP2	Histone chaperone ASF1B	ASF1B_HUMAN	12.666	12.1115	12.9518
ASUN	+	+						+	+		biological regulation;cell division;cell motility;cellular component movement;cellular component organization;cellular localization;cellular process;cytoskeleton organization;localization;locomotion;mitosis;nuclear division;organelle fission;organelle localization;organelle organization;regulation of cell cycle;regulation of mitotic cell cycle	cell part;cytoplasm;intracellular membrane-bounded organelle;intracellular organelle;nucleus;organelle	Alternativesplicing;Cellcycle;Celldivision;Coiledcoil;Completeproteome;Cytoplasm;Mitosis;Phosphoprotein;Polymorphism;Referenceproteome	6	3.11344	0.0250936	-1.0586	-0.94954	3.09628	0.0118196	-2.14067	-1.73381	1.92887	0.175595	-1.08207	-0.868109	0.681084	0.618941	0.623266	0.429893	0.0811603	0.916644	0.0822318	0.0605584	2.33339	0.0709348	-1.59964	-1.14977	1.30735	0.0779191	-0.976373	-0.723309	>sp|Q9NVM9|ASUN_HUMAN Protein asunder homolog OS=Homo sapiens GN=ASUN PE=1 SV=2	Q9NVM9	Protein asunder homolog	ASUN_HUMAN	14.6759	14.6366	14.8369
ATG9A	+	+						+	+		autophagy;catabolic process;cellular component assembly;cellular component organization;cellular localization;cellular membrane organization;cellular metabolic process;cellular process;establishment of localization;immune system process;localization;membrane invagination;membrane organization;metabolic process;organelle assembly;organelle organization;protein transport;response to stimulus;respon…	cell part;endosome;intracellular membrane-bounded organelle;intracellular organelle;membrane;organelle;vacuole;vesicle	Acetylation;Alternativesplicing;Autophagy;Completeproteome;Cytoplasmicvesicle;Endoplasmicreticulum;Endosome;Glycoprotein;Golgiapparatus;Membrane;Phosphoprotein;Polymorphism;Proteintransport;Referenceproteome;Transmembrane;Transmembranehelix;Transport	3	4.62626	0.0022963	2.86947	2.54323	1.61751	0.0160351	2.53192	1.47523	0.177883	0.778934	-0.337544	-0.196164	0.589704	0.624857	-0.617718	-0.411591	1.62886	0.234378	-0.78649	-0.644303	3.0645	0.028	2.70069	1.81643	3.27104	0.00321951	2.08298	1.72755	>sp|Q7Z3C6|ATG9A_HUMAN Autophagy-related protein 9A OS=Homo sapiens GN=ATG9A PE=1 SV=3	Q7Z3C6	Autophagy-related protein 9A	ATG9A_HUMAN	16.8662	17.085	17.0729
ATP2B4	+	+						+	+	active transmembrane transporter activity;adenyl nucleotide binding;adenyl ribonucleotide binding;ATP binding;ATPase activity;ATPase activity, coupled;ATPase activity, coupled to movement of substances;ATPase activity, coupled to transmembrane movement of ions;ATPase activity, coupled to transmembrane movement of ions, phosphorylative mechanism;ATPase activity, coupled to transmembrane movement o…	biological regulation;cellular homeostasis;cellular ion homeostasis;cellular process;coagulation;establishment of localization;homeostatic process;ion transport;multicellular organismal process;regulation of body fluid levels;regulation of protein modification process;response to abiotic stimulus;response to chemical stimulus;response to endogenous stimulus;response to stimulus;response to stress…	cell part;macromolecular complex;membrane;plasma membrane;protein complex	3D-structure;Alternativesplicing;ATP-binding;Calcium;Calciumtransport;Calmodulin-binding;Cellmembrane;Completeproteome;Directproteinsequencing;Hydrolase;Iontransport;Magnesium;Membrane;Metal-binding;Nucleotide-binding;Phosphoprotein;Referenceproteome;Transmembrane;Transmembranehelix;Transport	21	3.90306	0.00210169	2.98512	2.48092	2.23074	0.0149036	2.14038	1.52892	0.995345	0.366761	-0.844733	-0.604234	0.759033	0.626305	-0.578075	-0.418229	2.53144	0.135149	-1.00044	-0.866448	3.4926	0.0282783	2.56275	1.84129	3.62001	0.00311811	1.98467	1.71166	>sp|P23634|AT2B4_HUMAN Plasma membrane calcium-transporting ATPase 4 OS=Homo sapiens GN=ATP2B4 PE=1 SV=2	P23634	Plasma membrane calcium-transporting ATPase 4	AT2B4_HUMAN	20.3905	20.0244	19.9038
B2M	+	+					+	+	+	binding;identical protein binding;protein binding	biological regulation;cell activation;cell differentiation;cellular metabolic process;cellular process;developmental process;homeostatic process;immune system process;macromolecule metabolic process;metabolic process;primary metabolic process;protein folding;protein metabolic process;response to biotic stimulus;response to chemical stimulus;response to drug;response to stimulus;response to stress…	cell part;cytoplasm;extracellular organelle;extracellular region;extracellular space;Golgi apparatus;intracellular membrane-bounded organelle;intracellular organelle;macromolecular complex;membrane;MHC protein complex;organelle;plasma membrane;protein complex;vesicle	3D-structure;Amyloid;Amyloidosis;Completeproteome;Directproteinsequencing;Diseasemutation;Disulfidebond;Glycation;Glycoprotein;Immunity;Immunoglobulindomain;MHCI;Pyrrolidonecarboxylicacid;Referenceproteome;Secreted;Signal	4	2.26781	0.00242384	2.76752	1.8389	2.42702	0.0114845	2.39455	1.71643	0.228028	0.746004	-0.372977	-0.227373	0.0220416	0.978689	-0.0328644	-0.0217508	0.123957	0.794275	-0.219353	-0.13317	3.22563	0.0282791	2.58103	1.79627	2.48287	0.0039403	2.54817	1.81238	>sp|P61769|B2MG_HUMAN Beta-2-microglobulin OS=Homo sapiens GN=B2M PE=1 SV=1	P61769	Beta-2-microglobulin	B2MG_HUMAN	17.9362	17.8723	17.8651
BAG2	+	+				+		+	+	binding;identical protein binding;protein binding	cellular metabolic process;cellular process;macromolecule metabolic process;metabolic process;primary metabolic process;protein folding;protein metabolic process;response to abiotic stimulus;response to heat;response to stimulus;response to stress	cell part;cytosol	Acetylation;Alternativesplicing;Chaperone;Coiledcoil;Completeproteome;Phosphoprotein;Referenceproteome	10	5.68408	0.00563636	3.30493	3.05963	4.84729	0.00746667	3.30016	2.921	0.0135634	0.998237	-0.0047671	-0.00427069	5.1344	0.289972	-1.36174	-1.22027	3.21579	0.0432251	-1.36412	-1.1974	8.57807	0.0606154	3.30254	3.03319	3.67799	0.00389513	1.94081	1.68655	>sp|O95816|BAG2_HUMAN BAG family molecular chaperone regulator 2 OS=Homo sapiens GN=BAG2 PE=1 SV=1	O95816	BAG family molecular chaperone regulator 2	BAG2_HUMAN	19.8186	19.7568	19.585
BAP18	+	+						+	+	binding;chromatin binding;DNA binding;nucleic acid binding	cellular component organization;cellular process;chromatin modification;chromatin organization;chromosome organization;organelle organization	cell part;chromatin remodeling complex;histone methyltransferase complex;macromolecular complex;protein complex	Alternativesplicing;Chromatinregulator;Completeproteome;DNA-binding;Nucleus;Phosphoprotein;Referenceproteome	5	2.74709	0.00239216	2.44315	1.83596	1.10574	0.0407918	2.04307	1.09322	0.189295	0.754107	-0.400081	-0.221209	0.18453	0.827626	-0.256953	-0.165909	1.79868	0.414137	-0.456994	-0.41032	2.19163	0.0377068	2.24311	1.41503	2.37963	0.0060381	1.98616	1.48486	>sp|Q8IXM2|BAP18_HUMAN Chromatin complexes subunit BAP18 OS=Homo sapiens GN=BAP18 PE=1 SV=1	Q8IXM2	Chromatin complexes subunit BAP18	BAP18_HUMAN	19.5177	19.721	20.5764
BAZ1A	+	+						+	+	binding;cation binding;ion binding;metal ion binding;transition metal ion binding;zinc ion binding	biological regulation;biosynthetic process;cellular component organization;cellular metabolic process;cellular nitrogen compound metabolic process;cellular process;chromatin modification;chromatin organization;chromosome organization;DNA metabolic process;DNA replication;macromolecule metabolic process;metabolic process;nitrogen compound metabolic process;nucleobase-containing compound metabolic …	cell part;chromatin remodeling complex;chromosome;intracellular non-membrane-bounded organelle;intracellular organelle;macromolecular complex;nuclear chromosome;organelle;protein complex	Alternativesplicing;Bromodomain;Coiledcoil;Completeproteome;Metal-binding;Nucleus;Phosphoprotein;Polymorphism;Referenceproteome;Transcription;Transcriptionregulation;Zinc;Zinc-finger	2	1.67994	0.00810413	-2.18838	-1.37462	1.73431	0.0150686	-2.46078	-1.49994	0.238835	0.786608	-0.272399	-0.187963	2.26276	0.371071	1.26907	0.961083	1.70826	0.132482	1.13287	0.871194	2.81637	0.0324286	-2.32458	-1.58909	0.900771	0.0894164	-1.05551	-0.682465	>sp|Q9NRL2|BAZ1A_HUMAN Bromodomain adjacent to zinc finger domain protein 1A OS=Homo sapiens GN=BAZ1A PE=1 SV=2	Q9NRL2	Bromodomain adjacent to zinc finger domain protein 1A	BAZ1A_HUMAN	13.1883	14.9034	13.4896
BCAT1	+	+						+	+	branched-chain-amino-acid transaminase activity;catalytic activity;L-isoleucine transaminase activity;L-leucine transaminase activity;L-valine transaminase activity;transaminase activity;transferase activity;transferase activity, transferring nitrogenous groups	amine metabolic process;biosynthetic process;catabolic process;cell proliferation;cellular amino acid metabolic process;cellular ketone metabolic process;cellular metabolic process;cellular nitrogen compound metabolic process;cellular process;metabolic process;nitrogen compound metabolic process;organic acid metabolic process;primary metabolic process;small molecule metabolic process	cell part;cytosol;intracellular membrane-bounded organelle;intracellular organelle;mitochondrion;organelle	3D-structure;Acetylation;Alternativesplicing;Amino-acidbiosynthesis;Aminotransferase;Branched-chainaminoacidbiosynthesis;Completeproteome;Cytoplasm;Polymorphism;Pyridoxalphosphate;Referenceproteome;Transferase	14	3.24517	0.00349161	-1.94646	-1.62851	4.62406	0.0084843	-2.25439	-2.04776	0.663117	0.719438	-0.307939	-0.254403	0.43494	0.825048	0.205304	0.169246	0.0657343	0.942956	0.0513344	0.0403544	5.22735	0.0281832	-2.10043	-1.79033	3.16129	0.00432558	-1.89512	-1.57949	>sp|P54687|BCAT1_HUMAN Branched-chain-amino-acid aminotransferase, cytosolic OS=Homo sapiens GN=BCAT1 PE=1 SV=3	P54687	Branched-chain-amino-acid aminotransferase, cytosolic	BCAT1_HUMAN	17.1156	17.0405	17.1957
BOD1L1	+	+						+	+	binding;DNA binding;nucleic acid binding		cell part;nucleoplasm	Acetylation;Completeproteome;Isopeptidebond;Phosphoprotein;Polymorphism;Referenceproteome;Ublconjugation	7	1.65787	0.0107859	-1.75294	-1.18305	1.68986	0.0454434	-1.4916	-1.06492	0.240584	0.79315	0.261346	0.182982	0.0703024	0.936172	-0.081782	-0.0576622	0.0283698	0.956005	0.0488911	0.0309632	2.54609	0.0636108	-1.62227	-1.19146	1.41944	0.0164323	-1.70405	-1.09311	>sp|Q8NFC6|BD1L1_HUMAN Biorientation of chromosomes in cell division protein 1-like 1 OS=Homo sapiens GN=BOD1L1 PE=1 SV=2	Q8NFC6	Biorientation of chromosomes in cell division protein 1-like 1	BD1L1_HUMAN	16.7635	16.9099	17.7986
BPHL	+	+						+	+	catalytic activity;hydrolase activity	amine metabolic process;cellular amino acid metabolic process;cellular ketone metabolic process;cellular metabolic process;cellular nitrogen compound metabolic process;cellular process;metabolic process;nitrogen compound metabolic process;organic acid metabolic process;primary metabolic process;response to chemical stimulus;response to stimulus;small molecule metabolic process	cell part;extracellular organelle;intracellular membrane-bounded organelle;intracellular organelle;mitochondrion;organelle;vesicle	3D-structure;Acetylation;Alternativesplicing;Completeproteome;Directproteinsequencing;Hydrolase;Referenceproteome;Signal	2	1.29243	0.00924528	-2.27502	-1.24649	0.868362	0.0698166	-1.89964	-0.941417	0.209389	0.753582	0.375379	0.221549	0.0125304	0.987924	-0.0215176	-0.0135979	0.102874	0.843671	0.166172	0.105102	1.69604	0.0573453	-2.08733	-1.22975	1.0493	0.0167973	-2.10885	-1.08468	>sp|Q86WA6|BPHL_HUMAN Valacyclovir hydrolase OS=Homo sapiens GN=BPHL PE=1 SV=1	Q86WA6	Valacyclovir hydrolase	BPHL_HUMAN	9.5812	11.6904	12.1257
C1QBP	+	+						+	+	adrenergic receptor binding;binding;carbohydrate binding;complement binding;complement component C1q binding;glycosaminoglycan binding;G-protein-coupled receptor binding;hyaluronic acid binding;kininogen binding;mRNA binding;nucleic acid binding;opsonin binding;pattern binding;polysaccharide binding;protein binding;protein binding transcription factor activity;receptor binding;RNA binding;transcr…	biological regulation;biosynthetic process;cell death;cellular component assembly;cellular component organization;cellular macromolecular complex assembly;cellular metabolic process;cellular nitrogen compound metabolic process;cellular process;coagulation;death;immune system process;macromolecular complex assembly;macromolecule metabolic process;metabolic process;mRNA metabolic process;mRNA proce…	cell part;cell surface;cytoplasm;cytosol;extracellular space;intracellular membrane-bounded organelle;intracellular non-membrane-bounded organelle;intracellular organelle;membrane;mitochondrion;nucleolus;nucleus;organelle;plasma membrane	3D-structure;Acetylation;Adaptiveimmunity;Apoptosis;Cellmembrane;Complementpathway;Completeproteome;Cytoplasm;Directproteinsequencing;Host-virusinteraction;Immunity;Innateimmunity;Membrane;Mitochondrion;mRNAprocessing;mRNAsplicing;Nucleus;Phosphoprotein;Referenceproteome;Ribosomebiogenesis;Secreted;Transcription;Transcriptionregulation;Transitpeptide	8	3.13041	0.00717512	-1.66873	-1.4151	1.54703	0.0227057	-2.14914	-1.31033	0.302365	0.679571	-0.480405	-0.291841	0.77972	0.588099	0.7197	0.491069	1.00082	0.428955	0.479497	0.391508	2.38154	0.0462268	-1.90894	-1.31015	2.34239	0.0253828	-1.18924	-0.985321	>sp|Q07021|C1QBP_HUMAN Complement component 1 Q subcomponent-binding protein, mitochondrial OS=Homo sapiens GN=C1QBP PE=1 SV=1	Q07021	Complement component 1 Q subcomponent-binding protein, mitochondrial	C1QBP_HUMAN	20.7572	20.7968	20.4471
CAD	+	+						+		adenyl nucleotide binding;adenyl ribonucleotide binding;amine binding;amino acid binding;aspartate binding;aspartate carbamoyltransferase activity;ATP binding;binding;carbamoyl-phosphate synthase (ammonia) activity;carbamoyl-phosphate synthase (glutamine-hydrolyzing) activity;carbon-nitrogen ligase activity, with glutamine as amido-N-donor;carboxyl- or carbamoyltransferase activity;carboxylic aci…	amine metabolic process;anatomical structure development;anatomical structure morphogenesis;biological regulation;biosynthetic process;catabolic process;cellular amide metabolic process;cellular amino acid metabolic process;cellular aromatic compound metabolic process;cellular ketone metabolic process;cellular metabolic process;cellular nitrogen compound metabolic process;cellular process;develop…	cell body;cell part;cell projection;cytosol;extracellular organelle;intracellular membrane-bounded organelle;intracellular organelle;macromolecular complex;membrane;neuronal cell body;nucleoplasm;nucleus;organelle;plasma membrane;protein complex;vesicle	3D-structure;Acetylation;Allostericenzyme;ATP-binding;Completeproteome;Cytoplasm;Directproteinsequencing;Hydrolase;Ligase;Metal-binding;Multifunctionalenzyme;Nucleotide-binding;Nucleus;Phosphoprotein;Polymorphism;Pyrimidinebiosynthesis;Referenceproteome;Repeat;Transferase;Zinc	64	2.95609	0.0229291	-1.10845	-0.979036	2.23402	0.0227041	-1.73554	-1.31122	0.868712	0.489818	-0.627096	-0.469425	1.44753	0.525993	0.816308	0.620971	1.30566	0.394918	0.50276	0.425922	2.64353	0.0846917	-1.422	-1.09038	1.74617	0.184075	-0.605689	-0.523785	>sp|P27708|PYR1_HUMAN CAD protein OS=Homo sapiens GN=CAD PE=1 SV=3	P27708	CAD protein	PYR1_HUMAN	20.5052	20.2867	20.3159
CALD1	+	+						+	+	actin binding;binding;calmodulin binding;cytoskeletal protein binding;protein binding;tropomyosin binding	cellular component movement;cellular process;multicellular organismal process;muscle contraction	cell part;cytoskeleton;cytosol;intracellular non-membrane-bounded organelle;intracellular organelle;membrane;organelle;plasma membrane	Actin-binding;Alternativesplicing;Calmodulin-binding;Completeproteome;Cytoplasm;Cytoskeleton;Muscleprotein;Phosphoprotein;Polymorphism;Referenceproteome;Repeat	31	3.44264	0.00486076	1.80149	1.55202	1.59056	0.0813673	1.20416	0.893695	0.796448	0.518172	-0.597325	-0.443624	2.13006	0.330947	1.54438	1.0917	1.2912	0.134637	1.24572	0.857775	2.73976	0.0714647	1.50282	1.14826	2.59455	0.00182677	3.04721	2.09721	>sp|Q05682|CALD1_HUMAN Caldesmon OS=Homo sapiens GN=CALD1 PE=1 SV=3	Q05682	Caldesmon	CALD1_HUMAN	23.7328	23.3913	23.384
CALU	+	+						+	+	binding;calcium ion binding;cation binding;ion binding;metal ion binding	biological regulation;cell activation;cellular process;coagulation;establishment of localization;exocytosis;multicellular organismal process;regulation of body fluid levels;secretion;transport;vesicle-mediated transport	cell part;cytoplasmic membrane-bounded vesicle;endoplasmic reticulum;extracellular region;Golgi apparatus;intracellular membrane-bounded organelle;intracellular organelle;membrane;organelle;vesicle	Acetylation;Alternativesplicing;Calcium;Completeproteome;Directproteinsequencing;Endoplasmicreticulum;Glycoprotein;Metal-binding;Phosphoprotein;Polymorphism;Referenceproteome;Repeat;Sarcoplasmicreticulum;Secreted;Signal	16	2.64923	0.00482008	1.99191	1.54856	2.77033	0.0121858	2.17136	1.6835	0.196123	0.857978	0.179454	0.132775	0.837937	0.637769	-0.525145	-0.397712	0.457343	0.533003	-0.435418	-0.308647	4.08638	0.03	2.08164	1.65746	1.9091	0.0121303	1.55649	1.14508	>sp|O43852|CALU_HUMAN Calumenin OS=Homo sapiens GN=CALU PE=1 SV=2	O43852	Calumenin	CALU_HUMAN	23.821	23.5172	23.3208
CAP1	+	+						+	+		biological regulation;cell activation;cell motility;cellular component movement;cellular component organization;cellular membrane organization;cellular process;coagulation;cytoskeleton organization;endocytosis;establishment of localization;establishment or maintenance of cell polarity;exocytosis;locomotion;membrane invagination;membrane organization;multicellular organismal process;organelle orga…	cell part;cytoskeleton;extracellular organelle;intracellular non-membrane-bounded organelle;intracellular organelle;membrane;organelle;plasma membrane;vesicle	3D-structure;Acetylation;Actin-binding;Alternativesplicing;Cellmembrane;Completeproteome;Directproteinsequencing;Membrane;Phosphoprotein;Polymorphism;Referenceproteome	25	3.94564	0.00736102	1.54136	1.39824	3.30347	0.0359063	1.2776	1.13687	0.794785	0.745289	-0.263761	-0.228705	0.930508	0.733624	0.302377	0.258585	0.381067	0.779169	0.170497	0.143511	4.80996	0.055156	1.40948	1.24268	3.31339	0.00589767	1.71186	1.46955	>sp|Q01518|CAP1_HUMAN Adenylyl cyclase-associated protein 1 OS=Homo sapiens GN=CAP1 PE=1 SV=5	Q01518	Adenylyl cyclase-associated protein 1	CAP1_HUMAN	23.3896	23.2827	23.2938
CAPN2	+	+						+	+	binding;calcium ion binding;calcium-dependent cysteine-type endopeptidase activity;catalytic activity;cation binding;cysteine-type endopeptidase activity;cysteine-type peptidase activity;cytoskeletal protein binding;endopeptidase activity;hydrolase activity;ion binding;metal ion binding;peptidase activity;peptidase activity, acting on L-amino acid peptides;protein binding	anatomical structure development;anatomical structure formation involved in morphogenesis;biological regulation;cellular process;developmental process;macromolecule metabolic process;metabolic process;primary metabolic process;protein maturation;protein metabolic process;proteolysis;proteolysis involved in cellular protein catabolic process;regulation of organelle organization;response to chemica…	cell part;cell projection;cytoplasm;cytoskeleton;cytosol;endoplasmic reticulum;extracellular organelle;Golgi apparatus;intracellular membrane-bounded organelle;intracellular non-membrane-bounded organelle;intracellular organelle;membrane;neuron projection;nucleus;organelle;plasma membrane;pseudopodium;vesicle	3D-structure;Acetylation;Alternativesplicing;Calcium;Cellmembrane;Completeproteome;Cytoplasm;Directproteinsequencing;Hydrolase;Membrane;Metal-binding;Polymorphism;Protease;Referenceproteome;Repeat;Thiolprotease	33	4.95643	0.00217544	2.39799	2.20292	1.87555	0.0287324	1.71584	1.22109	0.757797	0.478991	-0.682154	-0.482467	0.0943251	0.927828	0.0943365	0.0689863	0.589678	0.667318	-0.24674	-0.207888	3.2024	0.0336371	2.05691	1.52216	3.68203	0.004125	2.15125	1.84387	>sp|P17655|CAN2_HUMAN Calpain-2 catalytic subunit OS=Homo sapiens GN=CAPN2 PE=1 SV=6	P17655	Calpain-2 catalytic subunit	CAN2_HUMAN	22.1778	22.1432	22.1129
CAPNS1	+	+						+	+	binding;calcium ion binding;calcium-dependent cysteine-type endopeptidase activity;catalytic activity;cation binding;cysteine-type endopeptidase activity;cysteine-type peptidase activity;endopeptidase activity;hydrolase activity;ion binding;metal ion binding;peptidase activity;peptidase activity, acting on L-amino acid peptides	biological regulation;cellular component disassembly;cellular component organization;cellular process;extracellular matrix organization;extracellular structure organization;macromolecule metabolic process;metabolic process;primary metabolic process;protein metabolic process;proteolysis	cell part;cytoplasm;cytosol;extracellular organelle;membrane;organelle;plasma membrane;vesicle	3D-structure;Acetylation;Calcium;Cellmembrane;Completeproteome;Cytoplasm;Directproteinsequencing;Membrane;Metal-binding;Polymorphism;Referenceproteome;Repeat	7	2.62015	0.00845161	1.6726	1.34373	3.1767	0.00986103	2.23333	1.8108	0.819162	0.529834	0.56073	0.42576	0.662792	0.700422	0.384428	0.299489	1.25757	0.308688	0.664793	0.532639	3.64228	0.0334746	1.95296	1.52295	4.32368	0.00255639	2.33739	2.07853	>sp|P04632|CPNS1_HUMAN Calpain small subunit 1 OS=Homo sapiens GN=CAPNS1 PE=1 SV=1	P04632	Calpain small subunit 1	CPNS1_HUMAN	19.4621	19.6282	19.7492
CARD11	+	+						+	+	binding;CARD domain binding;catalytic activity;guanylate kinase activity;kinase activity;nucleobase-containing compound kinase activity;nucleotide kinase activity;phosphotransferase activity, phosphate group as acceptor;protein binding;protein domain specific binding;transferase activity;transferase activity, transferring phosphorus-containing groups	biological regulation;cellular metabolic process;cellular nitrogen compound metabolic process;cellular process;immune system process;metabolic process;nitrogen compound metabolic process;nucleobase-containing compound metabolic process;nucleobase-containing small molecule metabolic process;nucleotide metabolic process;phosphorus metabolic process;primary metabolic process;response to stimulus;res…	cell part;cytoplasm;cytosol;extracellular organelle;membrane;organelle;plasma membrane;vesicle	3D-structure;Coiledcoil;Completeproteome;Cytoplasm;Diseasemutation;Membrane;Phosphoprotein;Polymorphism;Referenceproteome	2	2.99945	0.00258101	2.17328	1.73517	1.6486	0.0133878	2.80225	1.57855	0.322686	0.620163	0.628976	0.349439	0.224581	0.777475	0.335157	0.208952	0.735964	0.362926	0.649645	0.462495	2.49255	0.0324646	2.48777	1.58719	2.87655	0.00259542	2.82292	2.0861	>sp|Q9BXL7|CAR11_HUMAN Caspase recruitment domain-containing protein 11 OS=Homo sapiens GN=CARD11 PE=1 SV=3	Q9BXL7	Caspase recruitment domain-containing protein 11	CAR11_HUMAN	18.2093	18.0246	17.824
CAST	+	+						+	+	cysteine-type endopeptidase inhibitor activity;endopeptidase inhibitor activity;endopeptidase regulator activity;enzyme inhibitor activity;enzyme regulator activity;peptidase inhibitor activity;peptidase regulator activity	biological regulation	cell part;cytoplasm;cytosol;membrane	Acetylation;Alternativesplicing;Completeproteome;Phosphoprotein;Polymorphism;Proteaseinhibitor;Referenceproteome;Repeat;Thiolproteaseinhibitor	23	3.78096	0.00219469	3.09216	2.52194	2.89262	0.00911475	2.40196	1.85104	0.929218	0.447238	-0.6902	-0.512337	0.773353	0.619561	-0.595393	-0.42904	1.13187	0.216502	-0.940493	-0.67624	4.17802	0.0362899	2.74706	2.07043	2.46108	0.00419753	2.15167	1.59678	>sp|P20810|ICAL_HUMAN Calpastatin OS=Homo sapiens GN=CAST PE=1 SV=4	P20810	Calpastatin	ICAL_HUMAN	21.1262	20.8124	20.8575
CAV1	+	+						+	+	binding;channel inhibitor activity;channel regulator activity;cholesterol binding;enzyme activator activity;enzyme binding;enzyme regulator activity;identical protein binding;inward rectifier potassium channel inhibitor activity;ion channel binding;ion channel inhibitor activity;kinase binding;lipid binding;nitric-oxide synthase binding;patched binding;peptidase activator activity;peptidase regul…	anatomical structure development;anatomical structure formation involved in morphogenesis;biological regulation;cell communication;cell differentiation;cell motility;cellular component assembly;cellular component movement;cellular component organization;cellular homeostasis;cellular ion homeostasis;cellular lipid metabolic process;cellular membrane organization;cellular metabolic process;cellular…	cell cortex;cell part;cell projection;cilium;endoplasmic reticulum;endosome;intracellular;intracellular membrane-bounded organelle;intracellular organelle;lipid particle;macromolecular complex;membrane;organelle;plasma membrane;protein complex;vesicle	Acetylation;Alternativeinitiation;Cellmembrane;Completeproteome;Congenitalgeneralizedlipodystrophy;Directproteinsequencing;Diseasemutation;Golgiapparatus;Host-virusinteraction;Lipoprotein;Membrane;Palmitate;Phosphoprotein;Referenceproteome	11	4.5858	0.062	5.6617	4.49662	4.21037	0.0127143	4.37741	3.50438	1.63785	0.14098	-1.28429	-0.945699	0.00888779	0.990723	-0.0155671	-0.00978055	0.489216	0.409222	-0.657714	-0.414822	4.78889	0.0384	5.01956	3.38808	3.16636	0	5.00399	3.27906	>sp|Q03135|CAV1_HUMAN Caveolin-1 OS=Homo sapiens GN=CAV1 PE=1 SV=4	Q03135	Caveolin-1	CAV1_HUMAN	20.9047	20.8358	20.839
CAV2	+	+	+					+	+	binding;D1 dopamine receptor binding;dopamine receptor binding;G-protein-coupled receptor binding;identical protein binding;protein binding;protein dimerization activity;protein homodimerization activity;receptor binding	anatomical structure development;biological regulation;cell development;cellular component assembly;cellular component organization;cellular membrane organization;cellular process;developmental process;endocytosis;endoplasmic reticulum organization;establishment of localization;macromolecular complex assembly;membrane docking;membrane fusion;membrane invagination;membrane organization;mitochondri…	cell part;cytoplasmic membrane-bounded vesicle;Golgi apparatus;intracellular;intracellular membrane-bounded organelle;intracellular organelle;macromolecular complex;membrane;nucleus;organelle;plasma membrane;protein complex;vesicle	Alternativeinitiation;Alternativesplicing;Cellmembrane;Completeproteome;Cytoplasm;Golgiapparatus;Membrane;Nucleus;Phosphoprotein;Polymorphism;Referenceproteome	2	3.15683	0.00435088	4.24205	2.9286	3.10658	0.00837168	2.61765	2.03678	1.54623	0.0910711	-1.62441	-1.09451	0.78103	0.512024	1.24732	0.690732	0.18595	0.637109	0.435122	0.229814	3.0278	0.0387541	3.42985	2.10773	2.36348	0.00234783	4.67717	2.59389	>sp|P51636|CAV2_HUMAN Caveolin-2 OS=Homo sapiens GN=CAV2 PE=1 SV=2	P51636	Caveolin-2	CAV2_HUMAN	16.6752	16.3497	16.1424
CBL	+	+						+	+	acid-amino acid ligase activity;binding;calcium ion binding;catalytic activity;cation binding;ephrin receptor binding;ion binding;ligase activity;ligase activity, forming carbon-nitrogen bonds;metal ion binding;molecular transducer activity;nucleic acid binding transcription factor activity;protein binding;protein domain specific binding;receptor binding;sequence-specific DNA binding transcriptio…	biological regulation;cellular metabolic process;cellular process;macromolecule metabolic process;macromolecule modification;metabolic process;primary metabolic process;protein metabolic process;protein modification by small protein conjugation or removal;protein modification process;regulation of transport;response to chemical stimulus;response to endogenous stimulus;response to stimulus;signal …	cell part;cytoplasm;cytosol;intracellular membrane-bounded organelle;intracellular organelle;macromolecular complex;membrane;nucleus;organelle;plasma membrane;protein complex	3D-structure;Calcium;Cellmembrane;Completeproteome;Cytoplasm;Diseasemutation;Ligase;Membrane;Metal-binding;Phosphoprotein;Polymorphism;Proto-oncogene;Referenceproteome;Repeat;Ublconjugation;Ublconjugationpathway;Zinc;Zinc-finger	6	2.78509	0.00930012	-1.49576	-1.24871	2.81326	0.0181691	-1.73938	-1.41857	0.790476	0.765009	-0.243622	-0.213277	0.993674	0.768285	0.247273	0.218593	0.583248	0.829865	0.125462	0.114479	4.47268	0.0391164	-1.61757	-1.37861	2.62213	0.0122432	-1.3703	-1.14166	>sp|P22681|CBL_HUMAN E3 ubiquitin-protein ligase CBL OS=Homo sapiens GN=CBL PE=1 SV=2	P22681	E3 ubiquitin-protein ligase CBL	CBL_HUMAN	14.3748	14.1798	14.8127
CBX1	+	+						+	+	binding;chromatin binding;enzyme binding;protein binding	biological regulation	cell part;intracellular membrane-bounded organelle;intracellular non-membrane-bounded organelle;intracellular organelle;nucleoplasm;nucleus;organelle	3D-structure;Completeproteome;Directproteinsequencing;Nucleus;Phosphoprotein;Referenceproteome;Repeat;Ublconjugation	9	4.05863	0.0027374	-1.89094	-1.69203	3.76955	0.0212011	-1.48907	-1.34197	2.08549	0.594471	0.401872	0.371244	2.58078	0.472804	-0.912498	-0.760161	1.46453	0.275796	-0.711562	-0.580649	4.90212	0.0363542	-1.69001	-1.4621	3.40999	0.00184127	-2.60251	-2.10435	>sp|P83916|CBX1_HUMAN Chromobox protein homolog 1 OS=Homo sapiens GN=CBX1 PE=1 SV=1	P83916	Chromobox protein homolog 1	CBX1_HUMAN	18.3008	18.1411	17.9631
CBX3	+	+						+	+	binding;enzyme binding;identical protein binding;protein binding;protein domain specific binding	biological regulation;biosynthetic process;cellular component organization;cellular metabolic process;cellular nitrogen compound metabolic process;cellular process;chromatin modification;chromatin organization;chromosome organization;macromolecule metabolic process;metabolic process;nitrogen compound metabolic process;nucleobase-containing compound metabolic process;organelle organization;primary…	cell part;intracellular membrane-bounded organelle;intracellular non-membrane-bounded organelle;intracellular organelle;membrane;nuclear envelope;nucleoplasm;nucleus;organelle	3D-structure;Acetylation;Biologicalrhythms;Chromatinregulator;Completeproteome;Directproteinsequencing;Nucleus;Phosphoprotein;Referenceproteome;Repeat;Repressor;Transcription;Transcriptionregulation	7	3.00279	0.0101514	-1.42333	-1.22172	2.30542	0.0361847	-1.41439	-1.12972	0.0131511	0.99563	0.00894864	0.0073054	1.05695	0.712464	-0.332385	-0.284683	1.03671	0.561656	-0.327911	-0.285499	4.09261	0.0609978	-1.41886	-1.20852	3.14033	0.00593911	-1.75124	-1.47537	>sp|Q13185|CBX3_HUMAN Chromobox protein homolog 3 OS=Homo sapiens GN=CBX3 PE=1 SV=4	Q13185	Chromobox protein homolog 3	CBX3_HUMAN	19.0506	18.8627	18.5641
CBX5	+	+						+	+	binding;binding, bridging;chromatin binding;histone binding;methylated histone residue binding;protein binding;protein binding, bridging;repressing transcription factor binding;transcription factor binding	biological regulation;coagulation;multicellular organismal process;regulation of body fluid levels;viral reproduction	cell part;chromatin remodeling complex;histone methyltransferase complex;intracellular membrane-bounded organelle;intracellular non-membrane-bounded organelle;intracellular organelle;kinetochore;macromolecular complex;nuclear envelope;nucleolus;nucleoplasm;nucleus;organelle;protein complex;transcriptional repressor complex	3D-structure;Acetylation;Centromere;Chromosome;Completeproteome;Directproteinsequencing;Host-virusinteraction;Nucleus;Phosphoprotein;Referenceproteome;Repeat;Ublconjugation	9	5.18045	0.00326786	-2.1547	-2.01392	1.66517	0.011941	-3.12931	-1.68653	0.496536	0.434412	-0.974618	-0.524936	0.102161	0.888591	-0.185524	-0.110976	1.08467	0.313315	-0.672833	-0.520919	2.33535	0.0318316	-2.642	-1.60543	3.2183	0.00234343	-2.82753	-2.19497	>sp|P45973|CBX5_HUMAN Chromobox protein homolog 5 OS=Homo sapiens GN=CBX5 PE=1 SV=1	P45973	Chromobox protein homolog 5	CBX5_HUMAN	18.0181	17.9333	17.8884
CCDC117	+	+						+					Alternativesplicing;Coiledcoil;Completeproteome;Polymorphism;Referenceproteome	2	2.71674	0.0083432	-1.65687	-1.34871	1.59262	0.0294737	-1.8503	-1.20698	0.124988	0.869779	-0.193427	-0.123485	1.44428	0.502033	0.996739	0.719739	1.67254	0.193713	0.900025	0.723055	2.60894	0.051685	-1.75358	-1.27021	2.11682	0.100237	-0.756846	-0.656855	>sp|Q8IWD4|CC117_HUMAN Coiled-coil domain-containing protein 117 OS=Homo sapiens GN=CCDC117 PE=1 SV=1	Q8IWD4	Coiled-coil domain-containing protein 117	CC117_HUMAN	12.0014	12.1357	11.8317
CCDC6	+	+	+					+	+	structural constituent of cytoskeleton;structural molecule activity		cell part;cytoplasm;cytoskeleton;intracellular non-membrane-bounded organelle;intracellular organelle;organelle	Acetylation;Chromosomalrearrangement;Coiledcoil;Completeproteome;Cytoplasm;Cytoskeleton;Phosphoprotein;Polymorphism;Proto-oncogene;Referenceproteome;Repeat;SH3-binding	18	2.84965	0.0576993	-0.803338	-0.728872	2.44094	0.00819512	-2.94415	-1.98724	1.97734	0.0370938	-2.14081	-1.45431	0.375474	0.656932	0.669372	0.375297	0.72083	0.520164	-0.401035	-0.319681	1.3478	0.093773	-1.87375	-1.05946	1.94333	0.0306458	-1.20437	-0.947078	>sp|Q16204|CCDC6_HUMAN Coiled-coil domain-containing protein 6 OS=Homo sapiens GN=CCDC6 PE=1 SV=2	Q16204	Coiled-coil domain-containing protein 6	CCDC6_HUMAN	18.5818	18.4058	18.24
CCDC88A	+	+						+	+	actin binding;binding;cytoskeletal protein binding;enzyme binding;identical protein binding;kinase binding;lipid binding;microtubule binding;phosphatidylinositol binding;phospholipid binding;protein binding;protein dimerization activity;protein homodimerization activity;protein kinase B binding;protein kinase binding;tubulin binding	biological regulation;biosynthetic process;cell motility;cellular component assembly;cellular component movement;cellular component organization;cellular metabolic process;cellular nitrogen compound metabolic process;cellular process;DNA metabolic process;DNA replication;locomotion;macromolecule metabolic process;membrane organization;metabolic process;nitrogen compound metabolic process;nucleoba…	cell part;cell projection;cytoplasmic membrane-bounded vesicle;cytosol;endoplasmic reticulum;Golgi apparatus;intracellular membrane-bounded organelle;intracellular organelle;membrane;organelle;plasma membrane;vesicle	Alternativesplicing;Cellmembrane;Cellprojection;Coiledcoil;Completeproteome;Cytoplasm;Cytoplasmicvesicle;DNAreplication;Membrane;Neurogenesis;Phosphoprotein;Referenceproteome	7	2.55654	0.0258795	1.10007	0.942306	2.64075	0.0273887	1.5101	1.23963	0.788904	0.6413	0.410028	0.330696	0.861661	0.711051	-0.347413	-0.287783	0.435957	0.810673	-0.142399	-0.124917	3.28687	0.0898667	1.30508	1.07347	3.20823	0.0440725	0.957668	0.87204	>sp|Q3V6T2|GRDN_HUMAN Girdin OS=Homo sapiens GN=CCDC88A PE=1 SV=2	Q3V6T2	Girdin	GRDN_HUMAN	18.4208	18.6894	18.7202
CCNA2	+	+						+	+		anatomical structure morphogenesis;biological regulation;cell cycle;cell division;cellular component organization;cellular process;developmental process;mitosis;mitotic cell cycle;nuclear division;organelle fission;organelle organization;regulation of cell cycle;regulation of mitotic cell cycle;regulation of protein modification process;response to chemical stimulus;response to DNA damage stimulu…	cell part;cytoplasm;intracellular membrane-bounded organelle;intracellular organelle;nucleoplasm;nucleus;organelle	3D-structure;Acetylation;Cellcycle;Celldivision;Completeproteome;Cyclin;Cytoplasm;Host-virusinteraction;Mitosis;Nucleus;Phosphoprotein;Polymorphism;Referenceproteome;Ublconjugation	2	2.90773	0.002954	2.06047	1.64444	2.51533	0.0240154	1.60002	1.2802	3.29695	0.51995	-0.460457	-0.440719	0.212113	0.790421	-0.321098	-0.199717	0.241873	0.554557	-0.551326	-0.290285	4.09728	0.0345873	1.83024	1.49514	0.742816	0.0636683	1.50915	0.781034	>sp|P20248|CCNA2_HUMAN Cyclin-A2 OS=Homo sapiens GN=CCNA2 PE=1 SV=2	P20248	Cyclin-A2	CCNA2_HUMAN	14.9376	14.2678	14.1301
CCNB1	+	+						+		binding;catalytic activity;enzyme binding;histone kinase activity;kinase activity;kinase binding;patched binding;phosphotransferase activity, alcohol group as acceptor;protein binding;protein kinase activity;protein kinase binding;receptor binding;transferase activity;transferase activity, transferring phosphorus-containing groups	anatomical structure development;anatomical structure morphogenesis;biological regulation;catabolic process;cell cycle;cell development;cell division;cell maturation;cellular component assembly;cellular component disassembly;cellular component organization;cellular membrane organization;cellular metabolic process;cellular process;chromatin modification;chromatin organization;chromosome organizati…	cell part;centrosome;cytoplasm;cytosol;intracellular membrane-bounded organelle;intracellular non-membrane-bounded organelle;intracellular organelle;macromolecular complex;membrane;microtubule organizing center;nucleoplasm;nucleus;organelle;protein complex	3D-structure;Acetylation;Alternativesplicing;Cellcycle;Celldivision;Completeproteome;Cyclin;Cytoplasm;Cytoskeleton;Mitosis;Nucleus;Phosphoprotein;Referenceproteome;Ublconjugation	7	1.87931	0.0104179	-1.69668	-1.21224	2.55583	0.0125093	-2.20731	-1.65208	0.905635	0.555464	-0.51063	-0.404264	2.78742	0.360468	1.21454	0.975767	1.72362	0.173374	0.959226	0.766408	3.32429	0.0355676	-1.952	-1.4809	1.05931	0.161427	-0.737455	-0.555672	>sp|P14635|CCNB1_HUMAN G2/mitotic-specific cyclin-B1 OS=Homo sapiens GN=CCNB1 PE=1 SV=1	P14635	G2/mitotic-specific cyclin-B1	CCNB1_HUMAN	14.17	13.8311	14.9112
CCNK	+	+						+	+	binding;catalytic activity;cyclin-dependent protein kinase activity;enzyme binding;kinase activity;kinase binding;phosphotransferase activity, alcohol group as acceptor;protein binding;protein kinase activity;protein kinase binding;protein serine/threonine kinase activity;RNA polymerase II carboxy-terminal domain kinase activity;transferase activity;transferase activity, transferring phosphorus-c…	biological regulation;biosynthetic process;cell division;cellular component organization;cellular metabolic process;cellular nitrogen compound metabolic process;cellular process;developmental process;embryo development;macromolecule metabolic process;macromolecule modification;metabolic process;mitosis;nitrogen compound metabolic process;nuclear division;nucleobase-containing compound metabolic p…	cell part;intracellular membrane-bounded organelle;intracellular organelle;nucleus;organelle	3D-structure;Alternativesplicing;Cellcycle;Celldivision;Completeproteome;Cyclin;Mitosis;Nucleus;Phosphoprotein;Referenceproteome;Transcription;Transcriptionregulation	3	2.63298	0.00977468	-1.50305	-1.23382	2.50257	0.0233438	-1.62214	-1.29224	0.265589	0.89408	-0.119097	-0.101004	0.46105	0.826663	-0.201044	-0.167683	0.442322	0.667204	-0.260593	-0.207982	4.26125	0.0436517	-1.5626	-1.32372	2.31863	0.00717091	-1.76364	-1.34468	>sp|O75909|CCNK_HUMAN Cyclin-K OS=Homo sapiens GN=CCNK PE=1 SV=2	O75909	Cyclin-K	CCNK_HUMAN	13.1835	12.7659	13.4567
CD109	+	+						+	+	binding;cytokine binding;endopeptidase inhibitor activity;endopeptidase regulator activity;enzyme inhibitor activity;enzyme regulator activity;growth factor binding;peptidase inhibitor activity;peptidase regulator activity;protein binding;serine-type endopeptidase inhibitor activity;transforming growth factor beta binding	anatomical structure development;anatomical structure formation involved in morphogenesis;biological regulation;cellular process;developmental process;molting cycle;multicellular organismal process;regulation of protein modification process;syncytium formation	cell part;cell surface;extracellular space;membrane;plasma membrane	Alternativesplicing;Baitregion;Cellmembrane;Completeproteome;Directproteinsequencing;Disulfidebond;Glycoprotein;GPI-anchor;Lipoprotein;Membrane;Polymorphism;Proteaseinhibitor;Referenceproteome;Serineproteaseinhibitor;Signal;Thioesterbond	12	3.84102	0.001984	2.94473	2.43792	2.23073	0.0130736	2.31421	1.6156	0.64296	0.522881	-0.630527	-0.437028	0.348116	0.752835	-0.338968	-0.238312	0.787568	0.356796	-0.654231	-0.47293	3.74523	0.0298182	2.62947	1.92499	2.45491	0.00368794	2.2905	1.67024	>sp|Q6YHK3|CD109_HUMAN CD109 antigen OS=Homo sapiens GN=CD109 PE=1 SV=2	Q6YHK3	CD109 antigen	CD109_HUMAN	18.8539	18.7554	18.422
CD151	+	+						+	+	binding;integrin binding;protein binding;protein complex binding;receptor binding	biological adhesion;cell activation;cell adhesion;cell junction organization;cell motility;cell proliferation;cellular component assembly;cellular component movement;cellular component organization;cellular process;extracellular matrix organization;extracellular structure organization;immune system process;locomotion	cell part;cytosol;membrane;plasma membrane	Bloodgroupantigen;Completeproteome;Deafness;Epidermolysisbullosa;Glycoprotein;Lipoprotein;Membrane;Palmitate;Polymorphism;Referenceproteome;Transmembrane;Transmembranehelix	4	2.13383	0.00203279	3.78753	2.1601	2.94361	0.00541844	3.38235	2.40497	0.181531	0.756834	-0.405179	-0.219046	0.160442	0.809438	0.325374	0.182226	0.0374036	0.919989	0.122784	0.0581055	3.37113	0.042383	3.58494	2.27776	2.04221	0.00212844	3.91031	2.14156	>sp|P48509|CD151_HUMAN CD151 antigen OS=Homo sapiens GN=CD151 PE=1 SV=3	P48509	CD151 antigen	CD151_HUMAN	17.9957	17.9195	17.7482
CD248	+	+						+	+	binding;calcium ion binding;carbohydrate binding;cation binding;extracellular matrix binding;ion binding;metal ion binding	anatomical structure development;biological regulation;cell motility;cellular component movement;cellular process;developmental process;locomotion	cell part;cytoplasm;extracellular matrix;extracellular organelle;organelle;proteinaceous extracellular matrix;vesicle	Alternativesplicing;Calcium;Completeproteome;Disulfidebond;EGF-likedomain;Glycoprotein;Lectin;Membrane;Phosphoprotein;Polymorphism;Referenceproteome;Signal;Transmembrane;Transmembranehelix	2	3.15668	0.00256995	2.73135	2.1193	0.94119	0.0140359	6.92546	1.55923	0.535624	0.141352	4.19411	0.94183	0.165541	0.692396	-1.2121	-0.315089	0.209799	0.498524	0.884953	0.33596	0.955958	0.0435344	4.82841	1.32467	1.05572	0.00648437	3.6163	1.38579	>sp|Q9HCU0|CD248_HUMAN Endosialin OS=Homo sapiens GN=CD248 PE=1 SV=1	Q9HCU0	Endosialin	CD248_HUMAN	14.1203	14.2164	14.269
CD3EAP	+	+						+	+	catalytic activity;DNA-directed RNA polymerase activity;nucleotidyltransferase activity;RNA polymerase activity;transferase activity;transferase activity, transferring phosphorus-containing groups	biological regulation;biosynthetic process;cellular metabolic process;cellular nitrogen compound metabolic process;cellular process;macromolecule metabolic process;metabolic process;nitrogen compound metabolic process;nucleobase-containing compound metabolic process;primary metabolic process;regulation of gene expression, epigenetic;response to stimulus;RNA metabolic process;signal transduction;t…	cell part;chromosome;cytoplasm;intracellular membrane-bounded organelle;intracellular non-membrane-bounded organelle;intracellular organelle;macromolecular complex;mitochondrion;nucleolus;nucleoplasm;nucleus;organelle;protein complex;RNA polymerase complex;transcription factor complex	Acetylation;Alternativesplicing;Chromosome;Completeproteome;DNA-directedRNApolymerase;Nucleus;Phosphoprotein;Polymorphism;Referenceproteome;Transcription	5	1.85305	0.0098291	-1.74746	-1.23146	1.33492	0.0150425	-3.34454	-1.53969	0.643712	0.25546	-1.59708	-0.753222	0.762855	0.501517	1.37021	0.720311	1.42372	0.348249	0.571664	0.481653	1.52807	0.0449479	-2.546	-1.31573	1.39751	0.0496215	-1.17579	-0.844524	>sp|O15446|RPA34_HUMAN DNA-directed RNA polymerase I subunit RPA34 OS=Homo sapiens GN=CD3EAP PE=1 SV=1	O15446	DNA-directed RNA polymerase I subunit RPA34	RPA34_HUMAN	15.5951	14.7563	14.2827
CD44	+	+	+			+		+	+	binding;carbohydrate binding;catalytic activity;collagen binding;glycosaminoglycan binding;hexosaminidase activity;hyaluronic acid binding;hyalurononglucosaminidase activity;hydrolase activity;hydrolase activity, acting on glycosyl bonds;hydrolase activity, hydrolyzing O-glycosyl compounds;pattern binding;polysaccharide binding;protein binding	amine metabolic process;anatomical structure development;anatomical structure morphogenesis;biological adhesion;biological regulation;carbohydrate metabolic process;catabolic process;cell adhesion;cell motility;cellular component disassembly;cellular component movement;cellular component organization;cellular process;coagulation;developmental process;extracellular matrix organization;extracellula…	cell part;cell surface;cytoplasm;extracellular organelle;Golgi apparatus;intracellular membrane-bounded organelle;intracellular organelle;macromolecular complex;membrane;organelle;plasma membrane;protein complex;receptor complex;vesicle	3D-structure;Alternativesplicing;Bloodgroupantigen;Celladhesion;Cellmembrane;Completeproteome;Directproteinsequencing;Disulfidebond;Glycoprotein;Membrane;Phosphoprotein;Polymorphism;Proteoglycan;Pyrrolidonecarboxylicacid;Receptor;Referenceproteome;Signal;Transmembrane;Transmembranehelix	9	4.79335	0.0248	5.06594	4.20209	2.26535	0.00979012	2.73258	1.82245	1.95335	0.0328282	-2.33336	-1.53227	0.16462	0.789701	-0.377187	-0.199543	1.44136	0.0820075	-1.54387	-1.03069	2.62832	0.0394	3.89926	2.11997	2.75922	0.00154286	3.52207	2.39068	>sp|P16070|CD44_HUMAN CD44 antigen OS=Homo sapiens GN=CD44 PE=1 SV=3	P16070	CD44 antigen	CD44_HUMAN	21.2578	21.0018	20.9473
CD47	+	+				+		+	+	molecular transducer activity;receptor activity;signal transducer activity;signaling receptor activity;thrombospondin receptor activity	biological adhesion;biological regulation;cell adhesion;cell motility;cellular component movement;cellular component organization;cellular process;coagulation;extracellular matrix organization;extracellular structure organization;immune system process;locomotion;multicellular organismal process;multi-organism process;regulation of body fluid levels;regulation of transport;response to biotic stimu…	cell part;extracellular organelle;membrane;organelle;plasma membrane;vesicle	3D-structure;Alternativesplicing;Celladhesion;Cellmembrane;Completeproteome;Directproteinsequencing;Disulfidebond;Glycoprotein;Immunoglobulindomain;Membrane;Pyrrolidonecarboxylicacid;Referenceproteome;Signal;Transmembrane;Transmembranehelix	2	3.3761	0.00288189	2.38598	1.95343	1.35978	0.0305166	2.01517	1.19067	0.219768	0.750968	-0.370808	-0.223719	1.60977	0.407545	-1.30319	-0.894632	3.30076	0.0330066	-1.48859	-1.3007	2.64829	0.0344223	2.20058	1.49729	1.57946	0.0812642	0.897388	0.711648	>sp|Q08722|CD47_HUMAN Leukocyte surface antigen CD47 OS=Homo sapiens GN=CD47 PE=1 SV=1	Q08722	Leukocyte surface antigen CD47	CD47_HUMAN	15.9998	15.4856	15.258
CD59	+	+						+	+	binding;complement binding;protein binding	biological regulation;cell activation;cellular process;coagulation;immune system process;multicellular organismal process;regulation of body fluid levels;response to stimulus;response to stress;signal transduction	cell part;cell surface;extracellular organelle;extracellular region;extracellular space;membrane;organelle;plasma membrane;vesicle	3D-structure;Cellmembrane;Completeproteome;Directproteinsequencing;Diseasemutation;Disulfidebond;Glycation;Glycoprotein;GPI-anchor;Hereditaryhemolyticanemia;Lipoprotein;Membrane;Referenceproteome;Secreted;Signal	4	5.44969	0.0112727	4.46987	3.97628	5.64063	0.0209412	4.33422	3.91242	0.344352	0.87822	-0.135653	-0.116623	1.92706	0.661166	0.411158	0.366516	1.18365	0.540945	0.343332	0.302131	8.63759	0.016	4.40205	3.94428	6.8411	0	4.81321	4.54101	>sp|P13987|CD59_HUMAN CD59 glycoprotein OS=Homo sapiens GN=CD59 PE=1 SV=1	P13987	CD59 glycoprotein	CD59_HUMAN	20.9123	20.9239	20.9597
CD63	+							+	+		biological adhesion;biological regulation;cell activation;cell adhesion;cell motility;cellular component movement;cellular localization;cellular process;coagulation;developmental maturation;developmental process;endosome transport;establishment of localization;exocytosis;localization;locomotion;multicellular organismal process;pigmentation;protein transport;regulation of body fluid levels;regulat…	cell part;cell surface;cytoplasmic membrane-bounded vesicle;extracellular organelle;intracellular membrane-bounded organelle;intracellular organelle;membrane;organelle;plasma membrane;vesicle	Alternativesplicing;Cellmembrane;Completeproteome;Directproteinsequencing;Endosome;Glycoprotein;Lipoprotein;Lysosome;Membrane;Palmitate;Proteintransport;Referenceproteome;Transmembrane;Transmembranehelix;Transport	5	2.98043	0.00231646	2.29346	1.80656	1.1935	0.137604	1.02833	0.731902	1.27697	0.178682	-1.26513	-0.863753	0.121963	0.883633	-0.17868	-0.115211	0.967184	0.274469	-0.811245	-0.582427	1.8253	0.0837496	1.66089	1.09403	2.00876	0.0123333	1.48221	1.12283	>sp|P08962|CD63_HUMAN CD63 antigen OS=Homo sapiens GN=CD63 PE=1 SV=2	P08962	CD63 antigen	CD63_HUMAN	20.1312	19.8518	19.8051
CD81	+	+						+	+	antigen binding;binding;MHC class II protein complex binding;MHC protein complex binding	biological regulation;biosynthetic process;cell proliferation;cellular lipid metabolic process;cellular metabolic process;cellular process;interspecies interaction between organisms;lipid metabolic process;localization;locomotion;macromolecule metabolic process;macromolecule modification;metabolic process;multi-organism process;phosphorus metabolic process;primary metabolic process;protein metabo…	cell part;extracellular organelle;membrane;organelle;plasma membrane;vesicle	3D-structure;Completeproteome;Disulfidebond;Host-virusinteraction;Membrane;Referenceproteome;Transmembrane;Transmembranehelix	4	5.49219	0.00635897	3.43073	3.13891	4.56906	0.00561765	2.75919	2.44717	2.01136	0.384818	-0.671541	-0.58662	0.0831164	0.948049	0.0576878	0.046058	0.87821	0.619181	-0.278083	-0.242348	5.39329	0.0396757	3.09496	2.49366	4.75843	0	3.15265	2.78861	>sp|P60033|CD81_HUMAN CD81 antigen OS=Homo sapiens GN=CD81 PE=1 SV=1	P60033	CD81 antigen	CD81_HUMAN	21.2401	21.1053	21.1085
CD97	+	+						+	+	binding;calcium ion binding;cation binding;G-protein coupled receptor activity;ion binding;metal ion binding;molecular transducer activity;receptor activity;signal transducer activity;signaling receptor activity;transmembrane signaling receptor activity	biological adhesion;biological regulation;cell adhesion;cell communication;cell-cell signaling;cellular component movement;cellular process;immune system process;response to stimulus;response to stress;signal transduction;signaling	cell part;extracellular organelle;extracellular space;membrane;organelle;plasma membrane;vesicle	Alternativesplicing;Calcium;Celladhesion;Cellmembrane;Completeproteome;Disulfidebond;EGF-likedomain;Glycoprotein;G-proteincoupledreceptor;Membrane;Phosphoprotein;Polymorphism;Receptor;Referenceproteome;Repeat;Secreted;Signal;Transducer;Transmembrane;Transmembranehelix	9	1.35245	0.0295235	1.33029	0.911288	2.29663	0.0289965	1.55072	1.21358	0.161109	0.844837	0.220431	0.145604	0.759576	0.638527	-0.540965	-0.398514	0.385718	0.551447	-0.430749	-0.292994	2.338	0.0910822	1.4405	1.06576	2.08487	0.0687528	0.899539	0.75927	>sp|P48960|CD97_HUMAN CD97 antigen OS=Homo sapiens GN=CD97 PE=1 SV=4	P48960	CD97 antigen	CD97_HUMAN	18.4937	18.7118	18.8757
CDC42	+	+						+	+	apolipoprotein A-I receptor binding;apolipoprotein receptor binding;binding;catalytic activity;enzyme binding;GTP binding;GTPase activity;guanyl nucleotide binding;guanyl ribonucleotide binding;hydrolase activity;hydrolase activity, acting on acid anhydrides;hydrolase activity, acting on acid anhydrides, in phosphorus-containing anhydrides;identical protein binding;kinase binding;nucleoside-triph…	anatomical structure development;anatomical structure formation involved in morphogenesis;anatomical structure morphogenesis;biological adhesion;biological regulation;cell adhesion;cell communication;cell development;cell differentiation;cell junction organization;cell-cell signaling;cellular component assembly;cellular component movement;cellular component organization;cellular localization;cell…	apical part of cell;cell body;cell part;cell projection;cytoplasm;cytoplasmic membrane-bounded vesicle;cytosol;extracellular organelle;filopodium;intracellular membrane-bounded organelle;intracellular non-membrane-bounded organelle;intracellular organelle;membrane;microtubule organizing center;midbody;neuron projection;neuronal cell body;organelle;plasma membrane;vesicle	3D-structure;Alternativesplicing;Cellmembrane;Completeproteome;Cytoplasm;Cytoskeleton;Differentiation;Directproteinsequencing;GTP-binding;Lipoprotein;Membrane;Methylation;Neurogenesis;Nucleotide-binding;Phosphoprotein;Prenylation;Referenceproteome	8	4.61593	0.00601493	1.60152	1.49393	3.22001	0.0167254	1.72167	1.46489	0.260411	0.893455	0.120152	0.101495	0.762393	0.750904	-0.286406	-0.240944	0.434364	0.709717	-0.22633	-0.185039	5.41754	0.0367909	1.6616	1.47254	2.50444	0.0121854	1.37519	1.13075	>sp|P60953|CDC42_HUMAN Cell division control protein 42 homolog OS=Homo sapiens GN=CDC42 PE=1 SV=2	P60953	Cell division control protein 42 homolog	CDC42_HUMAN	19.8466	19.9594	19.8974
CDK1	+	+						+	+	adenyl nucleotide binding;adenyl ribonucleotide binding;ATP binding;binding;catalytic activity;cyclin-dependent protein kinase activity;histone kinase activity;kinase activity;nucleotide binding;phosphotransferase activity, alcohol group as acceptor;protein kinase activity;protein serine/threonine kinase activity;purine nucleotide binding;purine ribonucleoside triphosphate binding;purine ribonucl…	aging;anatomical structure development;anatomical structure morphogenesis;biological regulation;biosynthetic process;catabolic process;cell cycle;cell death;cell development;cell differentiation;cell division;cell motility;cellular component assembly;cellular component disassembly;cellular component movement;cellular component organization;cellular localization;cellular membrane organization;cell…	cell part;centrosome;cytoplasm;cytosol;extracellular organelle;intracellular membrane-bounded organelle;intracellular non-membrane-bounded organelle;intracellular organelle;macromolecular complex;membrane;microtubule organizing center;midbody;mitochondrion;nucleoplasm;nucleus;organelle;protein complex;vesicle	3D-structure;Acetylation;Alternativesplicing;Apoptosis;ATP-binding;Cellcycle;Celldivision;Completeproteome;Cytoplasm;Cytoskeleton;Isopeptidebond;Kinase;Mitochondrion;Mitosis;Nucleotide-binding;Nucleus;Phosphoprotein;Referenceproteome;Serine/threonine-proteinkinase;Transferase;Ublconjugation	15	1.99527	0.00842194	-1.8752	-1.33128	1.96632	0.0129892	-2.50305	-1.60865	0.766003	0.505311	-0.627855	-0.455872	0.115564	0.920344	0.101433	0.0763613	0.960477	0.695495	-0.212494	-0.192548	2.91957	0.0324561	-2.18912	-1.54378	2.11156	0.00588399	-2.08769	-1.46881	>sp|P06493|CDK1_HUMAN Cyclin-dependent kinase 1 OS=Homo sapiens GN=CDK1 PE=1 SV=3	P06493	Cyclin-dependent kinase 1	CDK1_HUMAN	17.935	16.52	17.2208
CELF1	+	+						+	+	binding;BRE binding;mRNA binding;nucleic acid binding;nucleotide binding;RNA binding;translation regulator activity;translation regulator activity, nucleic acid binding;translation repressor activity;translation repressor activity, nucleic acid binding	anatomical structure development;biological regulation;cell development;cellular component assembly;cellular component organization;cellular macromolecular complex assembly;cellular metabolic process;cellular nitrogen compound metabolic process;cellular process;developmental process;embryo development;gene silencing;macromolecular complex assembly;macromolecule metabolic process;metabolic process…	cell part;cytoplasm;intracellular membrane-bounded organelle;intracellular organelle;macromolecular complex;membrane;nucleoplasm;nucleus;organelle;ribonucleoprotein complex	3D-structure;Acetylation;Activator;Alternativesplicing;Completeproteome;Cytoplasm;mRNAprocessing;mRNAsplicing;Nucleus;Phosphoprotein;Referenceproteome;Repeat;RNA-binding	9	2.70345	0.0073677	-1.81626	-1.4501	3.02603	0.0316215	-1.35642	-1.1743	0.825894	0.600205	0.459834	0.36552	0.706448	0.716507	-0.343478	-0.276848	0.162726	0.870105	-0.113561	-0.0899556	3.56449	0.0506864	-1.58634	-1.28335	3.54307	0.00406969	-1.92982	-1.66038	>sp|Q92879|CELF1_HUMAN CUGBP Elav-like family member 1 OS=Homo sapiens GN=CELF1 PE=1 SV=2	Q92879	CUGBP Elav-like family member 1	CELF1_HUMAN	16.1244	16.0261	16.3724
CENPK	+	+						+	+		biological regulation;cell cycle;cellular component assembly;cellular component organization;cellular macromolecular complex assembly;cellular process;chromatin modification;chromatin organization;chromosome organization;macromolecular complex assembly;mitotic cell cycle;organelle organization;response to stimulus;signal transduction	cell part;cytosol;intracellular non-membrane-bounded organelle;intracellular organelle;kinetochore;macromolecular complex;nucleoplasm;organelle;protein complex	Centromere;Chromosomalrearrangement;Chromosome;Coiledcoil;Completeproteome;Kinetochore;Nucleus;Referenceproteome	2	1.89555	0.0202381	1.33	1.0154	2.53549	0.0233113	1.62533	1.29963	0.303998	0.766099	0.295338	0.211655	0.976324	0.610831	-0.601056	-0.454111	0.492687	0.51638	-0.453387	-0.323575	2.96339	0.0699355	1.47766	1.1569	1.55451	0.0863454	0.876609	0.695902	>sp|Q9BS16|CENPK_HUMAN Centromere protein K OS=Homo sapiens GN=CENPK PE=1 SV=1	Q9BS16	Centromere protein K	CENPK_HUMAN	17.2491	17.3639	17.271
CEP131	+	+						+		binding;identical protein binding;protein binding;protein complex binding;protein dimerization activity;protein homodimerization activity	biological regulation;cell cycle;cell differentiation;cellular component movement;cellular component organization;cellular process;cytoskeleton-dependent intracellular transport;developmental process;establishment of localization;mitotic cell cycle;multicellular organismal development;multicellular organismal process;organelle organization;regulation of cell cycle;regulation of organelle organiza…	cell part;cell projection;centrosome;cytoplasmic membrane-bounded vesicle;cytoskeleton;cytosol;intracellular membrane-bounded organelle;intracellular non-membrane-bounded organelle;intracellular organelle;membrane;microtubule organizing center;nucleoplasm;nucleus;organelle;vesicle	Alternativesplicing;Cellcycle;Cellprojection;Ciliumbiogenesis/degradation;Completeproteome;Cytoplasm;Cytoplasmicvesicle;Cytoskeleton;Developmentalprotein;Differentiation;Phosphoprotein;Polymorphism;Referenceproteome;Spermatogenesis;Transport;Ublconjugation	4	3.34194	0.0101629	-1.38208	-1.22212	2.85595	0.00822609	-2.7296	-2.02821	1.77037	0.119909	-1.34752	-1.00407	1.63021	0.372396	1.43318	0.95769	2.67697	0.212402	0.759425	0.68583	2.35103	0.039614	-2.05584	-1.37155	2.199	0.161141	-0.622656	-0.556567	>sp|Q9UPN4|CP131_HUMAN Centrosomal protein of 131 kDa OS=Homo sapiens GN=CEP131 PE=1 SV=3	Q9UPN4	Centrosomal protein of 131 kDa	CP131_HUMAN	14.9866	15.1117	15.3266
CGNL1	+	+				+		+	+	catalytic activity;hydrolase activity;hydrolase activity, acting on acid anhydrides;hydrolase activity, acting on acid anhydrides, in phosphorus-containing anhydrides;motor activity;nucleoside-triphosphatase activity;pyrophosphatase activity		cell part;macromolecular complex;protein complex	Alternativesplicing;Celljunction;Chromosomalrearrangement;Coiledcoil;Completeproteome;Phosphoprotein;Polymorphism;Referenceproteome;Tightjunction	8	2.81771	0.00349296	4.38393	2.79507	1.61502	0.01169	3.27669	1.69895	0.615309	0.362413	-1.10724	-0.612387	0.719601	0.522019	-1.1048	-0.626774	1.15668	0.0968322	-1.65842	-0.99055	2.94226	0.0384	3.83031	2.22074	1.54199	0.0058408	2.72552	1.50177	>sp|Q0VF96|CGNL1_HUMAN Cingulin-like protein 1 OS=Homo sapiens GN=CGNL1 PE=1 SV=2	Q0VF96	Cingulin-like protein 1	CGNL1_HUMAN	19.3491	19.2592	20.8502
CHAF1A	+	+						+	+	binding;chromatin binding;chromo shadow domain binding;identical protein binding;protein binding;protein domain specific binding;unfolded protein binding	biosynthetic process;cell cycle;cellular component assembly;cellular component organization;cellular macromolecular complex assembly;cellular metabolic process;cellular nitrogen compound metabolic process;cellular process;chromatin organization;chromosome organization;DNA metabolic process;DNA repair;DNA replication;macromolecular complex assembly;macromolecule metabolic process;metabolic process…	cell part;macromolecular complex;protein complex	Alternativesplicing;Cellcycle;Chaperone;Completeproteome;DNAdamage;DNArepair;DNAreplication;Nucleus;Phosphoprotein;Polymorphism;Referenceproteome	7	3.01286	0.00496552	-1.90585	-1.56264	2.63827	0.0281379	-1.49479	-1.22897	0.765166	0.641938	0.411063	0.329578	1.22304	0.615349	-0.534625	-0.431713	0.598674	0.585368	-0.329093	-0.264121	3.85783	0.0392905	-1.70032	-1.38566	3.31646	0.00408247	-2.23495	-1.83965	>sp|Q13111|CAF1A_HUMAN Chromatin assembly factor 1 subunit A OS=Homo sapiens GN=CHAF1A PE=1 SV=2	Q13111	Chromatin assembly factor 1 subunit A	CAF1A_HUMAN	14.831	14.3895	14.5303
CHD2	+	+				+		+		adenyl nucleotide binding;adenyl ribonucleotide binding;ATP binding;ATPase activity;ATPase activity, coupled;ATP-dependent DNA helicase activity;ATP-dependent helicase activity;binding;catalytic activity;core promoter binding;core promoter sequence-specific DNA binding;DNA binding;DNA helicase activity;DNA-dependent ATPase activity;helicase activity;histone binding;hydrolase activity;hydrolase ac…	anatomical structure development;biological regulation;biosynthetic process;cell differentiation;cellular component organization;cellular metabolic process;cellular nitrogen compound metabolic process;cellular process;chromatin modification;chromatin organization;chromosome organization;developmental process;DNA geometric change;DNA metabolic process;macromolecule metabolic process;metabolic proc…	cell part;extracellular organelle;intracellular membrane-bounded organelle;intracellular non-membrane-bounded organelle;intracellular organelle;nucleolus;nucleoplasm;nucleus;organelle;vesicle	Alternativesplicing;ATP-binding;Chromatinregulator;Completeproteome;Diseasemutation;DNA-binding;Epilepsy;Helicase;Hydrolase;Myogenesis;Nucleotide-binding;Nucleus;Phosphoprotein;Polymorphism;Referenceproteome;Repeat;Transcription;Transcriptionregulation	2	2.45704	0.00848046	1.71149	1.34012	1.94271	0.00783764	3.37631	1.91627	0.969462	0.147988	1.66482	0.922627	1.65795	0.237488	-2.69979	-1.40541	1.0403	0.0910394	-1.86738	-1.01315	1.91213	0.0364225	2.5439	1.446	0.0677915	0.872167	-0.155885	-0.0864745	>sp|O14647|CHD2_HUMAN Chromodomain-helicase-DNA-binding protein 2 OS=Homo sapiens GN=CHD2 PE=1 SV=2	O14647	Chromodomain-helicase-DNA-binding protein 2	CHD2_HUMAN	13.932	14.038	13.7915
CHD4	+	+						+	+	adenyl nucleotide binding;adenyl ribonucleotide binding;ATP binding;ATPase activity;ATPase activity, coupled;ATP-dependent DNA helicase activity;ATP-dependent helicase activity;binding;catalytic activity;cation binding;DNA binding;DNA helicase activity;DNA-dependent ATPase activity;helicase activity;hydrolase activity;hydrolase activity, acting on acid anhydrides;hydrolase activity, acting on aci…	biological regulation;biosynthetic process;cellular component assembly;cellular component organization;cellular metabolic process;cellular nitrogen compound metabolic process;cellular process;chromatin modification;chromatin organization;chromosome organization;cytoskeleton organization;DNA geometric change;DNA metabolic process;macromolecule metabolic process;metabolic process;nitrogen compound …	cell part;centrosome;chromatin remodeling complex;cytoplasm;intracellular membrane-bounded organelle;intracellular non-membrane-bounded organelle;intracellular organelle;macromolecular complex;membrane;microtubule organizing center;nucleoplasm;nucleus;organelle;protein complex;transcriptional repressor complex	3D-structure;Acetylation;Alternativesplicing;ATP-binding;Chromatinregulator;Completeproteome;Cytoplasm;Cytoskeleton;DNA-binding;Helicase;Hydrolase;Metal-binding;Nucleotide-binding;Nucleus;Phosphoprotein;Polymorphism;Referenceproteome;Repeat;Transcription;Transcriptionregulation;Zinc;Zinc-finger	39	3.29983	0.0106232	-1.35482	-1.19731	2.21591	0.0868996	-1.04816	-0.875127	0.720988	0.714516	0.306657	0.256711	0.558633	0.800876	-0.224259	-0.188462	0.150584	0.916813	-0.0709305	-0.0603333	3.63792	0.0995738	-1.20149	-1.02342	2.86958	0.00922734	-1.42575	-1.20914	>sp|Q14839|CHD4_HUMAN Chromodomain-helicase-DNA-binding protein 4 OS=Homo sapiens GN=CHD4 PE=1 SV=2	Q14839	Chromodomain-helicase-DNA-binding protein 4	CHD4_HUMAN	18.6347	18.656	18.357
CHMP3	+	+						+		alcohol binding;amine binding;binding;cation binding;identical protein binding;ion binding;lipid binding;phosphatidylcholine binding;phospholipid binding;protein binding;protein dimerization activity;protein homodimerization activity;quaternary ammonium group binding	biological regulation;cell cycle;cell death;cellular component assembly;cellular component organization;cellular macromolecular complex assembly;cellular process;death;endosome transport;establishment of localization;macromolecular complex assembly;membrane organization;protein complex assembly;protein polymerization;protein transport;regulation of cell cycle;regulation of organelle organization;…	cell part;cytoplasmic membrane-bounded vesicle;cytosol;extracellular organelle;intracellular membrane-bounded organelle;intracellular organelle;macromolecular complex;membrane;organelle;plasma membrane;protein complex;vesicle	3D-structure;Alternativesplicing;Apoptosis;Cellcycle;Celldivision;Coiledcoil;Completeproteome;Cytoplasm;Endosome;Isopeptidebond;Lipoprotein;Membrane;Myristate;Phosphoprotein;Proteintransport;Referenceproteome;Transport;Ublconjugation	2	1.65552	0.0220585	1.34884	0.983628	2.78983	0.0458374	1.23591	1.06269	0.12026	0.913832	-0.112932	-0.084123	2.34346	0.453285	-0.98405	-0.793832	1.36004	0.173499	-1.04052	-0.766505	2.90278	0.0970878	1.29238	1.03518	0.733795	0.561253	0.308327	0.258542	>sp|Q9Y3E7|CHMP3_HUMAN Charged multivesicular body protein 3 OS=Homo sapiens GN=CHMP3 PE=1 SV=3	Q9Y3E7	Charged multivesicular body protein 3	CHMP3_HUMAN	14.2796	14.082	14.6084
CHTF8	+	+						+	+			cell part;extracellular organelle;intracellular membrane-bounded organelle;intracellular organelle;nucleus;organelle;vesicle	Alternativesplicing;Completeproteome;Nucleus;Referenceproteome	2	3.90546	0.0163946	-1.16317	-1.07793	2.59829	0.0583855	-1.16258	-0.9916	0.00105317	1	0.000591914	0.000500228	0.840254	0.774822	-0.242627	-0.211401	0.743518	0.664402	-0.242331	-0.210802	4.53035	0.0973162	-1.16287	-1.03633	3.30519	0.00801752	-1.4055	-1.23719	>sp|P0CG12|CTF8A_HUMAN Chromosome transmission fidelity protein 8 homolog isoform 2 OS=Homo sapiens GN=CHTF8 PE=1 SV=1	P0CG12	Chromosome transmission fidelity protein 8 homolog isoform 2	CTF8A_HUMAN	16.4656	16.5496	16.4337
CIAPIN1	+	+						+	+	2 iron, 2 sulfur cluster binding;binding;cation binding;electron carrier activity;ion binding;iron-sulfur cluster binding;metal cluster binding;metal ion binding	anatomical structure development;biological regulation;biosynthetic process;cell death;cellular metabolic process;cellular process;cofactor metabolic process;death;developmental process;metabolic process;small molecule metabolic process	cell part;cytoplasm;intracellular non-membrane-bounded organelle;intracellular organelle;nucleolus;nucleoplasm;organelle	2Fe-2S;3D-structure;Alternativesplicing;Apoptosis;Completeproteome;Cytoplasm;Iron;Iron-sulfur;Metal-binding;Mitochondrion;Nucleus;Phosphoprotein;Polymorphism;Referenceproteome	13	3.48192	0.0113076	-1.29503	-1.16365	3.16696	0.0200182	-1.61808	-1.38293	0.953992	0.691549	-0.323051	-0.278852	1.50169	0.661222	-0.426328	-0.367833	2.21745	0.313204	-0.587853	-0.529224	4.4083	0.0537934	-1.45655	-1.25602	3.92245	0.00371429	-1.88288	-1.67108	>sp|Q6FI81|CPIN1_HUMAN Anamorsin OS=Homo sapiens GN=CIAPIN1 PE=1 SV=2	Q6FI81	Anamorsin	CPIN1_HUMAN	16.5301	16.3226	16.6316
CISD1	+	+						+	+	2 iron, 2 sulfur cluster binding;binding;cation binding;ion binding;iron-sulfur cluster binding;metal cluster binding;metal ion binding	biological regulation	cell part;extracellular organelle;intracellular membrane-bounded organelle;intracellular organelle;membrane;mitochondrion;organelle;vesicle	2Fe-2S;3D-structure;Acetylation;Completeproteome;Iron;Iron-sulfur;Isopeptidebond;Membrane;Metal-binding;Mitochondrion;Mitochondrionoutermembrane;Referenceproteome;Signal-anchor;Transmembrane;Transmembranehelix;Ublconjugation	2	2.62517	0.00279208	-2.18758	-1.65838	1.64529	0.0397765	-1.58482	-1.10098	0.681118	0.528463	0.602758	0.429846	1.82329	0.434904	-1.10583	-0.821969	1.50756	0.233602	-0.80445	-0.645235	2.85381	0.0393591	-1.8862	-1.37692	3.22552	0.00266667	-2.99203	-2.29514	>sp|Q9NZ45|CISD1_HUMAN CDGSH iron-sulfur domain-containing protein 1 OS=Homo sapiens GN=CISD1 PE=1 SV=1	Q9NZ45	CDGSH iron-sulfur domain-containing protein 1	CISD1_HUMAN	12.7746	12.9687	13.6272
CKAP4	+	+						+	+			cell part;cytoskeleton;endoplasmic reticulum;extracellular organelle;intracellular membrane-bounded organelle;intracellular non-membrane-bounded organelle;intracellular organelle;lipid particle;membrane;organelle;plasma membrane;vesicle	Acetylation;Cellmembrane;Coiledcoil;Completeproteome;Cytoplasm;Cytoskeleton;Directproteinsequencing;Endoplasmicreticulum;Lipoprotein;Membrane;Palmitate;Phosphoprotein;Polymorphism;Referenceproteome;Signal-anchor;Transmembrane;Transmembranehelix	33	6.00897	0.00204959	2.58923	2.46105	1.69514	0.0254673	1.91906	1.26791	0.579156	0.518472	-0.670166	-0.442172	0.666452	0.634422	-0.576206	-0.404864	1.94452	0.178444	-0.911289	-0.756007	3.08706	0.032	2.25415	1.60697	2.95557	0.00672065	1.67794	1.3981	>sp|Q07065|CKAP4_HUMAN Cytoskeleton-associated protein 4 OS=Homo sapiens GN=CKAP4 PE=1 SV=2	Q07065	Cytoskeleton-associated protein 4	CKAP4_HUMAN	22.532	22.5914	22.5616
CKB	+	+				+		+	+	adenyl nucleotide binding;adenyl ribonucleotide binding;ATP binding;binding;catalytic activity;creatine kinase activity;enzyme binding;kinase activity;nucleotide binding;phosphotransferase activity, nitrogenous group as acceptor;protein binding;purine nucleotide binding;purine ribonucleoside triphosphate binding;purine ribonucleotide binding;ribonucleotide binding;transferase activity;transferase…	amine metabolic process;anatomical structure development;biological regulation;cellular amino acid metabolic process;cellular homeostasis;cellular ion homeostasis;cellular ketone metabolic process;cellular metabolic process;cellular nitrogen compound metabolic process;cellular process;developmental process;homeostatic process;metabolic process;nitrogen compound metabolic process;organic acid meta…	cell part;cytosol;extracellular organelle;intracellular membrane-bounded organelle;intracellular organelle;mitochondrion;organelle;vesicle	3D-structure;ATP-binding;Completeproteome;Cytoplasm;Directproteinsequencing;Kinase;Nitration;Nucleotide-binding;Phosphoprotein;Polymorphism;Referenceproteome;Transferase	22	2.7362	0.00480792	-1.91757	-1.5203	4.20662	0.0082963	-2.24882	-1.99317	0.50829	0.713469	-0.331257	-0.257717	4.65757	0.166	-2.21523	-1.8121	3.03572	0.02104	-2.38086	-1.87374	4.54488	0.0295385	-2.0832	-1.71086	5.9209	0	-4.29843	-3.94003	>sp|P12277|KCRB_HUMAN Creatine kinase B-type OS=Homo sapiens GN=CKB PE=1 SV=1	P12277	Creatine kinase B-type	KCRB_HUMAN	20.3083	20.1749	20.2024
CKMT1A	+	+				+		+		adenyl nucleotide binding;adenyl ribonucleotide binding;ATP binding;binding;catalytic activity;creatine kinase activity;kinase activity;nucleotide binding;phosphotransferase activity, nitrogenous group as acceptor;purine nucleotide binding;purine ribonucleoside triphosphate binding;purine ribonucleotide binding;ribonucleotide binding;transferase activity;transferase activity, transferring phospho…	amine metabolic process;cellular amino acid metabolic process;cellular ketone metabolic process;cellular metabolic process;cellular nitrogen compound metabolic process;cellular process;metabolic process;nitrogen compound metabolic process;organic acid metabolic process;primary metabolic process;small molecule metabolic process	cell part;extracellular organelle;intracellular membrane-bounded organelle;intracellular organelle;membrane;mitochondrion;organelle;vesicle	3D-structure;Alternativesplicing;ATP-binding;Completeproteome;Kinase;Membrane;Mitochondrion;Mitochondrioninnermembrane;Nucleotide-binding;Referenceproteome;Transferase;Transitpeptide	14	2.75375	0.00743051	-1.7804	-1.43577	3.15857	0.0166392	-1.73169	-1.46395	0.0987395	0.963558	0.048701	0.0413833	4.25354	0.195294	1.85646	1.52797	2.36815	0.0310526	1.88081	1.42268	4.88935	0.0340328	-1.75605	-1.51033	0.111806	0.887411	0.100417	0.0757645	>sp|P12532|KCRU_HUMAN Creatine kinase U-type, mitochondrial OS=Homo sapiens GN=CKMT1A PE=1 SV=1	P12532	Creatine kinase U-type, mitochondrial	KCRU_HUMAN	16.7906	17.3735	16.9628
CLDN6	+	+		+	iPSC_NSC	+		+		binding;identical protein binding;protein binding;structural molecule activity	biological adhesion;cell adhesion;cell junction organization;cellular component organization;cellular process;viral reproduction	cell part;membrane;plasma membrane	Celljunction;Cellmembrane;Completeproteome;Host-virusinteraction;Membrane;Phosphoprotein;Polymorphism;Referenceproteome;Tightjunction;Transmembrane;Transmembranehelix	2	2.56888	0.00217544	-4.01668	-2.50003	3.22726	0.0122759	-5.34458	-3.4664	1.11095	0.185031	-1.3279	-0.85008	3.42473	0.0704	4.23657	2.54518	2.19121	0.0348333	3.57262	2.12057	3.83134	0.052381	-4.68063	-2.86946	0.265452	0.548674	-0.444064	-0.266192	>sp|P56747|CLD6_HUMAN Claudin-6 OS=Homo sapiens GN=CLDN6 PE=1 SV=2	P56747	Claudin-6	CLD6_HUMAN	12.7279	11.9755	11.2883
CLIC1	+	+						+	+	anion channel activity;anion transmembrane transporter activity;channel activity;chloride channel activity;gated channel activity;ion channel activity;ion transmembrane transporter activity;passive transmembrane transporter activity;substrate-specific channel activity;substrate-specific transmembrane transporter activity;substrate-specific transporter activity;transmembrane transporter activity;t…	biological adhesion;biological regulation;cell adhesion;cellular homeostasis;cellular ion homeostasis;cellular process;establishment of localization;homeostatic process;ion transport;regulation of cell cycle;response to stimulus;signal transduction;transport	brush border;cell part;cell projection;cytoplasm;extracellular organelle;extracellular space;intracellular membrane-bounded organelle;intracellular organelle;macromolecular complex;membrane;mitochondrion;nuclear envelope;nucleus;organelle;plasma membrane;protein complex;vesicle	3D-structure;Acetylation;Cellmembrane;Chloride;Chloridechannel;Completeproteome;Cytoplasm;Directproteinsequencing;Disulfidebond;Glutathionylation;Ionchannel;Iontransport;Membrane;Nucleus;Phosphoprotein;Referenceproteome;Transmembrane;Transmembranehelix;Transport;Voltage-gatedchannel	11	4.01765	0.00278167	1.90853	1.70173	3.48664	0.0257723	1.41253	1.25805	1.48592	0.527264	-0.496	-0.429573	0.894328	0.69351	0.383787	0.314052	0.266633	0.832312	0.135787	0.112822	4.21974	0.039284	1.66053	1.39	3.45993	0.00325926	2.04432	1.73167	>sp|O00299|CLIC1_HUMAN Chloride intracellular channel protein 1 OS=Homo sapiens GN=CLIC1 PE=1 SV=4	O00299	Chloride intracellular channel protein 1	CLIC1_HUMAN	22.7145	22.7687	22.5851
CLNS1A	+	+						+	+	binding;protein binding;protein dimerization activity;protein heterodimerization activity	biological regulation;cellular component assembly;cellular component organization;cellular homeostasis;cellular macromolecular complex assembly;cellular metabolic process;cellular nitrogen compound metabolic process;cellular process;establishment of localization;homeostatic process;ion transport;macromolecular complex assembly;macromolecule metabolic process;metabolic process;nitrogen compound me…	cell part;cytoplasm;cytoskeleton;cytosol;intracellular membrane-bounded organelle;intracellular non-membrane-bounded organelle;intracellular organelle;macromolecular complex;membrane;nucleoplasm;nucleus;organelle;plasma membrane;protein complex	Acetylation;Completeproteome;Cytoplasm;Cytoskeleton;Directproteinsequencing;Nucleus;Phosphoprotein;Polymorphism;Referenceproteome	5	2.6733	0.0105761	-1.44848	-1.20193	2.39588	0.0293211	-1.51782	-1.20907	0.14816	0.945144	-0.0693423	-0.0590538	0.477685	0.851121	0.168068	0.144687	0.298098	0.832374	0.133397	0.112893	4.22941	0.0528038	-1.48315	-1.26416	2.14045	0.0198049	-1.31509	-1.04333	>sp|P54105|ICLN_HUMAN Methylosome subunit pICln OS=Homo sapiens GN=CLNS1A PE=1 SV=1	P54105	Methylosome subunit pICln	ICLN_HUMAN	15.4909	15.6015	16.1268
CLTB	+	+						+	+	binding;clathrin binding;clathrin heavy chain binding;peptide binding;protein binding;structural molecule activity	cellular component organization;cellular membrane organization;cellular process;endocytosis;establishment of localization;membrane invagination;membrane organization;protein transport;transport;vesicle-mediated transport	cell part;cytoplasm;intracellular membrane-bounded organelle;intracellular organelle;macromolecular complex;membrane;organelle;plasma membrane;protein complex	Acetylation;Alternativesplicing;Calcium;Coatedpit;Completeproteome;Cytoplasmicvesicle;Disulfidebond;Membrane;Phosphoprotein;Referenceproteome	7	2.67219	0.00245638	2.50148	1.84679	2.21709	0.016007	2.03984	1.47334	0.432513	0.649447	-0.461638	-0.316882	0.529361	0.697997	-0.420494	-0.306484	0.76318	0.359161	-0.651313	-0.467675	3.43203	0.0298293	2.27066	1.67553	2.4256	0.00623899	1.85017	1.41718	>sp|P09497|CLCB_HUMAN Clathrin light chain B OS=Homo sapiens GN=CLTB PE=1 SV=1	P09497	Clathrin light chain B	CLCB_HUMAN	18.1182	17.6904	17.5113
CMPK1	+	+						+	+	adenyl nucleotide binding;adenyl ribonucleotide binding;ATP binding;binding;catalytic activity;cytidylate kinase activity;kinase activity;nucleobase-containing compound kinase activity;nucleoside diphosphate kinase activity;nucleoside kinase activity;nucleotide binding;nucleotide kinase activity;phosphotransferase activity, phosphate group as acceptor;purine nucleotide binding;purine ribonucleosi…	biosynthetic process;cellular aromatic compound metabolic process;cellular ketone metabolic process;cellular metabolic process;cellular nitrogen compound metabolic process;cellular process;heterocycle metabolic process;metabolic process;nitrogen compound metabolic process;nucleobase-containing compound metabolic process;nucleobase-containing small molecule interconversion;nucleobase-containing sm…	cell part;cytoplasm;cytosol;extracellular organelle;intracellular membrane-bounded organelle;intracellular non-membrane-bounded organelle;intracellular organelle;nucleolus;nucleoplasm;nucleus;organelle;vesicle	3D-structure;Acetylation;Alternativesplicing;ATP-binding;Completeproteome;Cytoplasm;Directproteinsequencing;Kinase;Nucleotide-binding;Nucleus;Phosphoprotein;Pyrimidinebiosynthesis;Referenceproteome;Transferase	10	3.10602	0.0089247	1.52282	1.30606	2.20564	0.0366376	1.43146	1.12552	0.115838	0.930251	-0.0913607	-0.0710071	1.44784	0.611898	-0.548141	-0.452564	1.42292	0.333564	-0.593821	-0.497237	3.81227	0.0574382	1.47714	1.23035	2.24857	0.060156	0.929	0.792924	>sp|P30085|KCY_HUMAN UMP-CMP kinase OS=Homo sapiens GN=CMPK1 PE=1 SV=3	P30085	UMP-CMP kinase	KCY_HUMAN	19.464	19.3906	19.1398
CNOT7	+	+						+	+	3'-5' exonuclease activity;3'-5'-exoribonuclease activity;binding;catalytic activity;cation binding;exonuclease activity;exonuclease activity, active with either ribo- or deoxyribonucleic acids and producing 5'-phosphomonoesters;exoribonuclease activity;exoribonuclease activity, producing 5'-phosphomonoesters;hydrolase activity;hydrolase activity, acting on ester bonds;ion binding;metal ion bindi…	biological regulation;biosynthetic process;carbohydrate metabolic process;catabolic process;cellular component assembly;cellular component organization;cellular macromolecular complex assembly;cellular metabolic process;cellular nitrogen compound metabolic process;cellular process;gene silencing;macromolecular complex assembly;macromolecule metabolic process;metabolic process;mRNA metabolic proce…	cell part;cytosol;intracellular membrane-bounded organelle;intracellular non-membrane-bounded organelle;intracellular organelle;macromolecular complex;membrane;nucleus;organelle;protein complex;ribonucleoprotein complex;transcription factor complex	3D-structure;Alternativesplicing;Completeproteome;Cytoplasm;Exonuclease;Hydrolase;Magnesium;Metal-binding;Nuclease;Nucleus;Referenceproteome;Repressor;RNA-binding;RNA-mediatedgenesilencing;Transcription;Transcriptionregulation;Translationregulation	5	2.52608	0.00508609	-2.08034	-1.57286	3.41642	0.0125167	-1.92452	-1.63874	0.16332	0.881393	0.155823	0.114668	0.620359	0.715207	0.356603	0.279137	0.496112	0.528088	0.434515	0.314365	4.12305	0.032	-2.00243	-1.61102	2.78011	0.00693333	-1.64583	-1.35087	>sp|Q9UIV1|CNOT7_HUMAN CCR4-NOT transcription complex subunit 7 OS=Homo sapiens GN=CNOT7 PE=1 SV=3	Q9UIV1	CCR4-NOT transcription complex subunit 7	CNOT7_HUMAN	17.3483	17.2742	17.1644
COA3	+	+						+	+		biological regulation;cellular component assembly;cellular component organization;cellular macromolecular complex assembly;cellular process;macromolecular complex assembly;protein complex assembly;protein complex biogenesis;regulation of organelle organization;regulation of translation	cell part;intracellular membrane-bounded organelle;intracellular organelle;mitochondrion;organelle	Acetylation;Coiledcoil;Completeproteome;Directproteinsequencing;Membrane;Mitochondrion;Mitochondrioninnermembrane;Referenceproteome;Transmembrane;Transmembranehelix	2	3.3711	0.00181022	3.03552	2.36679	1.11606	0.0730149	1.52456	0.928255	1.03024	0.162468	-1.51096	-0.894759	0.146061	0.840135	0.257812	0.153789	0.748382	0.440244	-0.497667	-0.381247	1.93687	0.0400692	2.28004	1.36354	3.85348	0.00220952	2.53785	2.15462	>sp|Q9Y2R0|COA3_HUMAN Cytochrome c oxidase assembly factor 3 homolog, mitochondrial OS=Homo sapiens GN=COA3 PE=1 SV=1	Q9Y2R0	Cytochrome c oxidase assembly factor 3 homolog, mitochondrial	COA3_HUMAN	16.222	16.2022	15.9263
COA7	+	+						+	+			cell part	Acetylation;Completeproteome;Mitochondrion;Polymorphism;Referenceproteome;Repeat	3	1.33785	0.0202488	-1.55872	-1.00886	1.30952	0.0246954	-2.34322	-1.27474	0.504557	0.491625	-0.7845	-0.466941	0.0216903	0.978284	0.0329091	0.0216544	0.806839	0.545287	-0.359341	-0.297965	1.80267	0.0610987	-1.95097	-1.20741	1.6463	0.0083465	-1.91806	-1.25242	>sp|Q96BR5|COA7_HUMAN Cytochrome c oxidase assembly factor 7 OS=Homo sapiens GN=COA7 PE=1 SV=2	Q96BR5	Cytochrome c oxidase assembly factor 7	COA7_HUMAN	13.9516	12.1633	12.9218
COG4	+	+						+			cellular component assembly;cellular component organization;cellular macromolecular complex assembly;cellular process;establishment of localization;Golgi organization;Golgi vesicle transport;macromolecular complex assembly;organelle organization;protein complex assembly;protein transport;transport;vesicle-mediated transport	cell part;macromolecular complex;membrane;protein complex	3D-structure;Acetylation;Alternativesplicing;Completeproteome;Congenitaldisorderofglycosylation;Diseasemutation;Golgiapparatus;Membrane;Polymorphism;Proteintransport;Referenceproteome;Transport	2	4.5589	0.0137065	-1.18525	-1.12336	3.43149	0.0204052	-1.54514	-1.35684	1.26919	0.648868	-0.359885	-0.317629	0.0100587	0.98763	0.0231121	0.0130051	0.0459912	0.896871	-0.15683	-0.0723998	4.40502	0.0647737	-1.36519	-1.18731	0.502859	0.116543	-1.34208	-0.619373	>sp|Q9H9E3|COG4_HUMAN Conserved oligomeric Golgi complex subunit 4 OS=Homo sapiens GN=COG4 PE=1 SV=3	Q9H9E3	Conserved oligomeric Golgi complex subunit 4	COG4_HUMAN	14.5534	14.4398	14.3917
COL1A1	+	+						+	+	binding;cation binding;extracellular matrix structural constituent;growth factor binding;identical protein binding;ion binding;metal ion binding;platelet-derived growth factor binding;protein binding;structural molecule activity	anatomical structure development;anatomical structure formation involved in morphogenesis;anatomical structure morphogenesis;biological regulation;biosynthetic process;cell activation;cell communication;cell differentiation;cell motility;cellular component assembly;cellular component disassembly;cellular component movement;cellular component organization;cellular localization;cellular membrane or…	cell part;cytoplasmic membrane-bounded vesicle;extracellular matrix;extracellular region;extracellular space;Golgi apparatus;intracellular membrane-bounded organelle;intracellular organelle;organelle;vesicle	3D-structure;Calcium;Chromosomalrearrangement;Collagen;Completeproteome;Directproteinsequencing;Diseasemutation;Disulfidebond;Dwarfism;Ehlers-Danlossyndrome;Extracellularmatrix;Glycoprotein;Hydroxylation;Metal-binding;Osteogenesisimperfecta;Polymorphism;Pyrrolidonecarboxylicacid;Referenceproteome;Repeat;Secreted;Signal	61	2.3888	0.00258333	3.32275	2.12787	1.74967	0.0168125	2.35731	1.46682	0.516359	0.428335	-0.965439	-0.530338	0.105012	0.88611	0.188919	0.113323	0.166572	0.721498	-0.2938	-0.176462	2.5759	0.0289444	2.84003	1.74769	2.91193	0.00244211	3.02895	2.20936	>sp|P02452|CO1A1_HUMAN Collagen alpha-1(I) chain OS=Homo sapiens GN=COL1A1 PE=1 SV=5	P02452	Collagen alpha-1(I) chain	CO1A1_HUMAN	24.6793	24.514	24.4293
COL1A2	+	+						+	+	binding;binding, bridging;cation binding;extracellular matrix structural constituent;growth factor binding;identical protein binding;ion binding;metal ion binding;platelet-derived growth factor binding;protein binding;protein binding, bridging;structural molecule activity	anatomical structure development;anatomical structure morphogenesis;biological regulation;cell activation;cell motility;cellular component assembly;cellular component disassembly;cellular component movement;cellular component organization;cellular membrane organization;cellular process;coagulation;developmental process;endocytosis;establishment of localization;extracellular matrix organization;ex…	cell part;extracellular matrix;extracellular organelle;extracellular region;extracellular space;organelle;vesicle	Calcium;Chromosomalrearrangement;Collagen;Completeproteome;Directproteinsequencing;Diseasemutation;Disulfidebond;Dwarfism;Ehlers-Danlossyndrome;Extracellularmatrix;Glycoprotein;Hydroxylation;Metal-binding;Osteogenesisimperfecta;Polymorphism;Referenceproteome;Repeat;Secreted;Signal	60	2.19449	0.00276226	3.04362	1.92376	1.4805	0.0397545	1.67719	1.09978	0.821451	0.241211	-1.36642	-0.771756	0.46571	0.62577	0.708887	0.418025	0.0134646	0.978714	0.0256755	0.0157463	1.99103	0.0379487	2.36041	1.40713	3.3928	0.00158824	3.06929	2.39406	>sp|P08123|CO1A2_HUMAN Collagen alpha-2(I) chain OS=Homo sapiens GN=COL1A2 PE=1 SV=7	P08123	Collagen alpha-2(I) chain	CO1A2_HUMAN	23.5649	23.3627	23.213
COL3A1	+	+	+			+		+		binding;cation binding;extracellular matrix structural constituent;growth factor binding;integrin binding;ion binding;metal ion binding;platelet-derived growth factor binding;protein binding;protein complex binding;receptor binding;structural molecule activity	aging;anatomical structure development;anatomical structure morphogenesis;biological adhesion;biological regulation;cell activation;cell adhesion;cellular component disassembly;cellular component organization;cellular membrane organization;cellular metabolic process;cellular process;developmental process;endocytosis;establishment of localization;extracellular matrix organization;extracellular str…	cell part;extracellular matrix;extracellular region;extracellular space	3D-structure;Alternativesplicing;Aorticaneurysm;Calcium;Collagen;Completeproteome;Directproteinsequencing;Diseasemutation;Disulfidebond;Ehlers-Danlossyndrome;Extracellularmatrix;Glycoprotein;Hydroxylation;Metal-binding;Polymorphism;Referenceproteome;Repeat;Secreted;Signal	50	4.8206	0.00486275	3.41716	3.00675	1.54356	0.0642462	1.36064	0.967511	2.08255	0.0376769	-2.05653	-1.4452	1.05736	0.353514	-2.00673	-0.99772	1.31597	0.0296	-3.035	-1.45912	1.86934	0.0390631	2.3889	1.38199	0.130861	0.703649	0.382168	0.184303	>sp|P02461|CO3A1_HUMAN Collagen alpha-1(III) chain OS=Homo sapiens GN=COL3A1 PE=1 SV=4	P02461	Collagen alpha-1(III) chain	CO3A1_HUMAN	21.9813	21.9281	21.8151
COL4A2	+	+	+					+	+	extracellular matrix structural constituent;structural molecule activity	anatomical structure formation involved in morphogenesis;biological regulation;biosynthetic process;cell differentiation;cellular component disassembly;cellular component organization;cellular membrane organization;cellular metabolic process;cellular nitrogen compound metabolic process;cellular process;developmental process;endocytosis;establishment of localization;extracellular matrix organizati…	cell part;extracellular matrix;extracellular organelle;extracellular region;intracellular membrane-bounded organelle;intracellular organelle;organelle;vesicle	3D-structure;Angiogenesis;Basementmembrane;Collagen;Completeproteome;Directproteinsequencing;Diseasemutation;Disulfidebond;Extracellularmatrix;Glycoprotein;Hydroxylation;Polymorphism;Referenceproteome;Repeat;Secreted;Signal	2	1.27569	0.0205674	1.59173	1.00408	2.46725	0.00570149	4.04226	2.44936	1.34597	0.0515908	2.45053	1.32365	0.411044	0.593069	-1.00952	-0.48138	0.080034	0.836798	0.21574	0.110566	1.62055	0.0378206	2.817	1.42187	1.09442	0.0235943	1.80747	1.01742	>sp|P08572|CO4A2_HUMAN Collagen alpha-2(IV) chain OS=Homo sapiens GN=COL4A2 PE=1 SV=4	P08572	Collagen alpha-2(IV) chain	CO4A2_HUMAN	14.8345	14.6182	15.1111
COL6A2	+		+					+	+		biological adhesion;cell adhesion;cellular component assembly;cellular component disassembly;cellular component organization;cellular process;extracellular matrix organization;extracellular structure organization;locomotion;macromolecular complex assembly;macromolecule metabolic process;metabolic process;multicellular organismal process;protein complex assembly;response to chemical stimulus;respo…	cell part;extracellular matrix;extracellular organelle;extracellular region;extracellular space;macromolecular complex;membrane;organelle;plasma membrane;protein complex;proteinaceous extracellular matrix;vesicle	Alternativesplicing;Celladhesion;Collagen;Completeproteome;Directproteinsequencing;Diseasemutation;Extracellularmatrix;Glycoprotein;Hydroxylation;Membrane;Phosphoprotein;Polymorphism;Referenceproteome;Repeat;Secreted;Signal	28	4.27153	0.00186466	2.74268	2.38363	0.602218	0.265073	0.897083	0.538103	1.27505	0.0901519	-1.8456	-1.09925	0.0473117	0.933622	-0.117551	-0.0627302	0.675783	0.25422	-1.04035	-0.612275	1.33851	0.0974356	1.81988	1.03935	1.16406	0.0238746	1.70233	1.00869	>sp|P12110|CO6A2_HUMAN Collagen alpha-2(VI) chain OS=Homo sapiens GN=COL6A2 PE=1 SV=4	P12110	Collagen alpha-2(VI) chain	CO6A2_HUMAN	21.2733	21.1668	21.0721
COMMD3	+	+				+		+	+		biological regulation;biosynthetic process;cellular metabolic process;cellular nitrogen compound metabolic process;cellular process;establishment of localization;ion transport;macromolecule metabolic process;metabolic process;nitrogen compound metabolic process;nucleobase-containing compound metabolic process;primary metabolic process;RNA metabolic process;transport	cell part;cytoplasm;intracellular membrane-bounded organelle;intracellular organelle;nucleus;organelle	Completeproteome;Cytoplasm;Iontransport;Nucleus;Polymorphism;Referenceproteome;Sodium;Sodiumtransport;Transcription;Transcriptionregulation;Transport;Ublconjugationpathway	2	3.27656	0.00261053	2.7102	2.13938	1.5067	0.0136707	2.99872	1.5615	0.10936	0.843121	0.288519	0.147658	1.36511	0.372737	-1.56155	-0.955978	2.20504	0.0590973	-1.4173	-1.11665	2.55791	0.0291469	2.85446	1.74796	3.72164	0.010723	1.29291	1.17763	>sp|Q9UBI1|COMD3_HUMAN COMM domain-containing protein 3 OS=Homo sapiens GN=COMMD3 PE=1 SV=1	Q9UBI1	COMM domain-containing protein 3	COMD3_HUMAN	13.6265	13.8325	13.8034
CORO1C	+	+						+	+	actin binding;actin filament binding;binding;cytoskeletal protein binding;protein binding	biological regulation;cell motility;cellular component movement;cellular component organization;cellular membrane organization;cellular process;cytoskeleton organization;endocytosis;establishment of localization;locomotion;membrane invagination;membrane organization;organelle organization;regulation of protein modification process;response to stimulus;signal transduction;transport;vesicle-mediate…	cell part;cell projection;cytoplasm;cytoskeleton;intracellular non-membrane-bounded organelle;intracellular organelle;macromolecular complex;organelle;protein complex	Acetylation;Actin-binding;Alternativesplicing;Cellmembrane;Cellprojection;Coiledcoil;Completeproteome;Cytoplasm;Cytoskeleton;Membrane;Referenceproteome;Repeat;WDrepeat	20	3.87621	0.00481499	1.81263	1.61071	3.17762	0.0151232	1.77957	1.5007	0.052191	0.979415	-0.0330582	-0.0271432	2.20978	0.577151	-0.582966	-0.506566	1.88999	0.313206	-0.599496	-0.525789	5.28685	0.032891	1.7961	1.56848	3.91906	0.0125735	1.21313	1.12138	>sp|Q9ULV4|COR1C_HUMAN Coronin-1C OS=Homo sapiens GN=CORO1C PE=1 SV=1	Q9ULV4	Coronin-1C	COR1C_HUMAN	20.8986	20.8886	20.7825
CORO2A	+	+						+	+	actin binding;actin filament binding;binding;cytoskeletal protein binding;protein binding	biological regulation;cellular component organization;cellular process;cytoskeleton organization;organelle organization;response to stimulus;signal transduction	cell part;cytoskeleton;intracellular non-membrane-bounded organelle;intracellular organelle;macromolecular complex;organelle;protein complex;transcriptional repressor complex	Actin-binding;Coiledcoil;Completeproteome;Polymorphism;Referenceproteome;Repeat;WDrepeat	2	3.7392	0.00257746	2.18865	1.88027	1.88171	0.0151828	2.2987	1.49214	0.0695554	0.930143	0.110046	0.0708535	1.6033	0.439757	1.13319	0.810258	1.84582	0.112204	1.18821	0.923727	3.30932	0.0309714	2.24367	1.64041	3.6856	0	3.37687	2.67765	>sp|Q92828|COR2A_HUMAN Coronin-2A OS=Homo sapiens GN=CORO2A PE=2 SV=2	Q92828	Coronin-2A	COR2A_HUMAN	17.0703	16.7986	16.9944
COTL1	+	+				+		+		actin binding;binding;cytoskeletal protein binding;enzyme binding;protein binding	biosynthetic process;cellular alkene metabolic process;cellular ketone metabolic process;cellular lipid metabolic process;cellular metabolic process;cellular process;lipid metabolic process;metabolic process;multi-organism process;organic acid metabolic process;primary metabolic process;response to biotic stimulus;response to stimulus;response to stress;small molecule metabolic process	cell part;cytoplasm;cytoskeleton;extracellular organelle;intracellular non-membrane-bounded organelle;intracellular organelle;membrane;organelle;vesicle	3D-structure;Acetylation;Actin-binding;Chaperone;Completeproteome;Cytoplasm;Cytoskeleton;Directproteinsequencing;Membrane;Nucleus;Referenceproteome	10	4.07316	0.002	2.48272	2.15318	3.88507	0.0148938	1.68299	1.50834	1.88879	0.311596	-0.799723	-0.673647	3.10149	0.2771	-1.64966	-1.27578	3.59294	0.02175	-2.04952	-1.75569	3.74708	0.032087	2.08286	1.615	2.2503	0.322586	0.433193	0.401129	>sp|Q14019|COTL1_HUMAN Coactosin-like protein OS=Homo sapiens GN=COTL1 PE=1 SV=3	Q14019	Coactosin-like protein	COTL1_HUMAN	21.48	21.5798	21.5553
CPPED1	+	+						+	+	binding;catalytic activity;cation binding;hydrolase activity;hydrolase activity, acting on ester bonds;ion binding;metal ion binding;phosphatase activity;phosphoprotein phosphatase activity;phosphoric ester hydrolase activity		cell part;cytoplasm;extracellular organelle;organelle;vesicle	Alternativesplicing;Completeproteome;Cytoplasm;Hydrolase;Metal-binding;Polymorphism;Referenceproteome	6	2.92006	0.00255052	2.41775	1.86749	1.93976	0.0314886	1.60485	1.17755	0.832037	0.40124	-0.812902	-0.559442	0.436994	0.712997	0.404259	0.285109	0.0020903	0.997817	-0.00219218	-0.00163301	2.80697	0.0368904	2.0113	1.43459	3.49497	0.00473469	2.41556	1.99804	>sp|Q9BRF8|CPPED_HUMAN Serine/threonine-protein phosphatase CPPED1 OS=Homo sapiens GN=CPPED1 PE=1 SV=3	Q9BRF8	Serine/threonine-protein phosphatase CPPED1	CPPED_HUMAN	17.9241	17.8607	17.6546
CPSF4	+	+						+	+	binding;cation binding;ion binding;metal ion binding;transition metal ion binding;zinc ion binding	biological regulation;cellular metabolic process;cellular nitrogen compound metabolic process;cellular process;interspecies interaction between organisms;macromolecule metabolic process;metabolic process;mRNA metabolic process;mRNA processing;multi-organism process;nitrogen compound metabolic process;nucleobase-containing compound metabolic process;primary metabolic process;RNA metabolic process;…	cell part;macromolecular complex;mRNA cleavage factor complex;nucleoplasm;protein complex	3D-structure;Alternativesplicing;Completeproteome;Host-virusinteraction;Metal-binding;mRNAprocessing;Nucleus;Phosphoprotein;Referenceproteome;Repeat;RNA-binding;Zinc;Zinc-finger	3	2.44924	0.00811656	-1.77558	-1.3776	1.08582	0.0539289	-1.81592	-1.01661	0.0183281	0.984161	-0.0403404	-0.0232954	0.523891	0.593207	-0.834819	-0.47847	0.418042	0.369748	-0.854989	-0.456948	1.99253	0.0649571	-1.79575	-1.18529	1.34116	0.00654198	-2.63057	-1.37195	>sp|O95639|CPSF4_HUMAN Cleavage and polyadenylation specificity factor subunit 4 OS=Homo sapiens GN=CPSF4 PE=1 SV=1	O95639	Cleavage and polyadenylation specificity factor subunit 4	CPSF4_HUMAN	12.9596	13.8893	13.7408
CPSF6	+	+						+	+	binding;mRNA binding;nucleic acid binding;nucleotide binding;RNA binding	cellular component assembly;cellular component organization;cellular metabolic process;cellular nitrogen compound metabolic process;cellular process;macromolecular complex assembly;macromolecule metabolic process;metabolic process;mRNA metabolic process;mRNA processing;nitrogen compound metabolic process;nucleobase-containing compound metabolic process;primary metabolic process;protein complex as…	cell part;intracellular membrane-bounded organelle;intracellular organelle;macromolecular complex;membrane;mRNA cleavage factor complex;nucleoplasm;nucleus;organelle;protein complex;ribonucleoprotein complex	3D-structure;Alternativesplicing;Completeproteome;Directproteinsequencing;mRNAprocessing;Nucleus;Phosphoprotein;Referenceproteome;RNA-binding	12	4.36264	0.00878706	-1.41421	-1.31718	2.22094	0.0698327	-1.14366	-0.941248	0.599234	0.749908	0.270555	0.225073	1.07269	0.668175	-0.430513	-0.354514	0.602911	0.619182	-0.295235	-0.242128	3.93075	0.0839065	-1.27893	-1.09655	2.74754	0.00654832	-1.70945	-1.38829	>sp|Q16630|CPSF6_HUMAN Cleavage and polyadenylation specificity factor subunit 6 OS=Homo sapiens GN=CPSF6 PE=1 SV=2	Q16630	Cleavage and polyadenylation specificity factor subunit 6	CPSF6_HUMAN	18.4987	18.2741	18.2819
CPT1A	+							+	+	carnitine O-acyltransferase activity;carnitine O-palmitoyltransferase activity;catalytic activity;O-acyltransferase activity;O-palmitoyltransferase activity;palmitoyltransferase activity;transferase activity;transferase activity, transferring acyl groups;transferase activity, transferring acyl groups other than amino-acyl groups	alcohol metabolic process;amine metabolic process;amine transport;amino acid transport;behavior;biological regulation;carbohydrate metabolic process;catabolic process;cell differentiation;cellular amino acid metabolic process;cellular component assembly;cellular component organization;cellular ketone metabolic process;cellular lipid metabolic process;cellular metabolic process;cellular nitrogen c…	cell part;intracellular membrane-bounded organelle;intracellular organelle;membrane;mitochondrion;organelle	3D-structure;Acetylation;Acyltransferase;Alternativesplicing;Completeproteome;Diseasemutation;Fattyacidmetabolism;Lipidmetabolism;Membrane;Mitochondrion;Mitochondrionoutermembrane;Nitration;Phosphoprotein;Polymorphism;Referenceproteome;Transferase;Transmembrane;Transmembranehelix;Transport	3	1.84228	0.00477019	2.45959	1.54291	1.06477	0.107003	1.26227	0.810631	0.668777	0.320975	-1.19732	-0.660738	0.430495	0.652752	-0.634476	-0.381303	0.959877	0.173137	-1.23314	-0.769987	1.5856	0.0775804	1.86093	1.12029	3.39158	0.0152538	1.22646	1.10215	>sp|P50416|CPT1A_HUMAN Carnitine O-palmitoyltransferase 1, liver isoform OS=Homo sapiens GN=CPT1A PE=1 SV=2	P50416	Carnitine O-palmitoyltransferase 1, liver isoform	CPT1A_HUMAN	16.4429	16.4712	16.3268
CPT2	+	+						+		carnitine O-acyltransferase activity;carnitine O-palmitoyltransferase activity;catalytic activity;O-acyltransferase activity;O-palmitoyltransferase activity;palmitoyltransferase activity;transferase activity;transferase activity, transferring acyl groups;transferase activity, transferring acyl groups other than amino-acyl groups	amine transport;amino acid transport;catabolic process;cellular ketone metabolic process;cellular lipid metabolic process;cellular metabolic process;cellular process;establishment of localization;ion transport;lipid metabolic process;lipid transport;metabolic process;organic acid metabolic process;organic acid transport;primary metabolic process;small molecule metabolic process;transmembrane tran…	cell part;intracellular membrane-bounded organelle;intracellular non-membrane-bounded organelle;intracellular organelle;membrane;mitochondrion;nucleolus;nucleoplasm;organelle	Acetylation;Acyltransferase;Completeproteome;Directproteinsequencing;Diseasemutation;Fattyacidmetabolism;Lipidmetabolism;Membrane;Mitochondrion;Mitochondrioninnermembrane;Polymorphism;Referenceproteome;Transferase;Transitpeptide;Transport	9	0.866495	0.0329239	1.65901	0.877461	0.824209	0.0956151	1.61082	0.845321	0.0953141	0.963961	-0.0481841	-0.0408089	1.48271	0.513481	-0.943002	-0.695556	0.874504	0.239444	-0.967094	-0.638427	1.54625	0.0987912	1.63491	1.02559	0.270031	0.415315	0.691912	0.341537	>sp|P23786|CPT2_HUMAN Carnitine O-palmitoyltransferase 2, mitochondrial OS=Homo sapiens GN=CPT2 PE=1 SV=2	P23786	Carnitine O-palmitoyltransferase 2, mitochondrial	CPT2_HUMAN	16.5343	18.4154	19.5866
CPVL	+	+						+	+	carboxypeptidase activity;catalytic activity;exopeptidase activity;hydrolase activity;peptidase activity;peptidase activity, acting on L-amino acid peptides;serine hydrolase activity;serine-type carboxypeptidase activity;serine-type exopeptidase activity;serine-type peptidase activity		extracellular organelle;organelle;vesicle	Carboxypeptidase;Completeproteome;Glycoprotein;Hydrolase;Polymorphism;Protease;Referenceproteome;Signal;Zymogen	8	3.23428	0.0023537	-2.24097	-1.82751	1.60673	0.0168995	-2.50023	-1.45967	0.135966	0.835885	-0.259261	-0.152182	0.443616	0.692679	0.464591	0.3151	0.866543	0.56274	0.33496	0.283907	2.76088	0.0320415	-2.3706	-1.59867	3.06288	0.00447458	-1.90601	-1.57111	>sp|Q9H3G5|CPVL_HUMAN Probable serine carboxypeptidase CPVL OS=Homo sapiens GN=CPVL PE=1 SV=2	Q9H3G5	Probable serine carboxypeptidase CPVL	CPVL_HUMAN	15.3295	14.8492	15.4303
CRABP2	+	+				+		+		binding;carboxylic acid binding;isoprenoid binding;lipid binding;monocarboxylic acid binding;retinal binding;retinoic acid binding;retinoid binding;retinol binding;transporter activity;vitamin binding	anatomical structure development;anatomical structure morphogenesis;biological regulation;biosynthetic process;cellular ketone metabolic process;cellular lipid metabolic process;cellular metabolic process;cellular process;developmental process;hormone metabolic process;lipid metabolic process;metabolic process;organic acid metabolic process;primary metabolic process;response to stimulus;signal tr…	cell part;cytoplasm;cytosol;endoplasmic reticulum;extracellular organelle;intracellular membrane-bounded organelle;intracellular organelle;nucleoplasm;organelle;vesicle	3D-structure;Completeproteome;Cytoplasm;Endoplasmicreticulum;Isopeptidebond;Nucleus;Referenceproteome;Retinol-binding;Transport;Ublconjugation;VitaminA	8	1.85132	0.0090134	1.8117	1.26257	1.52207	0.0203333	2.35156	1.37234	0.257475	0.676846	0.539857	0.294347	1.75636	0.323297	-1.7851	-1.13169	1.56914	0.0771206	-1.51517	-1.04927	2.07236	0.0437684	2.08163	1.32217	1.34744	0.544157	0.296525	0.26886	>sp|P29373|RABP2_HUMAN Cellular retinoic acid-binding protein 2 OS=Homo sapiens GN=CRABP2 PE=1 SV=2	P29373	Cellular retinoic acid-binding protein 2	RABP2_HUMAN	19.9458	20.0567	20.0507
CRMP1	+	+				+		+	+	catalytic activity;hydrolase activity;hydrolase activity, acting on carbon-nitrogen (but not peptide) bonds	anatomical structure development;cellular component organization;cellular metabolic process;cellular nitrogen compound metabolic process;cellular process;cytoskeleton organization;developmental process;locomotion;metabolic process;nitrogen compound metabolic process;nucleobase-containing compound metabolic process;organelle organization;primary metabolic process;response to chemical stimulus;resp…	cell body;cell part;cell projection;cytoplasm;cytosol;intracellular non-membrane-bounded organelle;intracellular organelle;microtubule organizing center;neuron projection;neuronal cell body;organelle	3D-structure;Alternativesplicing;Completeproteome;Cytoplasm;Cytoskeleton;Directproteinsequencing;Nitration;Phosphoprotein;Polymorphism;Referenceproteome	21	1.60498	0.0329263	-1.17409	-0.879349	1.67661	0.0486916	-1.46372	-1.04784	0.603503	0.735839	-0.289628	-0.23838	4.67434	0.201543	-1.78332	-1.5138	4.64171	0.0187541	-1.92814	-1.77639	2.68707	0.0973596	-1.31891	-1.03283	3.07521	0.00128571	-3.10223	-2.30754	>sp|Q14194|DPYL1_HUMAN Dihydropyrimidinase-related protein 1 OS=Homo sapiens GN=CRMP1 PE=1 SV=1	Q14194	Dihydropyrimidinase-related protein 1	DPYL1_HUMAN	18.4363	17.8887	17.2784
CRNKL1	+	+	+			+		+	+	binding;nucleic acid binding;RNA binding	biological regulation;cellular component assembly;cellular component organization;cellular macromolecular complex assembly;cellular metabolic process;cellular nitrogen compound metabolic process;cellular process;macromolecular complex assembly;macromolecule metabolic process;metabolic process;mRNA metabolic process;mRNA processing;nitrogen compound metabolic process;nucleobase-containing compound…	cell part;cytoplasm;macromolecular complex;ribonucleoprotein complex;spliceosomal complex	Acetylation;Alternativesplicing;Completeproteome;Cytoplasm;mRNAprocessing;mRNAsplicing;Nucleus;Polymorphism;Referenceproteome;Repeat;Spliceosome	5	2.53464	0.0892637	-0.684923	-0.619467	2.53804	0.00519231	-4.32974	-2.59802	2.27696	0.0123019	-3.64482	-2.19409	0.0485259	0.918049	-0.180301	-0.0781046	1.82853	0.0308613	-2.00271	-1.34559	1.05028	0.0822389	-2.50733	-1.10422	2.25143	0.00378947	-2.68764	-1.79706	>sp|Q9BZJ0|CRNL1_HUMAN Crooked neck-like protein 1 OS=Homo sapiens GN=CRNKL1 PE=1 SV=4	Q9BZJ0	Crooked neck-like protein 1	CRNL1_HUMAN	17.0965	17.0521	17.3585
CSNK1E	+	+						+	+	adenyl nucleotide binding;adenyl ribonucleotide binding;ATP binding;binding;catalytic activity;kinase activity;nucleotide binding;phosphotransferase activity, alcohol group as acceptor;protein kinase activity;protein serine/threonine kinase activity;purine nucleotide binding;purine ribonucleoside triphosphate binding;purine ribonucleotide binding;ribonucleotide binding;transferase activity;transf…	biological regulation;cell cycle;cellular component organization;cellular localization;cellular membrane organization;cellular metabolic process;cellular nitrogen compound metabolic process;cellular process;DNA metabolic process;DNA repair;endocytosis;establishment of localization;localization;macromolecule metabolic process;macromolecule modification;membrane invagination;membrane organization;m…	cell part;cytoplasm;cytosol;intracellular membrane-bounded organelle;intracellular organelle;macromolecular complex;nucleus;organelle;ribonucleoprotein complex	3D-structure;ATP-binding;Biologicalrhythms;Completeproteome;Cytoplasm;Kinase;Nucleotide-binding;Nucleus;Phosphoprotein;Polymorphism;Referenceproteome;Serine/threonine-proteinkinase;Transferase	2	2.33279	0.00796302	1.82045	1.38046	2.85863	0.00989091	2.35141	1.81237	0.632913	0.579922	0.530961	0.385302	0.117577	0.916406	0.106914	0.0797443	0.433074	0.575605	0.372395	0.2722	3.49466	0.0324752	2.08593	1.58184	2.81578	0.00306977	2.19285	1.70693	>sp|P49674|KC1E_HUMAN Casein kinase I isoform epsilon OS=Homo sapiens GN=CSNK1E PE=1 SV=1	P49674	Casein kinase I isoform epsilon	KC1E_HUMAN	15.9561	15.6552	15.4259
CSRP1	+	+						+	+	binding;cation binding;ion binding;metal ion binding;transition metal ion binding;zinc ion binding	biological adhesion;cell adhesion;cellular process	cell part;extracellular organelle;intracellular membrane-bounded organelle;intracellular organelle;nucleus;organelle;vesicle	Acetylation;Completeproteome;LIMdomain;Metal-binding;Nucleus;Phosphoprotein;Polymorphism;Referenceproteome;Repeat;Zinc	10	4.36665	0.00233962	2.93952	2.54998	2.20081	0.0151016	2.08213	1.49085	1.00852	0.362196	-0.857385	-0.612894	0.964241	0.570801	0.717544	0.516112	0.84669	0.609541	0.288851	0.249349	3.45531	0.027619	2.51083	1.80724	4.5308	0	3.22837	2.80112	>sp|P21291|CSRP1_HUMAN Cysteine and glycine-rich protein 1 OS=Homo sapiens GN=CSRP1 PE=1 SV=3	P21291	Cysteine and glycine-rich protein 1	CSRP1_HUMAN	20.8801	20.5776	20.561
CSRP2	+	+						+		binding;cation binding;ion binding;metal ion binding;transition metal ion binding;zinc ion binding	cell differentiation;cellular process;developmental process;multicellular organismal development;multicellular organismal process	cell part;intracellular membrane-bounded organelle;intracellular organelle;nucleus;organelle	Acetylation;Completeproteome;Developmentalprotein;Differentiation;LIMdomain;Metal-binding;Nucleus;Referenceproteome;Repeat;Zinc	10	2.38863	0.0167616	-1.30179	-1.06702	1.62606	0.0493139	-1.474	-1.04212	0.182399	0.866017	-0.172211	-0.126659	1.79395	0.525188	0.777564	0.623766	2.81173	0.242433	0.691459	0.634374	2.78933	0.0864441	-1.3879	-1.08479	1.27395	0.207417	-0.610331	-0.498338	>sp|Q16527|CSRP2_HUMAN Cysteine and glycine-rich protein 2 OS=Homo sapiens GN=CSRP2 PE=1 SV=3	Q16527	Cysteine and glycine-rich protein 2	CSRP2_HUMAN	17.9038	17.5755	17.1671
CSTB	+							+	+	binding;cysteine-type endopeptidase inhibitor activity;endopeptidase inhibitor activity;endopeptidase regulator activity;enzyme binding;enzyme inhibitor activity;enzyme regulator activity;peptidase inhibitor activity;peptidase regulator activity;protease binding;protein binding	behavior;biological regulation;multicellular organismal process;response to stimulus	cell part;cytoplasm;extracellular organelle;extracellular space;intracellular non-membrane-bounded organelle;intracellular organelle;nucleolus;organelle;vesicle	3D-structure;Acetylation;Completeproteome;Cytoplasm;Directproteinsequencing;Diseasemutation;Epilepsy;Nucleus;Proteaseinhibitor;Referenceproteome;Thiolproteaseinhibitor	4	2.37911	0.00599257	1.99951	1.49219	2.29264	0.112809	0.928941	0.796115	1.64212	0.201008	-1.07057	-0.825076	0.544734	0.681008	0.473026	0.335745	0.0676438	0.933342	-0.0622578	-0.0471211	2.01515	0.0973861	1.46422	1.03454	3.14599	0.00398738	1.93725	1.60615	>sp|P04080|CYTB_HUMAN Cystatin-B OS=Homo sapiens GN=CSTB PE=1 SV=2	P04080	Cystatin-B	CYTB_HUMAN	16.727	16.6622	16.2008
CTBP2	+	+						+	+	binding;catalytic activity;chromatin binding;coenzyme binding;cofactor binding;NAD binding;nucleotide binding;oxidoreductase activity;oxidoreductase activity, acting on CH-OH group of donors;oxidoreductase activity, acting on the CH-OH group of donors, NAD or NADP as acceptor;protein binding transcription factor activity;transcription coactivator activity;transcription cofactor activity;transcrip…	biological regulation;biosynthetic process;cell differentiation;cellular metabolic process;cellular nitrogen compound metabolic process;cellular process;developmental process;macromolecule metabolic process;metabolic process;nitrogen compound metabolic process;nucleobase-containing compound metabolic process;primary metabolic process;RNA metabolic process	cell part;intracellular membrane-bounded organelle;intracellular organelle;macromolecular complex;nucleus;organelle;protein complex;synapse;transcriptional repressor complex	3D-structure;Alternativesplicing;Celljunction;Completeproteome;Differentiation;Directproteinsequencing;NAD;Nucleus;Oxidoreductase;Phosphoprotein;Polymorphism;Referenceproteome;Repressor;Synapse;Transcription;Transcriptionregulation	11	4.35704	0.0118939	-1.22676	-1.15285	3.58223	0.0368284	-1.23862	-1.1242	0.0455125	0.991868	-0.0118586	-0.0108888	0.873945	0.752565	0.275167	0.236757	0.505592	0.650873	0.269238	0.218361	6.3546	0.0706717	-1.23269	-1.1527	1.79987	0.0654649	-0.957526	-0.773357	>sp|P56545|CTBP2_HUMAN C-terminal-binding protein 2 OS=Homo sapiens GN=CTBP2 PE=1 SV=1	P56545	C-terminal-binding protein 2	CTBP2_HUMAN	17.7632	17.7175	17.5735
CTDP1	+	+						+	+	catalytic activity;CTD phosphatase activity;DNA-directed RNA polymerase activity;hydrolase activity;hydrolase activity, acting on ester bonds;nucleotidyltransferase activity;phosphatase activity;phosphoprotein phosphatase activity;phosphoric ester hydrolase activity;protein serine/threonine phosphatase activity;RNA polymerase activity;transferase activity;transferase activity, transferring phosph…	biological regulation;biosynthetic process;cell division;cellular metabolic process;cellular nitrogen compound metabolic process;cellular process;macromolecule metabolic process;macromolecule modification;metabolic process;nitrogen compound metabolic process;nucleobase-containing compound metabolic process;phosphorus metabolic process;primary metabolic process;protein dephosphorylation;protein me…	cell part;centrosome;cytoplasm;cytoskeleton;intracellular non-membrane-bounded organelle;intracellular organelle;microtubule organizing center;midbody;nucleoplasm;organelle	3D-structure;Acetylation;Alternativesplicing;Cataract;Cellcycle;Celldivision;Completeproteome;Cytoplasm;Cytoskeleton;Hydrolase;Mitosis;Nucleus;Phosphoprotein;Polymorphism;Proteinphosphatase;Referenceproteome	3	2.84869	0.0125964	-1.33139	-1.1385	2.04267	0.0640365	-1.21656	-0.967922	0.200508	0.900276	0.114826	0.0940716	1.27712	0.67376	0.408035	0.347166	1.36292	0.421689	0.465448	0.401406	3.71559	0.088045	-1.27397	-1.08032	1.85896	0.0795213	-0.865937	-0.717547	>sp|Q9Y5B0|CTDP1_HUMAN RNA polymerase II subunit A C-terminal domain phosphatase OS=Homo sapiens GN=CTDP1 PE=1 SV=3	Q9Y5B0	RNA polymerase II subunit A C-terminal domain phosphatase	CTDP1_HUMAN	12.9403	12.7595	13.2771
CTDSPL2	+	+						+	+	catalytic activity;hydrolase activity;hydrolase activity, acting on ester bonds;phosphatase activity;phosphoprotein phosphatase activity;phosphoric ester hydrolase activity			Acetylation;Alternativesplicing;Completeproteome;Hydrolase;Phosphoprotein;Polymorphism;Proteinphosphatase;Referenceproteome	2	1.00743	0.00434043	-6.59616	-1.61982	0.711392	0.0309325	-4.90158	-1.1819	1.08576	0.130136	1.69457	0.977404	0.777553	0.514195	-1.14247	-0.656314	0.531604	0.625137	-0.295184	-0.237168	1.50731	0.0286441	-5.74887	-1.83244	1.05466	0.0034697	-6.89134	-1.69311	>sp|Q05D32|CTSL2_HUMAN CTD small phosphatase-like protein 2 OS=Homo sapiens GN=CTDSPL2 PE=1 SV=2	Q05D32	CTD small phosphatase-like protein 2	CTSL2_HUMAN	1	8.49586	11.2656
CTSA	+	+						+	+	carboxypeptidase activity;catalytic activity;enzyme activator activity;enzyme regulator activity;exopeptidase activity;hydrolase activity;peptidase activity;peptidase activity, acting on L-amino acid peptides;serine hydrolase activity;serine-type carboxypeptidase activity;serine-type exopeptidase activity;serine-type peptidase activity	biological regulation;biosynthetic process;carbohydrate metabolic process;cellular lipid metabolic process;cellular metabolic process;cellular process;establishment of localization;lipid metabolic process;macromolecule metabolic process;macromolecule modification;metabolic process;oligosaccharide metabolic process;peptidyl-amino acid modification;primary metabolic process;protein glycosylation;pr…	cell part;endoplasmic reticulum;extracellular organelle;intracellular membrane-bounded organelle;intracellular organelle;lysosome;membrane;nucleoplasm;organelle;vacuole;vesicle	3D-structure;Alternativesplicing;Carboxypeptidase;Completeproteome;Directproteinsequencing;Diseasemutation;Disulfidebond;Glycoprotein;Hydrolase;Lysosome;Protease;Referenceproteome;Signal;Zymogen	4	3.31702	0.003	2.43404	1.97258	2.49201	0.00995122	2.54625	1.81438	0.0855715	0.92434	0.11221	0.0765961	0.313849	0.801354	0.252463	0.188004	0.394688	0.632225	0.308568	0.231964	4.07831	0.028932	2.49015	1.9052	3.50567	0.00246809	2.74261	2.21936	>sp|P10619|PPGB_HUMAN Lysosomal protective protein OS=Homo sapiens GN=CTSA PE=1 SV=2	P10619	Lysosomal protective protein	PPGB_HUMAN	17.6269	17.5832	17.54
CTSB	+	+						+	+	binding;catalytic activity;collagen binding;cysteine-type endopeptidase activity;cysteine-type peptidase activity;endopeptidase activity;glycoprotein binding;hydrolase activity;peptidase activity;peptidase activity, acting on L-amino acid peptides;protein binding;proteoglycan binding	anatomical structure development;biological regulation;cell differentiation;cellular component disassembly;cellular component organization;cellular process;developmental process;extracellular matrix organization;extracellular structure organization;immune system process;macromolecule metabolic process;metabolic process;multicellular organismal process;primary metabolic process;protein metabolic p…	cell part;cytoplasmic membrane-bounded vesicle;extracellular organelle;extracellular region;extracellular space;intracellular;intracellular membrane-bounded organelle;intracellular non-membrane-bounded organelle;intracellular organelle;lysosome;mitochondrion;nucleolus;organelle;vacuole;vesicle	3D-structure;Acetylation;Completeproteome;Directproteinsequencing;Disulfidebond;Glycoprotein;Hydrolase;Lysosome;Polymorphism;Protease;Referenceproteome;Secreted;Signal;Thiolprotease;Zymogen	10	4.65703	0.00551111	3.51722	3.04666	1.64058	0.0225215	2.07052	1.31371	1.15382	0.153465	-1.4467	-0.910088	0.108989	0.886415	-0.18318	-0.112705	1.66695	0.193315	-0.90653	-0.726674	2.58552	0.0290738	2.79387	1.7328	3.59237	0.00216822	2.61069	2.15181	>sp|P07858|CATB_HUMAN Cathepsin B OS=Homo sapiens GN=CTSB PE=1 SV=3	P07858	Cathepsin B	CATB_HUMAN	21.0946	21.0048	20.8757
CTSC	+	+				+		+		anion binding;apoptotic protease activator activity;binding;caspase activator activity;caspase regulator activity;catalytic activity;chaperone binding;chloride ion binding;cysteine-type endopeptidase activity;cysteine-type peptidase activity;endopeptidase activity;enzyme activator activity;enzyme binding;enzyme regulator activity;hydrolase activity;ion binding;peptidase activator activity;peptida…	aging;biological regulation;cell killing;developmental process;immune system process;macromolecule metabolic process;metabolic process;primary metabolic process;protein metabolic process;proteolysis;proteolysis involved in cellular protein catabolic process;response to chemical stimulus;response to stimulus	cell part;endoplasmic reticulum;extracellular organelle;extracellular space;Golgi apparatus;intracellular membrane-bounded organelle;intracellular organelle;lysosome;membrane;organelle;vacuole;vesicle	3D-structure;Alternativesplicing;Chloride;Completeproteome;Directproteinsequencing;Diseasemutation;Disulfidebond;Glycoprotein;Hydrolase;Lysosome;Palmoplantarkeratoderma;Polymorphism;Protease;Referenceproteome;Signal;Thiolprotease;Zymogen	14	4.44868	0.00233866	-1.99143	-1.81257	2.5396	0.0150091	-1.95415	-1.50256	0.0421785	0.977451	0.0372817	0.0286528	4.77247	0.162778	2.17438	1.79733	4.15042	0.0274286	2.19302	1.94203	4.59437	0.0311494	-1.97279	-1.64051	0.721506	0.71554	0.201595	0.178747	>sp|P53634|CATC_HUMAN Dipeptidyl peptidase 1 OS=Homo sapiens GN=CTSC PE=1 SV=2	P53634	Dipeptidyl peptidase 1	CATC_HUMAN	18.1261	18.3209	18.3406
CTSZ	+	+						+	+	catalytic activity;cysteine-type endopeptidase activity;cysteine-type peptidase activity;endopeptidase activity;hydrolase activity;peptidase activity;peptidase activity, acting on L-amino acid peptides	anatomical structure morphogenesis;biological regulation;cellular metabolic process;cellular process;developmental process;hormone metabolic process;macromolecule metabolic process;metabolic process;multicellular organismal process;primary metabolic process;protein maturation;protein metabolic process;proteolysis;proteolysis involved in cellular protein catabolic process	cell part;endoplasmic reticulum;extracellular organelle;extracellular space;intracellular membrane-bounded organelle;intracellular organelle;lysosome;membrane;organelle;plasma membrane;vacuole;vesicle	3D-structure;Completeproteome;Disulfidebond;Glycoprotein;Hydrolase;Lysosome;Polymorphism;Protease;Referenceproteome;Signal;Thiolprotease;Zymogen	8	3.48622	0.00270175	2.06909	1.75358	1.14357	0.091691	1.3183	0.854853	0.612821	0.477842	-0.750787	-0.484417	0.156793	0.863943	0.199347	0.133686	0.1788	0.805226	-0.176046	-0.12811	2.19241	0.0668628	1.69369	1.17478	2.19169	0.0065873	1.89304	1.38917	>sp|Q9UBR2|CATZ_HUMAN Cathepsin Z OS=Homo sapiens GN=CTSZ PE=1 SV=1	Q9UBR2	Cathepsin Z	CATZ_HUMAN	19.0382	18.6782	18.756
CWC22	+	+						+	+	binding;nucleic acid binding;RNA binding	biological regulation;cellular metabolic process;cellular nitrogen compound metabolic process;cellular process;macromolecule metabolic process;metabolic process;mRNA metabolic process;mRNA processing;nitrogen compound metabolic process;nucleobase-containing compound metabolic process;primary metabolic process;RNA metabolic process;RNA processing;RNA splicing	cell part;cytoplasm;Golgi apparatus;intracellular membrane-bounded organelle;intracellular organelle;macromolecular complex;nucleoplasm;organelle;ribonucleoprotein complex;spliceosomal complex	3D-structure;Completeproteome;mRNAprocessing;mRNAsplicing;Nucleus;Phosphoprotein;Polymorphism;Referenceproteome;Spliceosome	3	3.01047	0.00883478	-1.49827	-1.27739	1.91186	0.0956148	-1.05012	-0.845546	0.997593	0.595185	0.448144	0.370152	0.963343	0.676088	0.422947	0.343796	1.55053	0.300548	0.647019	0.542698	3.13323	0.0973314	-1.2742	-1.04138	1.7061	0.0865901	-0.851249	-0.694307	>sp|Q9HCG8|CWC22_HUMAN Pre-mRNA-splicing factor CWC22 homolog OS=Homo sapiens GN=CWC22 PE=1 SV=3	Q9HCG8	Pre-mRNA-splicing factor CWC22 homolog	CWC22_HUMAN	13.9864	13.6573	14.1639
CWC27	+	+						+	+	catalytic activity;cis-trans isomerase activity;isomerase activity;peptidyl-prolyl cis-trans isomerase activity	cellular metabolic process;cellular nitrogen compound metabolic process;cellular process;macromolecule metabolic process;macromolecule modification;metabolic process;mRNA metabolic process;mRNA processing;nitrogen compound metabolic process;nucleobase-containing compound metabolic process;peptidyl-amino acid modification;primary metabolic process;protein folding;protein metabolic process;protein …	cell part;macromolecular complex;ribonucleoprotein complex;spliceosomal complex	3D-structure;Acetylation;Alternativesplicing;Coiledcoil;Completeproteome;Glycoprotein;Isomerase;Polymorphism;Referenceproteome;Rotamase	7	3.91448	0.00907975	-1.3854	-1.26672	2.48249	0.081869	-1.03921	-0.891557	1.15557	0.66559	0.346191	0.303442	0.0628177	0.971002	0.0318772	0.0269873	0.547771	0.722113	0.204973	0.175864	3.93107	0.096849	-1.2123	-1.04721	2.49188	0.024426	-1.18043	-0.994448	>sp|Q6UX04|CWC27_HUMAN Peptidyl-prolyl cis-trans isomerase CWC27 homolog OS=Homo sapiens GN=CWC27 PE=1 SV=1	Q6UX04	Peptidyl-prolyl cis-trans isomerase CWC27 homolog	CWC27_HUMAN	15.784	16.0822	16.0164
CXADR	+	+						+	+	beta-catenin binding;binding;cell adhesion molecule binding;connexin binding;identical protein binding;integrin binding;PDZ domain binding;protein binding;protein complex binding;protein domain specific binding;receptor activity;receptor binding;viral receptor activity	anatomical structure development;biological adhesion;biological regulation;cell activation;cell adhesion;cell development;cell junction organization;cell motility;cellular component movement;cellular component organization;cellular process;coagulation;cytoskeleton organization;developmental process;establishment of localization;homeostatic process;immune system process;locomotion;mitochondrion or…	cell body;cell part;cell projection;cytoplasm;cytoplasmic membrane-bounded vesicle;extracellular region;extracellular space;filopodium;intracellular membrane-bounded organelle;intracellular organelle;macromolecular complex;membrane;neuron projection;nucleoplasm;organelle;plasma membrane;protein complex;site of polarized growth;synapse;vesicle	3D-structure;Alternativesplicing;Celladhesion;Celljunction;Cellmembrane;Completeproteome;Disulfidebond;Glycoprotein;Hostcellreceptorforvirusentry;Host-virusinteraction;Immunoglobulindomain;Lipoprotein;Membrane;Palmitate;Phosphoprotein;Polymorphism;Receptor;Referenceproteome;Repeat;Secreted;Signal;Tightjunction;Transmembrane;Transmembranehelix	6	3.10536	0.00306276	2.53365	1.98525	2.9764	0.00807605	2.50621	1.93495	0.0274305	0.985017	-0.0274372	-0.020541	0.799085	0.71302	0.347559	0.284789	0.667998	0.5755	0.33384	0.272153	4.76875	0.033519	2.51993	2.02658	4.23682	0.00186207	2.86749	2.47048	>sp|P78310|CXAR_HUMAN Coxsackievirus and adenovirus receptor OS=Homo sapiens GN=CXADR PE=1 SV=1	P78310	Coxsackievirus and adenovirus receptor	CXAR_HUMAN	20.4566	20.0107	19.9522
CYB5R1	+	+						+	+	catalytic activity;cytochrome-b5 reductase activity;oxidoreductase activity;oxidoreductase activity, acting on NADH or NADPH;oxidoreductase activity, acting on NADH or NADPH, heme protein as acceptor	alcohol metabolic process;biosynthetic process;lipid metabolic process;metabolic process;primary metabolic process;small molecule metabolic process	cell part;extracellular organelle;intracellular membrane-bounded organelle;intracellular organelle;membrane;mitochondrion;organelle;vesicle	Completeproteome;Directproteinsequencing;FAD;Flavoprotein;Lipidbiosynthesis;Lipidmetabolism;Membrane;NAD;Oxidoreductase;Polymorphism;Referenceproteome;Steroidbiosynthesis;Steroidmetabolism;Sterolbiosynthesis;Sterolmetabolism;Transmembrane;Transmembranehelix	3	3.74011	0.00166443	2.75818	2.28596	0.848243	0.0574809	2.19873	0.99766	0.174215	0.722397	-0.559447	-0.252371	0.460211	0.608611	-0.840053	-0.458406	1.65201	0.135873	-1.11978	-0.855436	1.71665	0.0401375	2.47846	1.36265	2.52922	0.00747386	1.6384	1.30695	>sp|Q9UHQ9|NB5R1_HUMAN NADH-cytochrome b5 reductase 1 OS=Homo sapiens GN=CYB5R1 PE=1 SV=1	Q9UHQ9	NADH-cytochrome b5 reductase 1	NB5R1_HUMAN	15.272	15.071	15.0251
CYB5R3	+	+						+	+	adenyl nucleotide binding;adenyl ribonucleotide binding;ADP binding;AMP binding;binding;catalytic activity;coenzyme binding;cofactor binding;cytochrome-b5 reductase activity;FAD binding;flavin adenine dinucleotide binding;NAD binding;nucleotide binding;oxidoreductase activity;oxidoreductase activity, acting on NADH or NADPH;oxidoreductase activity, acting on NADH or NADPH, heme protein as accepto…	alcohol metabolic process;biosynthetic process;blood circulation;cellular ketone metabolic process;cellular metabolic process;cellular process;circulatory system process;lipid metabolic process;metabolic process;multicellular organismal process;organic acid metabolic process;primary metabolic process;small molecule metabolic process;vitamin metabolic process	cell part;cytoplasm;endoplasmic reticulum;extracellular organelle;intracellular membrane-bounded organelle;intracellular organelle;lipid particle;macromolecular complex;membrane;mitochondrion;organelle;protein complex;vesicle	3D-structure;Acetylation;Alternativepromoterusage;Alternativesplicing;Cholesterolbiosynthesis;Cholesterolmetabolism;Completeproteome;Cytoplasm;Directproteinsequencing;Diseasemutation;Endoplasmicreticulum;FAD;Flavoprotein;Lipidbiosynthesis;Lipidmetabolism;Lipoprotein;Membrane;Mitochondrion;Mitochondrionoutermembrane;Myristate;NAD;Oxidoreductase;Phosphoprotein;Polymorphism;Referenceproteome;Steroid…	15	4.97191	0.00275188	2.06691	1.92155	2.86372	0.0136667	1.98215	1.58579	0.122884	0.9356	-0.0847594	-0.0676967	0.230238	0.909991	-0.100954	-0.0856923	0.58156	0.803151	-0.143333	-0.129143	5.16967	0.0292	2.02453	1.72995	4.28263	0.00334177	1.92357	1.74084	>sp|P00387|NB5R3_HUMAN NADH-cytochrome b5 reductase 3 OS=Homo sapiens GN=CYB5R3 PE=1 SV=3	P00387	NADH-cytochrome b5 reductase 3	NB5R3_HUMAN	21.3679	21.2056	21.2517
CYBRD1	+	+				+		+		binding;catalytic activity;cation binding;ferric-chelate reductase activity;ion binding;metal ion binding;oxidoreductase activity;oxidoreductase activity, oxidizing metal ions;oxidoreductase activity, oxidizing metal ions, NAD or NADP as acceptor	biological regulation;cellular homeostasis;cellular ion homeostasis;cellular process;establishment of localization;homeostatic process;response to chemical stimulus;response to stimulus;transmembrane transport;transport	cell part;extracellular organelle;membrane;organelle;plasma membrane;vesicle	Alternativesplicing;Completeproteome;Electrontransport;Glycoprotein;Heme;Iron;Membrane;Metal-binding;Oxidoreductase;Phosphoprotein;Polymorphism;Referenceproteome;Transmembrane;Transmembranehelix;Transport	5	3.56393	0.00244	2.17916	1.84517	1.25876	0.0917258	1.25573	0.855288	0.85972	0.360514	-0.92343	-0.615873	1.04573	0.510645	-1.01411	-0.669029	1.55968	0.0834201	-1.47583	-1.02808	2.20227	0.0647753	1.71745	1.18783	0.815262	0.203061	0.703339	0.502611	>sp|Q53TN4|CYBR1_HUMAN Cytochrome b reductase 1 OS=Homo sapiens GN=CYBRD1 PE=1 SV=1	Q53TN4	Cytochrome b reductase 1	CYBR1_HUMAN	17.1621	17.0407	17.0768
CYFIP2	+	+						+	+		biological adhesion;biological regulation;cell adhesion;cell death;cellular process;death;immune system process;response to chemical stimulus;response to stimulus;response to stress;signal transduction	cell part;cell projection;cytoplasm;cytosol;extracellular organelle;membrane;neuron projection;organelle;synapse;vesicle	Acetylation;Alternativesplicing;Apoptosis;Celladhesion;Celljunction;Completeproteome;Cytoplasm;Referenceproteome;RNAediting;Synapse;Synaptosome	4	1.90213	0.00807939	2.01442	1.37298	2.39599	0.011838	2.39052	1.70487	0.272857	0.732149	0.376106	0.242235	0.278567	0.768299	-0.324536	-0.218241	0.0765242	0.880273	-0.136483	-0.0838632	3.0295	0.0329378	2.20247	1.57035	1.70231	0.00833384	1.87793	1.25195	>sp|Q96F07|CYFP2_HUMAN Cytoplasmic FMR1-interacting protein 2 OS=Homo sapiens GN=CYFIP2 PE=1 SV=2	Q96F07	Cytoplasmic FMR1-interacting protein 2	CYFP2_HUMAN	15.9677	16.6366	16.3025
CYP2S1	+	+		+	iPSC_NSC	+		+		arachidonic acid epoxygenase activity;arachidonic acid monooxygenase activity;aromatase activity;binding;catalytic activity;cation binding;heme binding;ion binding;iron ion binding;metal ion binding;monooxygenase activity;oxidoreductase activity;oxidoreductase activity, acting on paired donors, with incorporation or reduction of molecular oxygen;oxidoreductase activity, acting on paired donors, w…	catabolic process;cellular ketone metabolic process;cellular lipid metabolic process;cellular metabolic process;cellular process;drug metabolic process;lipid metabolic process;metabolic process;organic acid metabolic process;primary metabolic process;small molecule metabolic process;xenobiotic metabolic process	cell part;cytoplasm;endoplasmic reticulum;intracellular membrane-bounded organelle;intracellular organelle;membrane;organelle	Alternativesplicing;Completeproteome;Endoplasmicreticulum;Heme;Iron;Membrane;Metal-binding;Microsome;Monooxygenase;Oxidoreductase;Polymorphism;Referenceproteome	12	3.28232	0.00302439	-3.70754	-2.71863	4.81343	0.00936842	-3.6876	-3.21244	0.0191601	0.990188	0.0199432	0.014813	5.9652	0.082	3.65448	2.96025	3.32088	0.0225455	3.66445	2.71161	5.90123	0.0452632	-3.69757	-2.97601	0.0967561	0.947708	-0.0430927	-0.0371678	>sp|Q96SQ9|CP2S1_HUMAN Cytochrome P450 2S1 OS=Homo sapiens GN=CYP2S1 PE=1 SV=2	Q96SQ9	Cytochrome P450 2S1	CP2S1_HUMAN	14.5738	14.918	14.4903
DAZAP1	+	+				+		+		binding;nucleic acid binding;nucleotide binding;RNA binding;RNA stem-loop binding	anatomical structure development;biological regulation;cell differentiation;cell proliferation;cellular process;developmental process;multicellular organismal process	cell part;cytoplasm;nucleoplasm	3D-structure;Acetylation;Alternativesplicing;Completeproteome;Cytoplasm;Developmentalprotein;Differentiation;Directproteinsequencing;Nucleus;Polymorphism;Referenceproteome;Repeat;RNA-binding;Spermatogenesis	7	4.15378	0.0139808	-1.1957	-1.11714	3.80002	0.0596113	-1.0629	-0.987034	0.805149	0.869768	0.132807	0.123395	6.14852	0.29581	1.30257	1.20766	4.13715	0.0350303	1.36897	1.26604	5.90705	0.0954639	-1.1293	-1.05158	0.992652	0.75318	0.173266	0.160157	>sp|Q96EP5|DAZP1_HUMAN DAZ-associated protein 1 OS=Homo sapiens GN=DAZAP1 PE=1 SV=1	Q96EP5	DAZ-associated protein 1	DAZP1_HUMAN	19.0289	19.1061	19.2023
DBI	+							+		benzodiazepine receptor binding;binding;lipid binding;protein binding;protein dimerization activity;receptor binding	anatomical structure development;behavior;biological regulation;cellular lipid metabolic process;cellular metabolic process;cellular process;developmental process;establishment of localization;glycerol ether metabolic process;lipid metabolic process;metabolic process;molting cycle;multicellular organismal process;neurological system process;primary metabolic process;response to stimulus;response …	cell part;endoplasmic reticulum;extracellular organelle;Golgi apparatus;intracellular membrane-bounded organelle;intracellular organelle;mitochondrion;organelle;vesicle	3D-structure;Acetylation;Alternativepromoterusage;Alternativesplicing;Completeproteome;Directproteinsequencing;Endoplasmicreticulum;Golgiapparatus;Lipid-binding;Phosphoprotein;Polymorphism;Referenceproteome;Transport	3	4.44403	0.00481746	1.64538	1.52103	1.50628	0.11553	1.04091	0.788812	0.882059	0.50301	-0.604469	-0.458203	0.693334	0.63701	-0.560616	-0.400779	0.948742	0.260448	-0.862851	-0.605269	2.61814	0.097481	1.34314	1.04092	0.853897	0.167076	0.782528	0.548816	>sp|P07108|ACBP_HUMAN Acyl-CoA-binding protein OS=Homo sapiens GN=DBI PE=1 SV=2	P07108	Acyl-CoA-binding protein	ACBP_HUMAN	17.4134	17.6137	17.5466
DBNL	+	+						+		actin binding;actin filament binding;binding;cytoskeletal protein binding;enzyme activator activity;enzyme regulator activity;protein binding	anatomical structure morphogenesis;biological regulation;cell death;cellular component assembly;cellular component disassembly;cellular component morphogenesis;cellular component organization;cellular membrane organization;cellular metabolic process;cellular process;death;developmental process;endocytosis;establishment of localization;immune system process;macromolecular complex assembly;macromol…	cell cortex;cell part;cell projection;cytoplasm;cytosol;extracellular organelle;intracellular non-membrane-bounded organelle;intracellular organelle;macromolecular complex;membrane;neuron projection;organelle;plasma membrane;protein complex;vesicle	3D-structure;Acetylation;Actin-binding;Adaptiveimmunity;Alternativesplicing;Celljunction;Cellmembrane;Cellprojection;Coiledcoil;Completeproteome;Cytoplasm;Cytoplasmicvesicle;Cytoskeleton;Endocytosis;Golgiapparatus;Immunity;Membrane;Phosphoprotein;Referenceproteome;SH3domain;Synapse;Transport	21	2.76611	0.00882273	1.60167	1.31899	2.6936	0.0490727	1.22523	1.04598	0.648089	0.67344	-0.376435	-0.298168	1.78301	0.511218	-0.855946	-0.672395	1.44783	0.168128	-1.04416	-0.782097	3.51036	0.0689087	1.41345	1.16365	0.968228	0.275778	0.557502	0.439078	>sp|Q9UJU6|DBNL_HUMAN Drebrin-like protein OS=Homo sapiens GN=DBNL PE=1 SV=1	Q9UJU6	Drebrin-like protein	DBNL_HUMAN	20.4795	20.4103	20.2863
DCN	+		+			+		+	+	binding;carbohydrate binding;extracellular matrix binding;glycosaminoglycan binding;pattern binding;polysaccharide binding	aging;amine metabolic process;anatomical structure development;anatomical structure morphogenesis;biological regulation;biosynthetic process;carbohydrate metabolic process;catabolic process;cellular component disassembly;cellular component organization;cellular metabolic process;cellular process;developmental process;extracellular matrix organization;extracellular structure organization;macromole…	cell part;extracellular region;extracellular space	Alternativesplicing;Completeproteome;Cornealdystrophy;Directproteinsequencing;Disulfidebond;Extracellularmatrix;Glycoprotein;Leucine-richrepeat;Polymorphism;Proteoglycan;Referenceproteome;Repeat;Secreted;Signal	3	4.61165	0.00688889	4.38415	3.66062	1.00151	0.100699	1.35805	0.830049	2.04791	0.0167389	-3.0261	-1.84884	0.277121	0.645727	-0.933653	-0.387836	0.811486	0.0871418	-2.4467	-1.02151	1.48994	0.0390539	2.8711	1.38135	0.62493	0.0561172	1.93745	0.808993	>sp|P07585|PGS2_HUMAN Decorin OS=Homo sapiens GN=DCN PE=1 SV=1	P07585	Decorin	PGS2_HUMAN	16.9016	16.8156	16.4505
DCTN2	+	+						+		binding;catalytic activity;cytoskeletal protein binding;hydrolase activity;hydrolase activity, acting on acid anhydrides;hydrolase activity, acting on acid anhydrides, in phosphorus-containing anhydrides;motor activity;nucleoside-triphosphatase activity;protein binding;pyrophosphatase activity;spectrin binding	cell cycle;cell proliferation;cellular component organization;cellular process;cytoskeleton organization;establishment of localization;immune system process;mitosis;mitotic cell cycle;nuclear division;organelle fission;organelle organization;transport	cell part;centrosome;cytoplasm;cytosol;extracellular organelle;intracellular non-membrane-bounded organelle;intracellular organelle;kinetochore;macromolecular complex;membrane;microtubule organizing center;organelle;protein complex;site of polarized growth;vesicle	Acetylation;Alternativesplicing;Coiledcoil;Completeproteome;Cytoplasm;Cytoskeleton;Directproteinsequencing;Dynein;Membrane;Microtubule;Phosphoprotein;Referenceproteome	18	2.88724	0.024154	1.08881	0.959002	3.65484	0.0357976	1.24619	1.13484	0.544049	0.850218	0.157384	0.139544	3.07996	0.567346	-0.576222	-0.522302	1.82205	0.381937	-0.497531	-0.443487	4.83542	0.0956078	1.1675	1.05161	2.55284	0.170911	0.591276	0.542358	>sp|Q13561|DCTN2_HUMAN Dynactin subunit 2 OS=Homo sapiens GN=DCTN2 PE=1 SV=4	Q13561	Dynactin subunit 2	DCTN2_HUMAN	20.4552	20.3617	20.1947
DCUN1D5	+	+						+	+				Completeproteome;Phosphoprotein;Referenceproteome	2	2.06185	0.0117938	-1.52527	-1.15724	1.99027	0.0211502	-1.91076	-1.34778	0.458124	0.687498	-0.385492	-0.282805	0.0652686	0.948601	0.0602082	0.0452644	0.145481	0.853433	-0.132538	-0.0990204	2.97159	0.0479388	-1.71801	-1.30024	1.85681	0.00992771	-1.6578	-1.18712	>sp|Q9BTE7|DCNL5_HUMAN DCN1-like protein 5 OS=Homo sapiens GN=DCUN1D5 PE=1 SV=1	Q9BTE7	DCN1-like protein 5	DCNL5_HUMAN	13.1466	12.6768	13.6056
DDAH1	+	+						+	+	amine binding;amino acid binding;binding;carboxylic acid binding;catalytic activity;cation binding;dimethylargininase activity;hydrolase activity;hydrolase activity, acting on carbon-nitrogen (but not peptide) bonds;hydrolase activity, acting on carbon-nitrogen (but not peptide) bonds, in linear amidines;ion binding;metal ion binding	amine metabolic process;biological regulation;catabolic process;cellular amino acid metabolic process;cellular ketone metabolic process;cellular metabolic process;cellular nitrogen compound metabolic process;cellular process;metabolic process;nitrogen compound metabolic process;organic acid metabolic process;primary metabolic process;response to stimulus;signal transduction;small molecule metabol…	cell part;extracellular organelle;intracellular membrane-bounded organelle;intracellular organelle;mitochondrion;organelle;vesicle	3D-structure;Acetylation;Alternativesplicing;Completeproteome;Directproteinsequencing;Hydrolase;Metal-binding;Referenceproteome;S-nitrosylation;Zinc	12	5.63188	0.00318261	2.10095	1.9961	3.31924	0.021033	1.5496	1.34896	1.68681	0.481586	-0.551344	-0.48009	0.333984	0.85764	-0.171096	-0.140169	1.57869	0.424855	-0.446768	-0.395366	4.31981	0.0342905	1.82528	1.51293	3.65312	0.00584332	1.65418	1.46338	>sp|O94760|DDAH1_HUMAN N(G),N(G)-dimethylarginine dimethylaminohydrolase 1 OS=Homo sapiens GN=DDAH1 PE=1 SV=3	O94760	N(G),N(G)-dimethylarginine dimethylaminohydrolase 1	DDAH1_HUMAN	18.8805	18.8609	18.7586
DDI2	+	+						+	+	aspartic-type endopeptidase activity;aspartic-type peptidase activity;catalytic activity;endopeptidase activity;hydrolase activity;peptidase activity;peptidase activity, acting on L-amino acid peptides		cell part;cytoplasm;nucleoplasm	Alternativesplicing;Completeproteome;Phosphoprotein;Referenceproteome	4	4.31746	0.00263939	-1.84254	-1.67728	1.97813	0.0127982	-2.52982	-1.62425	0.540484	0.520258	-0.687273	-0.44015	0.651123	0.635918	0.577882	0.40341	1.09133	0.66061	0.234245	0.212773	2.83349	0.0334128	-2.18618	-1.52639	4.52805	0.00626173	-1.6083	-1.49455	>sp|Q5TDH0|DDI2_HUMAN Protein DDI1 homolog 2 OS=Homo sapiens GN=DDI2 PE=1 SV=1	Q5TDH0	Protein DDI1 homolog 2	DDI2_HUMAN	14.7806	14.6065	14.6592
DDX18	+	+						+	+	adenyl nucleotide binding;adenyl ribonucleotide binding;ATP binding;ATPase activity;ATPase activity, coupled;ATP-dependent helicase activity;ATP-dependent RNA helicase activity;binding;catalytic activity;helicase activity;hydrolase activity;hydrolase activity, acting on acid anhydrides;hydrolase activity, acting on acid anhydrides, in phosphorus-containing anhydrides;nucleoside-triphosphatase act…	cellular metabolic process;cellular nitrogen compound metabolic process;cellular process;macromolecule metabolic process;metabolic process;nitrogen compound metabolic process;nucleobase-containing compound metabolic process;primary metabolic process;RNA metabolic process	cell part;cytoplasm;intracellular non-membrane-bounded organelle;intracellular organelle;membrane;nucleolus;organelle	3D-structure;ATP-binding;Completeproteome;Directproteinsequencing;Helicase;Hydrolase;Nucleotide-binding;Nucleus;Polymorphism;Referenceproteome;RNA-binding	18	2.82114	0.00833983	-1.60467	-1.32877	1.94185	0.0317054	-1.58729	-1.1685	0.0175032	0.990736	0.0173759	0.0130674	1.10686	0.660871	0.446475	0.366994	1.82725	0.41483	0.455163	0.409656	3.48037	0.0504706	-1.59598	-1.28177	2.51869	0.0265873	-1.1495	-0.974898	>sp|Q9NVP1|DDX18_HUMAN ATP-dependent RNA helicase DDX18 OS=Homo sapiens GN=DDX18 PE=1 SV=2	Q9NVP1	ATP-dependent RNA helicase DDX18	DDX18_HUMAN	17.0914	16.9361	17.5283
DDX21	+	+						+		adenyl nucleotide binding;adenyl ribonucleotide binding;ATP binding;ATPase activity;ATPase activity, coupled;ATP-dependent helicase activity;ATP-dependent RNA helicase activity;binding;catalytic activity;double-stranded RNA binding;helicase activity;hydrolase activity;hydrolase activity, acting on acid anhydrides;hydrolase activity, acting on acid anhydrides, in phosphorus-containing anhydrides;n…	biosynthetic process;cell differentiation;cellular metabolic process;cellular nitrogen compound metabolic process;cellular process;developmental process;macromolecule metabolic process;metabolic process;multi-organism process;nitrogen compound metabolic process;nucleobase-containing compound metabolic process;primary metabolic process;response to biotic stimulus;response to chemical stimulus;resp…	cell part;cytoplasm;intracellular membrane-bounded organelle;intracellular non-membrane-bounded organelle;intracellular organelle;membrane;nucleolus;nucleoplasm;nucleus;organelle	3D-structure;Acetylation;Alternativesplicing;ATP-binding;Completeproteome;Directproteinsequencing;Helicase;Hydrolase;Nucleotide-binding;Nucleus;Phosphoprotein;Polymorphism;Referenceproteome;Repeat;RNA-binding;rRNAprocessing;Transcription	31	3.879	0.0106344	-1.31325	-1.20408	2.67832	0.0261174	-1.51801	-1.25009	0.38817	0.814291	-0.204757	-0.16752	2.08998	0.545154	0.691819	0.581702	1.57519	0.326917	0.589441	0.502948	4.26349	0.0599037	-1.41563	-1.21685	1.9592	0.114881	-0.723812	-0.623146	>sp|Q9NR30|DDX21_HUMAN Nucleolar RNA helicase 2 OS=Homo sapiens GN=DDX21 PE=1 SV=5	Q9NR30	Nucleolar RNA helicase 2	DDX21_HUMAN	21.1883	21.089	21.0206
DDX5	+	+						+	+	adenyl nucleotide binding;adenyl ribonucleotide binding;androgen receptor binding;ATP binding;ATPase activity;ATPase activity, coupled;ATP-dependent helicase activity;ATP-dependent RNA helicase activity;binding;catalytic activity;estrogen receptor binding;helicase activity;hormone receptor binding;hydrolase activity;hydrolase activity, acting on acid anhydrides;hydrolase activity, acting on acid …	biological regulation;biosynthetic process;cell growth;cellular metabolic process;cellular nitrogen compound metabolic process;cellular process;developmental process;embryo development;growth;macromolecule metabolic process;metabolic process;mRNA metabolic process;mRNA processing;nitrogen compound metabolic process;nucleobase-containing compound metabolic process;primary metabolic process;respons…	cell part;cytoplasm;extracellular organelle;intracellular membrane-bounded organelle;intracellular non-membrane-bounded organelle;intracellular organelle;macromolecular complex;membrane;nucleolus;nucleoplasm;nucleus;organelle;ribonucleoprotein complex;spliceosomal complex;vesicle	3D-structure;Acetylation;Alternativesplicing;ATP-binding;Biologicalrhythms;Completeproteome;Helicase;Hydrolase;Isopeptidebond;mRNAprocessing;mRNAsplicing;Nucleotide-binding;Nucleus;Phosphoprotein;Polymorphism;Referenceproteome;RNA-binding;Spliceosome;Transcription;Transcriptionregulation;Ublconjugation	24	4.84272	0.00509231	-1.60314	-1.50781	3.67503	0.0132851	-1.82427	-1.59751	0.733322	0.781308	-0.221127	-0.194281	0.887998	0.793005	0.22015	0.195148	0.524179	0.850389	0.109586	0.10036	5.69643	0.0331724	-1.7137	-1.5295	3.97505	0.00665169	-1.49355	-1.36088	>sp|P17844|DDX5_HUMAN Probable ATP-dependent RNA helicase DDX5 OS=Homo sapiens GN=DDX5 PE=1 SV=1	P17844	Probable ATP-dependent RNA helicase DDX5	DDX5_HUMAN	20.068	20.0943	19.9321
DES	+	+						+	+	binding;cytoskeletal protein binding;identical protein binding;protein binding;structural constituent of cytoskeleton;structural molecule activity	biological regulation;cellular component movement;cellular component organization;cellular process;cytoskeleton organization;multicellular organismal process;muscle contraction;organelle organization	cell part;cytosol;extracellular organelle;macromolecular complex;membrane;organelle;plasma membrane;protein complex;synapse;vesicle	ADP-ribosylation;Cardiomyopathy;Cellmembrane;Coiledcoil;Completeproteome;Cytoplasm;Desmin-relatedmyopathy;Diseasemutation;Intermediatefilament;Limb-girdlemusculardystrophy;Membrane;Muscleprotein;Myofibrillarmyopathy;Phosphoprotein;Referenceproteome	5	1.49335	0.00838039	2.32693	1.35176	3.34181	0.00528571	2.90294	2.27693	0.324223	0.638434	0.576009	0.333028	0.241613	0.775433	-0.327555	-0.210708	0.0170818	0.96633	-0.0395508	-0.0223619	2.78846	0.0295226	2.61493	1.71288	2.47506	0.0037276	2.28738	1.67425	>sp|P17661|DESM_HUMAN Desmin OS=Homo sapiens GN=DES PE=1 SV=3	P17661	Desmin	DESM_HUMAN	20.3872	20.1894	20.7955
DHX15	+	+						+	+	adenyl nucleotide binding;adenyl ribonucleotide binding;ATP binding;ATPase activity;ATPase activity, coupled;ATP-dependent helicase activity;ATP-dependent RNA helicase activity;binding;catalytic activity;double-stranded RNA binding;helicase activity;hydrolase activity;hydrolase activity, acting on acid anhydrides;hydrolase activity, acting on acid anhydrides, in phosphorus-containing anhydrides;n…	cellular metabolic process;cellular nitrogen compound metabolic process;cellular process;macromolecule metabolic process;metabolic process;mRNA metabolic process;mRNA processing;nitrogen compound metabolic process;nucleobase-containing compound metabolic process;primary metabolic process;RNA metabolic process;RNA processing;RNA splicing	cell part;cytoplasm;intracellular membrane-bounded organelle;intracellular non-membrane-bounded organelle;intracellular organelle;macromolecular complex;nucleolus;nucleoplasm;nucleus;organelle;ribonucleoprotein complex;spliceosomal complex	Acetylation;ATP-binding;Completeproteome;Helicase;Hydrolase;mRNAprocessing;mRNAsplicing;Nucleotide-binding;Nucleus;Referenceproteome	35	3.75435	0.00778549	-1.55121	-1.39096	2.881	0.0539636	-1.16396	-1.01634	1.16785	0.635917	0.387255	0.335018	0.546316	0.78649	-0.245598	-0.202672	0.0812023	0.940166	-0.0519708	-0.0423877	4.04774	0.0689904	-1.35759	-1.16108	2.73329	0.00744425	-1.60318	-1.31532	>sp|O43143|DHX15_HUMAN Pre-mRNA-splicing factor ATP-dependent RNA helicase DHX15 OS=Homo sapiens GN=DHX15 PE=1 SV=2	O43143	Pre-mRNA-splicing factor ATP-dependent RNA helicase DHX15	DHX15_HUMAN	19.6857	19.5188	19.7584
DHX30	+	+						+	+	adenyl nucleotide binding;adenyl ribonucleotide binding;ATP binding;ATPase activity;ATPase activity, coupled;ATP-dependent helicase activity;ATP-dependent RNA helicase activity;binding;catalytic activity;chromatin binding;double-stranded RNA binding;helicase activity;hydrolase activity;hydrolase activity, acting on acid anhydrides;hydrolase activity, acting on acid anhydrides, in phosphorus-conta…	cellular metabolic process;cellular nitrogen compound metabolic process;cellular process;macromolecule metabolic process;metabolic process;nitrogen compound metabolic process;nucleobase-containing compound metabolic process;primary metabolic process;RNA metabolic process;RNA processing	cell part;cytoplasm;intracellular membrane-bounded organelle;intracellular non-membrane-bounded organelle;intracellular organelle;mitochondrion;nucleus;organelle	3D-structure;Alternativesplicing;ATP-binding;Completeproteome;Cytoplasm;Helicase;Hydrolase;Mitochondrion;Mitochondrionnucleoid;Nucleotide-binding;Phosphoprotein;Referenceproteome;RNA-binding	16	4.0707	0.00567547	-1.65006	-1.49751	2.13194	0.0231313	-1.73634	-1.29018	0.090855	0.939991	-0.0862808	-0.0644736	0.382092	0.837134	0.194117	0.158593	1.21616	0.780125	0.150976	0.142655	3.80468	0.0393018	-1.6932	-1.37595	4.06856	0.00655449	-1.49908	-1.37196	>sp|Q7L2E3|DHX30_HUMAN Putative ATP-dependent RNA helicase DHX30 OS=Homo sapiens GN=DHX30 PE=1 SV=1	Q7L2E3	Putative ATP-dependent RNA helicase DHX30	DHX30_HUMAN	17.7904	17.5775	17.4941
DHX36	+	+						+		adenyl nucleotide binding;adenyl ribonucleotide binding;ATP binding;ATPase activity;ATPase activity, coupled;ATP-dependent helicase activity;ATP-dependent RNA helicase activity;binding;catalytic activity;core promoter binding;DNA binding;DNA-dependent ATPase activity;double-stranded RNA binding;enzyme binding;G-quadruplex DNA binding;G-quadruplex RNA binding;helicase activity;histone deacetylase …	biological regulation;biosynthetic process;cellular metabolic process;cellular nitrogen compound metabolic process;cellular process;immune system process;macromolecule metabolic process;metabolic process;multicellular organismal process;multi-organism process;nitrogen compound metabolic process;nucleobase-containing compound metabolic process;primary metabolic process;regulation of DNA metabolic …	cell part;cytoplasm;cytosol;extracellular organelle;intracellular membrane-bounded organelle;intracellular organelle;nucleus;organelle;vesicle	Acetylation;Alternativesplicing;ATP-binding;Chromosome;Coiledcoil;Completeproteome;Cytoplasm;DNA-binding;Helicase;Hydrolase;Nucleotide-binding;Nucleus;Polymorphism;Referenceproteome;RNA-binding;Telomere;Transcription;Transcriptionregulation	12	2.92965	0.0228941	-1.1096	-0.978095	2.53927	0.0441659	-1.27957	-1.06913	0.356486	0.847596	-0.169977	-0.141827	2.97582	0.505318	0.819702	0.710904	2.29344	0.2328	0.734713	0.649102	3.9551	0.0972255	-1.19459	-1.03518	1.35413	0.429085	-0.374885	-0.331933	>sp|Q9H2U1|DHX36_HUMAN ATP-dependent RNA helicase DHX36 OS=Homo sapiens GN=DHX36 PE=1 SV=2	Q9H2U1	ATP-dependent RNA helicase DHX36	DHX36_HUMAN	15.4485	15.6901	15.3832
DHX37	+	+						+	+	adenyl nucleotide binding;adenyl ribonucleotide binding;ATP binding;ATPase activity;ATPase activity, coupled;ATP-dependent helicase activity;ATP-dependent RNA helicase activity;binding;catalytic activity;helicase activity;hydrolase activity;hydrolase activity, acting on acid anhydrides;hydrolase activity, acting on acid anhydrides, in phosphorus-containing anhydrides;nucleoside-triphosphatase act…	cellular metabolic process;cellular nitrogen compound metabolic process;cellular process;macromolecule metabolic process;metabolic process;nitrogen compound metabolic process;nucleobase-containing compound metabolic process;primary metabolic process;RNA metabolic process;RNA processing	cell part;cytoplasm;intracellular non-membrane-bounded organelle;intracellular organelle;nucleolus;organelle	ATP-binding;Completeproteome;Helicase;Hydrolase;Nucleotide-binding;Polymorphism;Referenceproteome	6	4.49869	0.00339726	3.21816	2.78651	2.53075	0.00768317	3.15511	2.12048	0.045617	0.962505	-0.0630512	-0.0428188	0.16799	0.886666	0.151577	0.11216	0.173714	0.862422	0.120052	0.0951452	4.6297	0.0378095	3.18663	2.40837	3.49568	0.00229787	3.33821	2.59045	>sp|Q8IY37|DHX37_HUMAN Probable ATP-dependent RNA helicase DHX37 OS=Homo sapiens GN=DHX37 PE=1 SV=1	Q8IY37	Probable ATP-dependent RNA helicase DHX37	DHX37_HUMAN	20.1029	20.0114	19.6469
DKC1	+	+						+	+	binding;catalytic activity;DNA polymerase activity;intramolecular transferase activity;isomerase activity;nucleic acid binding;nucleotidyltransferase activity;pseudouridine synthase activity;RNA binding;RNA-directed DNA polymerase activity;telomerase activity;transferase activity;transferase activity, transferring phosphorus-containing groups	biological regulation;biosynthetic process;cell proliferation;cellular component organization;cellular metabolic process;cellular nitrogen compound metabolic process;cellular process;chromosome organization;DNA metabolic process;DNA replication;homeostatic process;macromolecule metabolic process;macromolecule modification;metabolic process;nitrogen compound metabolic process;nucleobase-containing…	cell part;cytoplasm;intracellular membrane-bounded organelle;intracellular non-membrane-bounded organelle;intracellular organelle;macromolecular complex;nucleolus;nucleoplasm;nucleus;organelle;ribonucleoprotein complex;small nucleolar ribonucleoprotein complex;telomerase holoenzyme complex	Acetylation;Alternativesplicing;Completeproteome;Cytoplasm;Directproteinsequencing;Diseasemutation;Dyskeratosiscongenita;Isomerase;Nucleus;Phosphoprotein;Referenceproteome;Ribonucleoprotein;Ribosomebiogenesis;RNA-binding;rRNAprocessing	17	2.29428	0.0203136	-1.23666	-1.0121	2.57699	0.0554105	-1.18541	-1.00617	0.123388	0.959745	0.0512447	0.0444902	0.822547	0.763267	-0.258621	-0.222912	0.417636	0.703555	-0.232999	-0.188269	4.06134	0.0953152	-1.21104	-1.05286	2.34577	0.0109215	-1.46966	-1.17085	>sp|O60832|DKC1_HUMAN H/ACA ribonucleoprotein complex subunit 4 OS=Homo sapiens GN=DKC1 PE=1 SV=3	O60832	H/ACA ribonucleoprotein complex subunit 4	DKC1_HUMAN	16.7277	16.9386	17.3099
DLGAP5	+	+				+		+		catalytic activity;hydrolase activity;hydrolase activity, acting on ester bonds;phosphatase activity;phosphoprotein phosphatase activity;phosphoric ester hydrolase activity	biological regulation;cell proliferation;cellular component movement;cellular metabolic process;cellular process;establishment of localization;metabolic process;phosphorus metabolic process;regulation of cell cycle;regulation of mitotic cell cycle;regulation of organelle organization;signaling	cell part;centrosome;cytoplasm;intracellular membrane-bounded organelle;intracellular non-membrane-bounded organelle;intracellular organelle;microtubule organizing center;nucleus;organelle	Alternativesplicing;Cellcycle;Coiledcoil;Completeproteome;Cytoplasm;Cytoskeleton;Nucleus;Phosphoprotein;Polymorphism;Referenceproteome;Ublconjugation	3	1.90739	0.00724238	-2.06874	-1.39962	2.44535	0.0102222	-2.53288	-1.7924	0.519965	0.637832	-0.464141	-0.333419	1.98143	0.182326	3.32388	1.69716	1.01552	0.034575	3.09181	1.2729	3.31527	0.0293491	-2.30081	-1.67179	0.287997	0.299535	1.02307	0.420173	>sp|Q15398|DLGP5_HUMAN Disks large-associated protein 5 OS=Homo sapiens GN=DLGAP5 PE=1 SV=2	Q15398	Disks large-associated protein 5	DLGP5_HUMAN	13.4047	12.2122	12.6131
DMD	+	+						+	+	actin binding;binding;cation binding;cytoskeletal protein binding;dystroglycan binding;enzyme binding;glycoprotein binding;ion binding;metal ion binding;myosin binding;nitric-oxide synthase binding;protein binding;structural constituent of cytoskeleton;structural constituent of muscle;structural molecule activity;transition metal ion binding;vinculin binding;zinc ion binding	anatomical structure development;biological regulation;biosynthetic process;cell development;cellular component assembly;cellular component movement;cellular component organization;cellular homeostasis;cellular localization;cellular macromolecular complex assembly;cellular metabolic process;cellular process;developmental process;extracellular matrix organization;extracellular structure organizati…	cell part;cell projection;cell surface;cytoskeleton;cytosol;dystrophin-associated glycoprotein complex;filopodium;intracellular membrane-bounded organelle;intracellular non-membrane-bounded organelle;intracellular organelle;macromolecular complex;membrane;nucleus;organelle;plasma membrane;protein complex;synapse	3D-structure;Actin-binding;Alternativesplicing;Calcium;Cardiomyopathy;Celljunction;Cellmembrane;Completeproteome;Cytoplasm;Cytoskeleton;Diseasemutation;Membrane;Metal-binding;Phosphoprotein;Polymorphism;Postsynapticcellmembrane;Referenceproteome;Repeat;Synapse;Zinc;Zinc-finger	11	5.76397	0.00305	2.07697	1.98162	3.15751	0.0254994	1.46545	1.26893	1.83443	0.426103	-0.611523	-0.532448	0.666067	0.7418	0.306504	0.250161	0.00442842	0.998763	0.000741959	0.000703379	4.00095	0.0364664	1.77121	1.4464	5.10856	0.00437736	2.07771	1.94131	>sp|P11532|DMD_HUMAN Dystrophin OS=Homo sapiens GN=DMD PE=1 SV=3	P11532	Dystrophin	DMD_HUMAN	19.9613	20.0599	19.9019
DNAAF5	+	+						+	+	binding;dynein binding;dynein intermediate chain binding;protein binding	cellular component movement;cellular component organization;cellular process	cell part;cytoplasm	Acetylation;Alternativesplicing;Ciliopathy;Ciliumbiogenesis/degradation;Completeproteome;Cytoplasm;Directproteinsequencing;Diseasemutation;Polymorphism;Primaryciliarydyskinesia;Referenceproteome;Repeat	8	2.65112	0.00263309	2.59273	1.88944	1.53068	0.0584921	1.4141	0.991415	1.92215	0.14506	-1.17863	-0.928292	0.0740963	0.935119	-0.0875371	-0.0613737	2.10723	0.26858	-0.676853	-0.595302	2.36695	0.041915	2.00341	1.35113	2.23285	0.00643154	1.91587	1.41132	>sp|Q86Y56|DAAF5_HUMAN Dynein assembly factor 5, axonemal OS=Homo sapiens GN=DNAAF5 PE=1 SV=4	Q86Y56	Dynein assembly factor 5, axonemal	DAAF5_HUMAN	19.1969	19.2522	18.1701
DNAJA1	+	+						+	+	adenyl nucleotide binding;adenyl ribonucleotide binding;ATP binding;binding;C3HC4-type RING finger domain binding;cation binding;chaperone binding;enzyme binding;G-protein-coupled receptor binding;heat shock protein binding;Hsp70 protein binding;ion binding;lipoprotein particle receptor binding;low-density lipoprotein particle receptor binding;metal ion binding;nucleotide binding;protein binding;…	biological regulation;cell motility;cellular component movement;cellular localization;cellular metabolic process;cellular process;detection of stimulus;localization;locomotion;macromolecule metabolic process;metabolic process;multicellular organismal process;primary metabolic process;protein folding;protein metabolic process;regulation of protein modification process;regulation of transport;respo…	cell part;cytosol;extracellular organelle;intracellular membrane-bounded organelle;intracellular organelle;membrane;mitochondrion;nucleus;organelle;vesicle	3D-structure;Acetylation;Alternativesplicing;Chaperone;Completeproteome;Cytoplasm;Endoplasmicreticulum;Lipoprotein;Membrane;Metal-binding;Methylation;Microsome;Mitochondrion;Nucleus;Phosphoprotein;Prenylation;Referenceproteome;Repeat;Zinc;Zinc-finger	17	3.40664	0.0155971	-1.20436	-1.08524	5.15204	0.0358338	-1.1792	-1.13506	0.0867309	0.983723	0.0251656	0.0228159	1.50246	0.751074	-0.263901	-0.240261	0.773674	0.650574	-0.251319	-0.218603	6.12654	0.0803316	-1.19178	-1.11129	3.64412	0.00783866	-1.45568	-1.30514	>sp|P31689|DNJA1_HUMAN DnaJ homolog subfamily A member 1 OS=Homo sapiens GN=DNAJA1 PE=1 SV=2	P31689	DnaJ homolog subfamily A member 1	DNJA1_HUMAN	18.3911	18.4191	18.5178
DNAJB4	+	+						+	+	binding;chaperone binding;protein binding;unfolded protein binding	cellular metabolic process;cellular process;macromolecule metabolic process;metabolic process;primary metabolic process;protein folding;protein metabolic process;response to abiotic stimulus;response to chemical stimulus;response to heat;response to stimulus;response to stress	cell part;cytoplasm;cytosol;extracellular organelle;membrane;nucleoplasm;organelle;plasma membrane;vesicle	Cellmembrane;Chaperone;Completeproteome;Cytoplasm;Directproteinsequencing;Membrane;Phosphoprotein;Referenceproteome;Stressresponse	3	2.43851	0.0208201	1.19504	0.999402	2.43082	0.0316716	1.44586	1.16792	0.390722	0.778837	0.250826	0.197381	0.69628	0.71653	0.34504	0.277226	0.775896	0.45892	0.470453	0.367707	3.42785	0.0839802	1.32045	1.0941	2.59327	0.00717584	1.66549	1.33476	>sp|Q9UDY4|DNJB4_HUMAN DnaJ homolog subfamily B member 4 OS=Homo sapiens GN=DNAJB4 PE=1 SV=1	Q9UDY4	DnaJ homolog subfamily B member 4	DNJB4_HUMAN	18.4788	18.4349	18.1472
DNAJB6	+	+						+		ATPase activator activity;ATPase regulator activity;binding;chaperone binding;DNA binding;enzyme activator activity;enzyme regulator activity;heat shock protein binding;nucleic acid binding;nucleoside-triphosphatase regulator activity;protein binding;unfolded protein binding	anatomical structure development;biological adhesion;biological regulation;cell adhesion;cell differentiation;cellular component organization;cellular localization;cellular metabolic process;cellular process;cytoskeleton organization;developmental process;extracellular matrix organization;extracellular structure organization;localization;macromolecule metabolic process;metabolic process;organelle…	cell part;cytoplasm;cytosol;intracellular membrane-bounded organelle;intracellular organelle;membrane;nucleoplasm;nucleus;organelle	Alternativesplicing;Chaperone;Completeproteome;Cytoplasm;Directproteinsequencing;Diseasemutation;Limb-girdlemusculardystrophy;Nucleus;Phosphoprotein;Referenceproteome	8	3.08411	0.0105887	-1.37818	-1.19615	1.83998	0.040161	-1.49056	-1.0955	0.110771	0.917616	-0.11238	-0.082194	2.36141	0.424111	1.05922	0.843412	2.38912	0.134308	1.00303	0.857673	3.13834	0.0721929	-1.43437	-1.14643	1.14137	0.44075	-0.375156	-0.324929	>sp|O75190|DNJB6_HUMAN DnaJ homolog subfamily B member 6 OS=Homo sapiens GN=DNAJB6 PE=1 SV=2	O75190	DnaJ homolog subfamily B member 6	DNJB6_HUMAN	15.876	15.6603	15.5499
DNAJC7	+	+						+	+	binding;heat shock protein binding;protein binding	cellular metabolic process;cellular process;macromolecule metabolic process;metabolic process;primary metabolic process;protein folding;protein metabolic process;response to abiotic stimulus;response to heat;response to stimulus;response to stress	cell part;cytoplasm;cytoskeleton;cytosol;extracellular organelle;intracellular non-membrane-bounded organelle;intracellular organelle;membrane;nucleoplasm;organelle;vesicle	Acetylation;Alternativesplicing;Chaperone;Completeproteome;Cytoplasm;Cytoskeleton;Directproteinsequencing;Nucleus;Referenceproteome;Repeat;TPRrepeat	18	2.44533	0.0230334	-1.16178	-0.976706	2.44944	0.0553657	-1.20309	-1.00616	0.123669	0.969648	-0.0413024	-0.0368077	1.53571	0.684954	-0.375038	-0.329813	0.994892	0.502796	-0.39569	-0.333487	4.21431	0.0969527	-1.18244	-1.03826	2.52831	0.00820183	-1.55747	-1.25479	>sp|Q99615|DNJC7_HUMAN DnaJ homolog subfamily C member 7 OS=Homo sapiens GN=DNAJC7 PE=1 SV=2	Q99615	DnaJ homolog subfamily C member 7	DNJC7_HUMAN	16.6192	17.016	17.2034
DNM1	+	+						+	+	binding;catalytic activity;enzyme binding;GTP binding;GTPase activity;guanyl nucleotide binding;guanyl ribonucleotide binding;hydrolase activity;hydrolase activity, acting on acid anhydrides;hydrolase activity, acting on acid anhydrides, in phosphorus-containing anhydrides;identical protein binding;kinase binding;nucleoside-triphosphatase activity;nucleotide binding;protein binding;protein kinase…	biological regulation;cellular component organization;cellular membrane organization;cellular metabolic process;cellular process;endocytosis;endosome organization;establishment of localization;locomotion;macromolecule metabolic process;membrane invagination;membrane organization;metabolic process;organelle organization;response to chemical stimulus;response to external stimulus;response to stimul…	cell part;extracellular organelle;macromolecular complex;membrane;organelle;plasma membrane;protein complex;vesicle	3D-structure;Alternativesplicing;Completeproteome;Cytoplasm;Cytoskeleton;Endocytosis;GTP-binding;Hydrolase;Microtubule;Motorprotein;Nitration;Nucleotide-binding;Phosphoprotein;Polymorphism;Referenceproteome	2	2.96848	0.0101057	1.42447	1.21894	5.00871	0.0200602	1.45299	1.38109	0.0561161	0.982874	0.0285219	0.0242633	0.167019	0.946328	-0.0530027	-0.0471757	0.0751023	0.95444	-0.0387417	-0.0327973	5.30341	0.0494573	1.43873	1.28966	4.44121	0.00792715	1.38572	1.29632	>sp|Q05193|DYN1_HUMAN Dynamin-1 OS=Homo sapiens GN=DNM1 PE=1 SV=2	Q05193	Dynamin-1	DYN1_HUMAN	15.8045	15.8465	15.8124
DNMT1	+	+						+	+	binding;catalytic activity;cation binding;chromatin binding;DNA (cytosine-5-)-methyltransferase activity;DNA binding;DNA-methyltransferase activity;ion binding;metal ion binding;methyl-CpG binding;methyltransferase activity;nucleic acid binding;nucleotide binding;RNA binding;S-adenosylmethionine-dependent methyltransferase activity;sequence-specific DNA binding;transferase activity;transferase ac…	biological regulation;biosynthetic process;cellular component organization;cellular metabolic process;cellular nitrogen compound metabolic process;cellular process;chromatin modification;chromatin organization;chromosome organization;DNA metabolic process;DNA modification;gene silencing;macromolecule metabolic process;macromolecule modification;metabolic process;nitrogen compound metabolic proces…	cell part;intracellular membrane-bounded organelle;intracellular organelle;nucleoplasm;nucleus;organelle	3D-structure;Acetylation;Activator;Alternativesplicing;Chromatinregulator;Completeproteome;Deafness;Diseasemutation;DNA-binding;Metal-binding;Methylation;Methyltransferase;Neuropathy;Nucleus;Phosphoprotein;Polymorphism;Referenceproteome;Repeat;Repressor;S-adenosyl-L-methionine;Transcription;Transcriptionregulation;Transferase;Ublconjugation;Zinc;Zinc-finger	28	3.69983	0.00473733	1.82648	1.60208	2.80535	0.0152649	1.86182	1.49756	0.0599989	0.976732	0.0353374	0.029347	0.200993	0.885261	0.147898	0.114361	0.154934	0.820775	0.165567	0.118288	5.05998	0.0323858	1.84415	1.58831	2.04128	0.00680328	1.99204	1.40185	>sp|P26358|DNMT1_HUMAN DNA (cytosine-5)-methyltransferase 1 OS=Homo sapiens GN=DNMT1 PE=1 SV=2	P26358	DNA (cytosine-5)-methyltransferase 1	DNMT1_HUMAN	19.8233	19.6249	20.0949
DNMT3A	+	+				+		+		binding;catalytic activity;cation binding;chromatin binding;DNA (cytosine-5-)-methyltransferase activity;DNA (cytosine-5-)-methyltransferase activity, acting on CpG substrates;DNA binding;DNA-methyltransferase activity;identical protein binding;ion binding;metal ion binding;methyltransferase activity;nucleic acid binding;protein binding;S-adenosylmethionine-dependent methyltransferase activity;se…	amine metabolic process;biological regulation;cellular amino acid metabolic process;cellular aromatic compound metabolic process;cellular component organization;cellular ketone metabolic process;cellular metabolic process;cellular nitrogen compound metabolic process;cellular process;chromatin modification;chromatin organization;chromosome organization;DNA metabolic process;DNA modification;gene s…	cell part;chromosome;cytoplasm;intracellular membrane-bounded organelle;intracellular non-membrane-bounded organelle;intracellular organelle;nucleoplasm;nucleus;organelle	3D-structure;Alternativepromoterusage;Alternativesplicing;Chromatinregulator;Completeproteome;Cytoplasm;Diseasemutation;DNA-binding;Mentalretardation;Metal-binding;Methyltransferase;Nucleus;Phosphoprotein;Polymorphism;Referenceproteome;Repressor;S-adenosyl-L-methionine;Transferase;Ublconjugation;Zinc;Zinc-finger	18	2.12879	0.0117022	-1.50684	-1.15846	1.95385	0.0259803	-1.74359	-1.25389	0.394424	0.78572	-0.236749	-0.188867	3.66275	0.324389	1.36484	1.14133	3.44795	0.0579286	1.24646	1.12207	3.29321	0.0503472	-1.62521	-1.28168	0.339445	0.679515	-0.260376	-0.197692	>sp|Q9Y6K1|DNM3A_HUMAN DNA (cytosine-5)-methyltransferase 3A OS=Homo sapiens GN=DNMT3A PE=1 SV=4	Q9Y6K1	DNA (cytosine-5)-methyltransferase 3A	DNM3A_HUMAN	16.9633	17.1391	16.1676
DNMT3B	+	+		+	iPSC_NSC	+		+		binding;catalytic activity;cation binding;DNA (cytosine-5-)-methyltransferase activity;DNA (cytosine-5-)-methyltransferase activity, acting on CpG substrates;DNA binding;DNA-methyltransferase activity;ion binding;metal ion binding;methyltransferase activity;nucleic acid binding;protein binding transcription factor activity;S-adenosylmethionine-dependent methyltransferase activity;sequence-specifi…	amine metabolic process;biological regulation;cellular amino acid metabolic process;cellular aromatic compound metabolic process;cellular component organization;cellular ketone metabolic process;cellular metabolic process;cellular nitrogen compound metabolic process;cellular process;chromatin modification;chromatin organization;chromosome organization;DNA metabolic process;DNA modification;gene s…	cell part;cytoplasm;intracellular membrane-bounded organelle;intracellular organelle;nucleoplasm;nucleus;organelle	3D-structure;Activator;Alternativesplicing;Citrullination;Completeproteome;Diseasemutation;DNA-binding;Metal-binding;Methyltransferase;Nucleus;Phosphoprotein;Polymorphism;Referenceproteome;Repressor;S-adenosyl-L-methionine;Transferase;Ublconjugation;Zinc;Zinc-finger	22	4.55429	0.00344444	-3.20407	-2.78776	3.0506	0.00486486	-3.55364	-2.53765	0.34235	0.729383	-0.349569	-0.245726	4.74893	0.0692308	3.14844	2.41026	4.16991	0.0237333	2.97366	2.53451	5.00453	0.0418065	-3.37885	-2.59749	0.998089	0.659357	-0.230412	-0.207901	>sp|Q9UBC3|DNM3B_HUMAN DNA (cytosine-5)-methyltransferase 3B OS=Homo sapiens GN=DNMT3B PE=1 SV=1	Q9UBC3	DNA (cytosine-5)-methyltransferase 3B	DNM3B_HUMAN	16.6209	16.6208	16.4866
DNTTIP2	+	+						+	+		biological regulation;biosynthetic process;cellular metabolic process;cellular nitrogen compound metabolic process;cellular process;macromolecule metabolic process;metabolic process;nitrogen compound metabolic process;nucleobase-containing compound metabolic process;primary metabolic process;RNA metabolic process	cell part;intracellular membrane-bounded organelle;intracellular non-membrane-bounded organelle;intracellular organelle;nucleolus;nucleus;organelle	Coiledcoil;Completeproteome;Nucleus;Phosphoprotein;Polymorphism;Referenceproteome;Transcription;Transcriptionregulation	12	2.55804	0.0136932	-1.35466	-1.12329	2.18582	0.0470062	-1.32836	-1.05805	0.0322107	0.985239	0.0262934	0.0206168	0.183928	0.914927	-0.0976067	-0.0807303	0.136077	0.903049	-0.0844599	-0.0687197	3.58014	0.077808	-1.34151	-1.11933	2.66577	0.00961737	-1.43912	-1.19453	>sp|Q5QJE6|TDIF2_HUMAN Deoxynucleotidyltransferase terminal-interacting protein 2 OS=Homo sapiens GN=DNTTIP2 PE=1 SV=2	Q5QJE6	Deoxynucleotidyltransferase terminal-interacting protein 2	TDIF2_HUMAN	16.2358	15.8496	16.2205
DOCK1	+	+						+	+	enzyme activator activity;enzyme regulator activity;GTPase activator activity;GTPase regulator activity;guanyl-nucleotide exchange factor activity;nucleoside-triphosphatase regulator activity	biological regulation;cell death;cell differentiation;cell motility;cellular component movement;cellular component organization;cellular membrane organization;cellular process;coagulation;death;developmental process;immune system process;locomotion;membrane invagination;membrane organization;multicellular organismal process;regulation of body fluid levels;response to chemical stimulus;response to…	cell part;cytoplasm;cytosol;intracellular membrane-bounded organelle;intracellular organelle;membrane;nucleoplasm;nucleus;organelle	3D-structure;Apoptosis;Completeproteome;Cytoplasm;Guanine-nucleotidereleasingfactor;Membrane;Phagocytosis;Phosphoprotein;Polymorphism;Referenceproteome;SH3-binding;SH3domain	3	2.43874	0.00840331	1.69274	1.32531	2.65996	0.00914474	2.51696	1.85154	0.89481	0.391649	0.824219	0.576584	0.269298	0.797389	-0.273689	-0.192383	0.143207	0.849149	0.13842	0.101889	2.95952	0.0339512	2.10485	1.50826	2.60386	0.00628821	1.83116	1.44112	>sp|Q14185|DOCK1_HUMAN Dedicator of cytokinesis protein 1 OS=Homo sapiens GN=DOCK1 PE=1 SV=2	Q14185	Dedicator of cytokinesis protein 1	DOCK1_HUMAN	15.0801	14.7373	15.0029
DPF2	+	+						+	+	binding;cation binding;core promoter proximal region DNA binding;core promoter proximal region sequence-specific DNA binding;DNA binding;ion binding;metal ion binding;nucleic acid binding;regulatory region DNA binding;regulatory region nucleic acid binding;RNA polymerase II core promoter proximal region sequence-specific DNA binding;RNA polymerase II regulatory region DNA binding;RNA polymerase I…	biological regulation;biosynthetic process;cell death;cellular metabolic process;cellular nitrogen compound metabolic process;cellular process;death;macromolecule metabolic process;metabolic process;nitrogen compound metabolic process;nucleobase-containing compound metabolic process;primary metabolic process;RNA metabolic process	cell part;centrosome;cytoplasm;intracellular membrane-bounded organelle;intracellular non-membrane-bounded organelle;intracellular organelle;microtubule organizing center;nucleoplasm;organelle	3D-structure;Acetylation;Alternativesplicing;Apoptosis;Completeproteome;Cytoplasm;Metal-binding;Nucleus;Phosphoprotein;Referenceproteome;Repeat;Transcription;Transcriptionregulation;Zinc;Zinc-finger	8	4.43184	0.0027715	-1.80731	-1.65742	2.29824	0.0427498	-1.33012	-1.07437	0.942414	0.579728	0.477194	0.385814	0.634146	0.66703	-0.492433	-0.357747	0.208818	0.725223	-0.253836	-0.172602	3.67209	0.0502927	-1.56871	-1.28131	1.92326	0.00678937	-2.06115	-1.40095	>sp|Q92785|REQU_HUMAN Zinc finger protein ubi-d4 OS=Homo sapiens GN=DPF2 PE=1 SV=2	Q92785	Zinc finger protein ubi-d4	REQU_HUMAN	17.109	16.8821	16.9684
DPPA4	+	+		+	iPSC_NSC	+		+			anatomical structure development;biological regulation;biosynthetic process;cellular metabolic process;cellular nitrogen compound metabolic process;cellular process;developmental process;macromolecule metabolic process;metabolic process;nitrogen compound metabolic process;nucleobase-containing compound metabolic process;primary metabolic process;RNA metabolic process	cell part;intracellular membrane-bounded organelle;intracellular organelle;nucleus;organelle	Completeproteome;Developmentalprotein;Nucleus;Phosphoprotein;Polymorphism;Referenceproteome;Transcription;Transcriptionregulation	6	4.00161	0.0062	-3.90438	-3.12114	3.48442	0.00722581	-3.87471	-2.89744	0.0334203	0.983943	0.0296733	0.022828	5.96179	0.076	3.83015	3.07378	3.87614	0	3.84499	3.0373	6.09104	0.0458182	-3.88955	-3.13866	0.0673976	0.933361	-0.0593948	-0.045426	>sp|Q7L190|DPPA4_HUMAN Developmental pluripotency-associated protein 4 OS=Homo sapiens GN=DPPA4 PE=1 SV=2	Q7L190	Developmental pluripotency-associated protein 4	DPPA4_HUMAN	14.6413	14.1681	14.8767
DPY30	+	+						+	+	binding;identical protein binding;protein binding;protein dimerization activity;protein homodimerization activity	biological regulation;biosynthetic process;cellular component organization;cellular metabolic process;cellular nitrogen compound metabolic process;cellular process;chromatin modification;chromatin organization;chromosome organization;endosome transport;establishment of localization;histone modification;macromolecule metabolic process;macromolecule modification;metabolic process;nitrogen compound …	cell part;chromatin remodeling complex;Golgi apparatus;histone methyltransferase complex;intracellular membrane-bounded organelle;intracellular organelle;macromolecular complex;nucleoplasm;nucleus;organelle;protein complex	3D-structure;Acetylation;Chromatinregulator;Completeproteome;Golgiapparatus;Nucleus;Phosphoprotein;Referenceproteome;Transcription;Transcriptionregulation	3	3.59277	0.00496524	-1.76093	-1.53954	1.96585	0.0398142	-1.45778	-1.10112	0.427119	0.742545	0.30315	0.232615	1.04779	0.612748	0.577848	0.446759	1.14454	0.28993	0.729424	0.56122	3.58578	0.0480614	-1.60936	-1.30036	1.4899	0.0635354	-1.03151	-0.781076	>sp|Q9C005|DPY30_HUMAN Protein dpy-30 homolog OS=Homo sapiens GN=DPY30 PE=1 SV=1	Q9C005	Protein dpy-30 homolog	DPY30_HUMAN	16.2901	16.0739	15.8408
DPYSL3	+	+				+		+		binding;carbohydrate binding;catalytic activity;chondroitin sulfate binding;glycosaminoglycan binding;hydrolase activity;hydrolase activity, acting on carbon-nitrogen (but not peptide) bonds;pattern binding;polysaccharide binding;protein binding;protein domain specific binding;SH3 domain binding	biological regulation;cellular component assembly;cellular component organization;cellular process;cytoskeleton organization;locomotion;macromolecular complex assembly;organelle organization;protein complex assembly;response to chemical stimulus;response to external stimulus;response to stimulus;response to stress	cell body;cell part;cell projection;cytoplasmic membrane-bounded vesicle;cytosol;extracellular space;intracellular membrane-bounded organelle;intracellular organelle;macromolecular complex;organelle;protein complex;site of polarized growth;vesicle	3D-structure;Alternativesplicing;Cellprojection;Completeproteome;Cytoplasm;Directproteinsequencing;Nitration;Phosphoprotein;Polymorphism;Referenceproteome	22	2.5623	0.00845763	-1.66945	-1.33218	2.44069	0.027006	-1.56003	-1.24287	0.116296	0.918522	0.109421	0.0815314	3.51225	0.243486	1.67451	1.33519	2.35888	0.030965	1.72922	1.33242	3.65356	0.0463463	-1.61474	-1.31016	0.112994	0.92537	0.0597668	0.0501479	>sp|Q14195|DPYL3_HUMAN Dihydropyrimidinase-related protein 3 OS=Homo sapiens GN=DPYSL3 PE=1 SV=1	Q14195	Dihydropyrimidinase-related protein 3	DPYL3_HUMAN	21.2526	20.9849	21.0844
DSCC1	+	+						+	+	binding;DNA binding;nucleic acid binding	biological regulation;biosynthetic process;cellular metabolic process;cellular nitrogen compound metabolic process;cellular process;DNA metabolic process;DNA replication;macromolecule metabolic process;macromolecule modification;metabolic process;nitrogen compound metabolic process;nucleobase-containing compound metabolic process;primary metabolic process;protein acylation;protein metabolic proce…	cell part;macromolecular complex;nucleoplasm;protein complex	Cellcycle;Completeproteome;DNA-binding;DNAreplication;Nucleus;Polymorphism;Referenceproteome	2	1.10851	0.0202327	-1.76341	-1.00878	1.54437	0.0131111	-3.08296	-1.60562	1.1101	0.187668	-1.31956	-0.846423	0.176055	0.823027	0.275462	0.170782	0.437893	0.568098	-0.384315	-0.27924	1.85398	0.0390429	-2.42318	-1.38874	1.2273	0.0106296	-2.14772	-1.17875	>sp|Q9BVC3|DCC1_HUMAN Sister chromatid cohesion protein DCC1 OS=Homo sapiens GN=DSCC1 PE=1 SV=2	Q9BVC3	Sister chromatid cohesion protein DCC1	DCC1_HUMAN	13.5748	13.6664	11.4035
DSTN	+	+						+	+		biological regulation;cellular component disassembly;cellular component organization;cellular process;cytoskeleton organization;organelle organization;protein depolymerization;regulation of organelle organization	cell part;cytoskeleton;extracellular organelle;intracellular non-membrane-bounded organelle;intracellular organelle;organelle;vesicle	Acetylation;Actin-binding;Alternativesplicing;Completeproteome;Directproteinsequencing;Phosphoprotein;Polymorphism;Referenceproteome;Ublconjugation	11	3.68574	0.00626812	1.66893	1.47818	4.43712	0.014764	1.65002	1.52453	0.044514	0.989402	-0.0189114	-0.0165153	3.71355	0.359389	1.14474	0.985829	2.07662	0.111917	1.13528	0.919687	6.21748	0.0342479	1.65948	1.51161	3.80912	0.00136709	2.80422	2.33355	>sp|P60981|DEST_HUMAN Destrin OS=Homo sapiens GN=DSTN PE=1 SV=3	P60981	Destrin	DEST_HUMAN	21.2308	21.224	21.3308
EBNA1BP2	+	+						+	+		cellular process;ribosome biogenesis	cell part;intracellular membrane-bounded organelle;intracellular non-membrane-bounded organelle;intracellular organelle;membrane;nucleolus;nucleus;organelle	Acetylation;Coiledcoil;Completeproteome;Nucleus;Phosphoprotein;Polymorphism;Referenceproteome;Ribosomebiogenesis	8	3.1025	0.0154088	-1.23309	-1.08674	2.92084	0.0289721	-1.42735	-1.21593	0.384526	0.823246	-0.194253	-0.160196	0.595433	0.771612	0.258694	0.214133	0.255922	0.803344	0.161568	0.129157	4.23225	0.0707738	-1.33022	-1.15149	2.09158	0.0426889	-1.07153	-0.878947	>sp|Q99848|EBP2_HUMAN Probable rRNA-processing protein EBP2 OS=Homo sapiens GN=EBNA1BP2 PE=1 SV=2	Q99848	Probable rRNA-processing protein EBP2	EBP2_HUMAN	17.0732	16.9474	16.9613
ECH1	+	+						+	+	binding;catalytic activity;isomerase activity;protein binding;receptor binding	catabolic process;cellular ketone metabolic process;cellular lipid metabolic process;cellular metabolic process;cellular process;lipid metabolic process;metabolic process;organic acid metabolic process;primary metabolic process;small molecule metabolic process	cell part;extracellular organelle;intracellular membrane-bounded organelle;intracellular organelle;membrane;microbody;mitochondrion;organelle;peroxisome;vesicle	3D-structure;Acetylation;Completeproteome;Directproteinsequencing;Fattyacidmetabolism;Isomerase;Lipidmetabolism;Mitochondrion;Peroxisome;Phosphoprotein;Polymorphism;Referenceproteome;Transitpeptide	13	3.08518	0.00493213	-1.93586	-1.5951	3.22061	0.0375627	-1.26119	-1.11771	1.31717	0.413057	0.674671	0.544154	0.0895174	0.934993	0.0822795	0.0615728	0.496786	0.534605	0.419615	0.306588	3.20474	0.0536674	-1.59852	-1.25593	2.10169	0.0109949	-1.51624	-1.15921	>sp|Q13011|ECH1_HUMAN Delta(3,5)-Delta(2,4)-dienoyl-CoA isomerase, mitochondrial OS=Homo sapiens GN=ECH1 PE=1 SV=2	Q13011	Delta(3,5)-Delta(2,4)-dienoyl-CoA isomerase, mitochondrial	ECH1_HUMAN	17.6419	17.7718	17.7962
EFHD2	+	+						+	+	binding;calcium ion binding;cation binding;ion binding;metal ion binding		cell part	Acetylation;Calcium;Completeproteome;Directproteinsequencing;Membrane;Metal-binding;Phosphoprotein;Referenceproteome;Repeat	6	4.29122	0.00267153	2.12789	1.9075	2.77062	0.0109297	2.27174	1.74329	0.167505	0.886615	0.143848	0.108651	1.89153	0.514144	-0.85323	-0.678613	1.50591	0.24351	-0.781306	-0.630111	4.7037	0.0274016	2.19981	1.807	2.50962	0.0142763	1.34658	1.11196	>sp|Q96C19|EFHD2_HUMAN EF-hand domain-containing protein D2 OS=Homo sapiens GN=EFHD2 PE=1 SV=1	Q96C19	EF-hand domain-containing protein D2	EFHD2_HUMAN	19.1034	19.0689	19.0655
EFTUD2	+	+						+	+	binding;catalytic activity;GTP binding;GTPase activity;guanyl nucleotide binding;guanyl ribonucleotide binding;hydrolase activity;hydrolase activity, acting on acid anhydrides;hydrolase activity, acting on acid anhydrides, in phosphorus-containing anhydrides;nucleoside-triphosphatase activity;nucleotide binding;purine nucleotide binding;purine ribonucleoside triphosphate binding;purine ribonucleo…	cellular metabolic process;cellular nitrogen compound metabolic process;cellular process;macromolecule metabolic process;metabolic process;mRNA metabolic process;mRNA processing;nitrogen compound metabolic process;nucleobase-containing compound metabolic process;primary metabolic process;RNA metabolic process;RNA processing;RNA splicing	cell part;cytoplasm;macromolecular complex;membrane;nucleoplasm;ribonucleoprotein complex;spliceosomal complex	Acetylation;Alternativesplicing;Completeproteome;Diseasemutation;GTP-binding;Mentalretardation;mRNAprocessing;mRNAsplicing;Nucleotide-binding;Nucleus;Phosphoprotein;Polymorphism;Referenceproteome;Spliceosome	46	4.46092	0.016492	-1.13347	-1.0736	2.55147	0.0185678	-1.79098	-1.40642	1.12367	0.445438	-0.657508	-0.515619	0.00976339	0.99165	-0.00899855	-0.00686058	0.730717	0.5687	-0.337753	-0.278735	2.89951	0.0727253	-1.46222	-1.14104	2.66475	0.00896901	-1.47122	-1.21644	>sp|Q15029|U5S1_HUMAN 116 kDa U5 small nuclear ribonucleoprotein component OS=Homo sapiens GN=EFTUD2 PE=1 SV=1	Q15029	116 kDa U5 small nuclear ribonucleoprotein component	U5S1_HUMAN	20.038	20.0643	19.9555
EHD2	+	+						+	+	adenyl nucleotide binding;adenyl ribonucleotide binding;ATP binding;binding;calcium ion binding;catalytic activity;cation binding;GTP binding;guanyl nucleotide binding;guanyl ribonucleotide binding;hydrolase activity;ion binding;metal ion binding;nucleic acid binding;nucleotide binding;purine nucleotide binding;purine ribonucleoside triphosphate binding;purine ribonucleotide binding;ribonucleotid…	biological regulation;cellular component organization;cellular localization;cellular membrane organization;cellular process;coagulation;cytoskeleton organization;endocytosis;endosome transport;establishment of localization;localization;membrane invagination;membrane organization;multicellular organismal process;organelle organization;plasma membrane organization;regulation of body fluid levels;tr…	cell part;extracellular organelle;intracellular membrane-bounded organelle;intracellular organelle;membrane;nucleus;organelle;plasma membrane;vesicle	Acetylation;Alternativesplicing;ATP-binding;Calcium;Cellmembrane;Completeproteome;Directproteinsequencing;Endosome;Hydrolase;Membrane;Metal-binding;Nucleotide-binding;Phosphoprotein;Polymorphism;Referenceproteome	30	5.35443	0.00751515	3.59752	3.25404	2.1518	0.0126594	2.37854	1.62065	1.21018	0.199465	-1.21898	-0.827357	0.605122	0.615432	0.678679	0.441021	0.0813434	0.926572	0.0691897	0.0532024	3.22234	0.0311818	2.98803	1.98352	3.63876	0	3.66671	2.83921	>sp|Q9NZN4|EHD2_HUMAN EH domain-containing protein 2 OS=Homo sapiens GN=EHD2 PE=1 SV=2	Q9NZN4	EH domain-containing protein 2	EHD2_HUMAN	21.9621	21.8428	21.7785
EHD3	+	+						+		adenyl nucleotide binding;adenyl ribonucleotide binding;ATP binding;binding;calcium ion binding;cation binding;GTP binding;guanyl nucleotide binding;guanyl ribonucleotide binding;ion binding;metal ion binding;nucleic acid binding;nucleotide binding;purine nucleotide binding;purine ribonucleoside triphosphate binding;purine ribonucleotide binding;ribonucleotide binding	biological regulation;cellular component assembly;cellular component organization;cellular process;coagulation;endosome transport;establishment of localization;macromolecular complex assembly;multicellular organismal process;protein complex assembly;protein targeting;protein transport;regulation of body fluid levels;transport;vesicle-mediated transport	cell part;cytoplasm;cytoplasmic membrane-bounded vesicle;intracellular membrane-bounded organelle;intracellular organelle;membrane;nucleus;organelle;plasma membrane;vesicle	Acetylation;Alternativesplicing;ATP-binding;Calcium;Cellmembrane;Coiledcoil;Completeproteome;Cytoplasm;Directproteinsequencing;Endosome;Membrane;Metal-binding;Nucleotide-binding;Referenceproteome	8	1.64365	0.035415	1.14431	0.868425	2.83158	0.01706	1.77707	1.44654	0.776944	0.501711	0.632759	0.460066	0.21911	0.696364	-0.709144	-0.307616	0.0702152	0.793706	-0.392765	-0.132832	2.5471	0.0824949	1.46069	1.10205	0.14425	0.566817	0.751546	0.256145	>sp|Q9NZN3|EHD3_HUMAN EH domain-containing protein 3 OS=Homo sapiens GN=EHD3 PE=1 SV=2	Q9NZN3	EH domain-containing protein 3	EHD3_HUMAN	17.8012	17.7635	18.0147
EIF4A3	+	+						+	+	adenyl nucleotide binding;adenyl ribonucleotide binding;ATP binding;ATPase activity;ATPase activity, coupled;ATP-dependent helicase activity;ATP-dependent RNA helicase activity;binding;catalytic activity;helicase activity;hydrolase activity;hydrolase activity, acting on acid anhydrides;hydrolase activity, acting on acid anhydrides, in phosphorus-containing anhydrides;mRNA binding;nucleic acid bin…	anatomical structure morphogenesis;biological regulation;catabolic process;cellular metabolic process;cellular nitrogen compound metabolic process;cellular process;developmental process;establishment of localization;macromolecule metabolic process;metabolic process;mRNA metabolic process;mRNA processing;nitrogen compound metabolic process;nucleobase-containing compound metabolic process;nucleobas…	cell part;cytoplasm;cytosol;intracellular non-membrane-bounded organelle;intracellular organelle;macromolecular complex;membrane;nucleolus;nucleoplasm;organelle;protein complex;ribonucleoprotein complex;spliceosomal complex	3D-structure;Acetylation;ATP-binding;Completeproteome;Cytoplasm;Directproteinsequencing;Diseasemutation;Helicase;Hydrolase;mRNAprocessing;mRNAsplicing;mRNAtransport;Nonsense-mediatedmRNAdecay;Nucleotide-binding;Nucleus;Phosphoprotein;Referenceproteome;RNA-binding;rRNAprocessing;Spliceosome;Translationregulation;Transport	22	6.83591	0.00836864	-1.34633	-1.32406	5.07848	0.0366515	-1.16968	-1.12442	2.0716	0.808862	0.176648	0.170411	2.75803	0.646658	-0.420598	-0.387373	1.68456	0.536057	-0.332274	-0.304953	6.67831	0.0651463	-1.258	-1.18284	4.29123	0.00485333	-1.6786	-1.53839	>sp|P38919|IF4A3_HUMAN Eukaryotic initiation factor 4A-III OS=Homo sapiens GN=EIF4A3 PE=1 SV=4	P38919	Eukaryotic initiation factor 4A-III	IF4A3_HUMAN	19.0619	19.0306	19.0887
ELOVL1	+	+						+	+	catalytic activity;fatty acid elongase activity;fatty acid synthase activity;transferase activity;transferase activity, transferring acyl groups;transferase activity, transferring acyl groups other than amino-acyl groups	biosynthetic process;cellular ketone metabolic process;cellular lipid metabolic process;cellular metabolic process;cellular process;cofactor metabolic process;glycerol ether metabolic process;lipid metabolic process;metabolic process;organic acid metabolic process;primary metabolic process;small molecule metabolic process	cell part;endoplasmic reticulum;intracellular membrane-bounded organelle;intracellular organelle;membrane;organelle	Acetylation;Alternativesplicing;Completeproteome;Endoplasmicreticulum;Fattyacidbiosynthesis;Fattyacidmetabolism;Lipidbiosynthesis;Lipidmetabolism;Membrane;Referenceproteome;Transferase;Transmembrane;Transmembranehelix	2	4.35273	0.00459259	3.54015	2.98628	2.75848	0.0101628	2.35816	1.79055	1.51059	0.175141	-1.18199	-0.868001	0.536791	0.5829	0.887419	0.4996	0.109507	0.76893	0.296424	0.149791	3.47109	0.0339487	2.94916	2.02751	1.78615	0.00443312	3.83657	1.95417	>sp|Q9BW60|ELOV1_HUMAN Elongation of very long chain fatty acids protein 1 OS=Homo sapiens GN=ELOVL1 PE=1 SV=1	Q9BW60	Elongation of very long chain fatty acids protein 1	ELOV1_HUMAN	14.6089	14.7549	14.6354
ELP2	+	+						+	+		biological regulation;biosynthetic process;cellular component organization;cellular metabolic process;cellular nitrogen compound metabolic process;cellular process;chromatin organization;chromosome organization;macromolecule metabolic process;metabolic process;nitrogen compound metabolic process;nucleobase-containing compound metabolic process;organelle organization;primary metabolic process;RNA …	cell part;cytoplasm;macromolecular complex;protein complex;transcription elongation factor complex	Alternativesplicing;Completeproteome;Cytoplasm;Nucleus;Polymorphism;Referenceproteome;Repeat;Transcription;Transcriptionregulation;WDrepeat	6	3.08817	0.0165214	-1.22088	-1.07615	1.30856	0.0148195	-3.36839	-1.52704	0.823928	0.132203	-2.14751	-0.97275	0.680088	0.50642	1.46672	0.71207	1.28426	0.487752	0.392967	0.343659	1.17397	0.0792166	-2.29463	-1.11428	2.54233	0.0752911	-0.827912	-0.73454	>sp|Q6IA86|ELP2_HUMAN Elongator complex protein 2 OS=Homo sapiens GN=ELP2 PE=1 SV=2	Q6IA86	Elongator complex protein 2	ELP2_HUMAN	16.7242	16.6583	16.45
EMC1	+	+						+	+			cell part;macromolecular complex;protein complex	Alternativesplicing;Completeproteome;Glycoprotein;Membrane;Polymorphism;Referenceproteome;Signal;Transmembrane;Transmembranehelix	14	4.15106	0.00315152	2.37161	2.08088	3.94804	0.00905763	2.1319	1.86783	0.534402	0.7753	-0.239709	-0.200132	2.0661	0.588892	-0.567376	-0.490372	1.96365	0.268098	-0.68723	-0.596076	5.82196	0.0290722	2.25176	1.95522	4.87154	0.00433819	1.68438	1.58109	>sp|Q8N766|EMC1_HUMAN ER membrane protein complex subunit 1 OS=Homo sapiens GN=EMC1 PE=1 SV=1	Q8N766	ER membrane protein complex subunit 1	EMC1_HUMAN	20.0444	20.031	20.0786
EML2	+	+				+		+	+	binding;cytoskeletal protein binding;microtubule binding;protein binding;tubulin binding	biological regulation;multicellular organismal process;neurological system process;regulation of organelle organization	cell part;cytoplasm;intracellular non-membrane-bounded organelle;intracellular organelle;macromolecular complex;organelle;protein complex	3D-structure;Alternativesplicing;Completeproteome;Cytoplasm;Cytoskeleton;Microtubule;Polymorphism;Referenceproteome;Repeat;WDrepeat	3	3.54036	0.00225455	3.21073	2.5273	1.2854	0.0622521	1.51685	0.97652	1.296	0.103814	-1.69389	-1.05042	0.76513	0.515593	-1.24138	-0.683787	1.34155	0.0442826	-2.08832	-1.20847	1.97168	0.0382334	2.36379	1.40291	0.760338	0.0953373	1.12241	0.668518	>sp|O95834|EMAL2_HUMAN Echinoderm microtubule-associated protein-like 2 OS=Homo sapiens GN=EML2 PE=1 SV=1	O95834	Echinoderm microtubule-associated protein-like 2	EMAL2_HUMAN	15.6746	15.6193	15.5211
ENG	+	+						+	+	activin binding;binding;carbohydrate binding;catalytic activity;cytokine binding;cytokine receptor binding;galactose binding;glycosaminoglycan binding;growth factor binding;identical protein binding;kinase activity;molecular transducer activity;monosaccharide binding;pattern binding;phosphotransferase activity, alcohol group as acceptor;polysaccharide binding;protein binding;protein complex bindi…	aging;anatomical structure development;anatomical structure morphogenesis;biological adhesion;biological regulation;cell adhesion;cell differentiation;cell motility;cellular component disassembly;cellular component movement;cellular component organization;cellular process;detection of stimulus;developmental process;establishment of localization;extracellular matrix organization;extracellular stru…	cell part;cell surface;cytoplasm;extracellular space;macromolecular complex;nucleoplasm;protein complex;receptor complex	Alternativesplicing;Angiogenesis;Celladhesion;Completeproteome;Directproteinsequencing;Diseasemutation;Glycoprotein;Membrane;Phosphoprotein;Polymorphism;Referenceproteome;Signal;Transmembrane;Transmembranehelix	10	3.41985	0.00482704	1.76471	1.52184	1.34335	0.0644003	1.45444	0.965542	0.238229	0.770795	-0.310274	-0.205099	0.209518	0.856929	0.192372	0.140623	0.060899	0.956409	0.0372346	0.0307196	2.56115	0.0648033	1.60957	1.1866	3.10979	0.00592929	1.80195	1.50672	>sp|P17813|EGLN_HUMAN Endoglin OS=Homo sapiens GN=ENG PE=1 SV=2	P17813	Endoglin	EGLN_HUMAN	18.5051	18.2633	18.1814
ENPP1	+	+						+	+	3'-phosphoadenosine 5'-phosphosulfate binding;adenyl nucleotide binding;adenyl ribonucleotide binding;ATP binding;binding;calcium ion binding;carbohydrate binding;cargo receptor activity;catalytic activity;cation binding;exonuclease activity;hydrolase activity;hydrolase activity, acting on acid anhydrides;hydrolase activity, acting on acid anhydrides, in phosphorus-containing anhydrides;hydrolase…	anatomical structure development;biological regulation;catabolic process;cellular homeostasis;cellular ion homeostasis;cellular metabolic process;cellular nitrogen compound metabolic process;cellular process;developmental process;establishment of localization;generation of precursor metabolites and energy;heterocycle metabolic process;homeostatic process;immune system process;ion transport;locali…	cell part;cell surface;extracellular space;membrane;plasma membrane	3D-structure;Biomineralization;Calcium;Cellmembrane;Completeproteome;Diabetesmellitus;Directproteinsequencing;Diseasemutation;Disulfidebond;Glycoprotein;Hydrolase;Membrane;Metal-binding;Obesity;Polymorphism;Referenceproteome;Repeat;Secreted;Signal-anchor;Transmembrane;Transmembranehelix;Zinc	7	1.54559	0.0113312	1.78781	1.16615	1.61183	0.0411974	1.57673	1.08898	0.110412	0.867513	-0.211086	-0.124765	0.135498	0.86492	0.211278	0.132656	0.0462753	0.917646	0.105735	0.0593476	2.09326	0.0705393	1.68227	1.15255	1.51654	0.00923288	1.89355	1.20078	>sp|P22413|ENPP1_HUMAN Ectonucleotide pyrophosphatase/phosphodiesterase family member 1 OS=Homo sapiens GN=ENPP1 PE=1 SV=2	P22413	Ectonucleotide pyrophosphatase/phosphodiesterase family member 1	ENPP1_HUMAN	16.9202	16.8235	17.0149
EPCAM	+	+				+		+		binding;protein binding;protein complex binding	anatomical structure development;biological regulation;cell differentiation;cellular process;developmental process;response to stimulus;signal transduction	cell part;cell surface;extracellular organelle;membrane;organelle;plasma membrane;vesicle	3D-structure;Celljunction;Cellmembrane;Completeproteome;Directproteinsequencing;Diseasemutation;Disulfidebond;Glycoprotein;Hereditarynonpolyposiscolorectalcancer;Membrane;Polymorphism;Pyrrolidonecarboxylicacid;Referenceproteome;Repeat;Signal;Tightjunction;Transmembrane;Transmembranehelix;Tumorantigen	6	1.88798	0.00835146	-1.92917	-1.32889	2.90507	0.00483544	-3.26739	-2.33081	1.71525	0.125212	-1.33822	-0.989029	2.65683	0.195067	2.34722	1.56563	2.27631	0.0330446	1.67811	1.28635	2.69047	0.029865	-2.59828	-1.68185	0.280748	0.70282	-0.25106	-0.184611	>sp|P16422|EPCAM_HUMAN Epithelial cell adhesion molecule OS=Homo sapiens GN=EPCAM PE=1 SV=2	P16422	Epithelial cell adhesion molecule	EPCAM_HUMAN	17.0212	16.392	15.8195
EPM2AIP1	+	+						+			biological regulation;response to chemical stimulus;response to endogenous stimulus;response to stimulus	cell part;endoplasmic reticulum;intracellular membrane-bounded organelle;intracellular organelle;nucleus;organelle	Completeproteome;Endoplasmicreticulum;Phosphoprotein;Polymorphism;Referenceproteome	2	2.43947	0.0138903	1.36799	1.11768	1.46768	0.0292875	1.95642	1.20885	0.410355	0.60074	0.588433	0.365687	0.925826	0.543321	-0.862076	-0.580589	0.789383	0.395236	-0.567859	-0.426304	2.07772	0.0729214	1.6622	1.14045	1.0783	0.133225	0.800126	0.593207	>sp|Q7L775|EPMIP_HUMAN EPM2A-interacting protein 1 OS=Homo sapiens GN=EPM2AIP1 PE=1 SV=1	Q7L775	EPM2A-interacting protein 1	EPMIP_HUMAN	15.5142	15.1683	14.9085
EPN3		+	+					+		binding;lipid binding		cell part;cytoplasmic membrane-bounded vesicle;extracellular organelle;intracellular membrane-bounded organelle;intracellular organelle;nucleus;organelle;vesicle	Alternativesplicing;Completeproteome;Cytoplasm;Cytoplasmicvesicle;Lipid-binding;Nucleus;Polymorphism;Referenceproteome;Repeat	2	0.213803	0.573302	-0.428344	-0.240917	2.85116	0.01424	-6.46553	-3.54954	2.91169	0.0178462	-6.03718	-3.47066	0.840322	0.324198	3.36417	1.10377	0.223169	0.65694	0.345577	0.21537	0.853006	0.0775747	-3.44694	-1.12175	0.0400554	0.928347	-0.0827672	-0.0486143	>sp|Q9H201|EPN3_HUMAN Epsin-3 OS=Homo sapiens GN=EPN3 PE=2 SV=1	Q9H201	Epsin-3	EPN3_HUMAN	14.1673	12.1605	13.6925
ERAP1	+	+					+	+	+	aminopeptidase activity;binding;catalytic activity;cation binding;cytokine receptor binding;exopeptidase activity;growth factor receptor binding;hydrolase activity;interleukin-1 receptor binding;interleukin-1, Type II receptor binding;interleukin-6 receptor binding;ion binding;metal ion binding;metalloexopeptidase activity;metallopeptidase activity;peptidase activity;peptidase activity, acting on…	anatomical structure formation involved in morphogenesis;biological regulation;cell differentiation;cellular process;developmental process;immune system process;macromolecule metabolic process;metabolic process;multi-organism process;primary metabolic process;protein metabolic process;proteolysis;response to biotic stimulus;response to stimulus	cell part;cytosol;endoplasmic reticulum;extracellular organelle;extracellular region;extracellular space;intracellular membrane-bounded organelle;intracellular organelle;membrane;organelle;vesicle	3D-structure;Adaptiveimmunity;Alternativesplicing;Aminopeptidase;Completeproteome;Directproteinsequencing;Disulfidebond;Endoplasmicreticulum;Glycoprotein;Hydrolase;Immunity;Membrane;Metal-binding;Metalloprotease;Polymorphism;Protease;Referenceproteome;Signal-anchor;Transmembrane;Transmembranehelix;Zinc	9	2.68434	0.00989425	1.48808	1.23051	1.82815	0.0422878	1.46297	1.07823	0.0211256	0.987189	-0.0251067	-0.0179814	1.04135	0.614075	-0.583272	-0.449466	0.948691	0.365191	-0.595826	-0.460495	3.07081	0.0684981	1.47552	1.16614	1.69941	0.0786095	0.89225	0.720688	>sp|Q9NZ08|ERAP1_HUMAN Endoplasmic reticulum aminopeptidase 1 OS=Homo sapiens GN=ERAP1 PE=1 SV=3	Q9NZ08	Endoplasmic reticulum aminopeptidase 1	ERAP1_HUMAN	16.8998	16.7583	16.6088
ERBB2	+	+				+		+		adenyl nucleotide binding;adenyl ribonucleotide binding;ATP binding;binding;catalytic activity;enzyme binding;ErbB-3 class receptor binding;identical protein binding;kinase activity;molecular transducer activity;nucleotide binding;phosphatase binding;phosphotransferase activity, alcohol group as acceptor;protein binding;protein C-terminus binding;protein dimerization activity;protein heterodimeri…	anatomical structure development;biological regulation;biosynthetic process;cell differentiation;cell proliferation;cellular component organization;cellular metabolic process;cellular nitrogen compound metabolic process;cellular process;developmental process;immune system process;locomotion;macromolecule metabolic process;macromolecule modification;metabolic process;nitrogen compound metabolic pr…	cell part;cytoplasm;intracellular membrane-bounded organelle;intracellular organelle;macromolecular complex;membrane;nucleus;organelle;plasma membrane;protein complex;receptor complex;vesicle	3D-structure;Activator;Alternativeinitiation;Alternativesplicing;ATP-binding;Cellmembrane;Chromosomalrearrangement;Completeproteome;Cytoplasm;Disulfidebond;Glycoprotein;Kinase;Membrane;Nucleotide-binding;Nucleus;Phosphoprotein;Polymorphism;Receptor;Referenceproteome;Signal;Transcription;Transcriptionregulation;Transferase;Transmembrane;Transmembranehelix;Tyrosine-proteinkinase	2	2.63895	0.00258333	-4.13379	-2.58699	1.80108	0.00575862	-6.72966	-2.5183	0.737652	0.122992	-2.59587	-0.993214	1.52727	0.177447	4.35692	1.67517	1.07969	0.0316986	3.05898	1.31182	2.22025	0.0411429	-5.43173	-2.26463	0.313213	0.265196	-1.07481	-0.447386	>sp|P04626|ERBB2_HUMAN Receptor tyrosine-protein kinase erbB-2 OS=Homo sapiens GN=ERBB2 PE=1 SV=1	P04626	Receptor tyrosine-protein kinase erbB-2	ERBB2_HUMAN	7.63662	8.58496	9.45327
ERBIN	+	+						+	+	binding;ErbB-2 class receptor binding;integrin binding;protein binding;protein complex binding;receptor binding;structural constituent of cytoskeleton;structural molecule activity	biological adhesion;biological regulation;cell adhesion;cell cycle;cell growth;cellular component organization;cellular process;cytoskeleton organization;establishment of localization;establishment or maintenance of cell polarity;growth;localization;organelle organization;protein targeting;protein transport;response to stimulus;signal transduction;transport	cell part;cytoplasm;intracellular membrane-bounded organelle;intracellular organelle;membrane;nucleoplasm;nucleus;organelle;plasma membrane	3D-structure;Alternativesplicing;Celljunction;Cellmembrane;Completeproteome;Leucine-richrepeat;Membrane;Nucleus;Phosphoprotein;Polymorphism;Referenceproteome;Repeat	5	2.26567	0.00999085	1.58393	1.22841	2.59886	0.0233132	1.59816	1.29203	0.0130445	0.99207	0.0142352	0.0104616	0.173681	0.89112	-0.139361	-0.106074	0.113563	0.864979	-0.132244	-0.0929676	3.52204	0.0505946	1.59104	1.2825	1.96244	0.0157752	1.45168	1.09702	>sp|Q96RT1|ERBIN_HUMAN Erbin OS=Homo sapiens GN=ERBIN PE=1 SV=2	Q96RT1	Erbin	ERBIN_HUMAN	16.5106	16.3912	16.2682
ERLIN1	+							+	+		catabolic process;cellular metabolic process;cellular process;macromolecule metabolic process;metabolic process;primary metabolic process;protein metabolic process;proteolysis;proteolysis involved in cellular protein catabolic process	cell part;endoplasmic reticulum;intracellular membrane-bounded organelle;intracellular organelle;macromolecular complex;membrane;organelle;protein complex	Acetylation;Completeproteome;Directproteinsequencing;Endoplasmicreticulum;Glycoprotein;Membrane;Referenceproteome;Signal-anchor;Transmembrane;Transmembranehelix	7	2.96623	0.00741869	1.7543	1.45232	1.15887	0.128711	1.08808	0.754812	0.6697	0.502371	-0.666225	-0.459047	0.281002	0.798092	-0.269055	-0.192067	0.960103	0.36192	-0.602168	-0.465476	2.15496	0.097365	1.42119	1.03198	1.84199	0.037988	1.15213	0.90126	>sp|O75477|ERLN1_HUMAN Erlin-1 OS=Homo sapiens GN=ERLIN1 PE=1 SV=1	O75477	Erlin-1	ERLN1_HUMAN	18.1901	18.3865	17.933
ESD	+	+				+		+		carboxylic ester hydrolase activity;catalytic activity;deacetylase activity;hydrolase activity;hydrolase activity, acting on ester bonds;methylumbelliferyl-acetate deacetylase activity;S-formylglutathione hydrolase activity;thiolester hydrolase activity	catabolic process;cellular aldehyde metabolic process;cellular metabolic process;cellular process;metabolic process;small molecule metabolic process	cell part;cytoplasm;cytoplasmic membrane-bounded vesicle;extracellular organelle;Golgi apparatus;intracellular membrane-bounded organelle;intracellular organelle;membrane;nucleoplasm;organelle;plasma membrane;vesicle	3D-structure;Acetylation;Completeproteome;Cytoplasm;Cytoplasmicvesicle;Directproteinsequencing;Hydrolase;Polymorphism;Referenceproteome;Serineesterase	12	4.60061	0.00860345	1.42443	1.33796	2.49591	0.0750698	1.07365	0.91791	0.919584	0.67317	-0.350775	-0.297729	3.49793	0.349978	-1.19726	-1.01232	3.24619	0.0440432	-1.37265	-1.20662	3.89664	0.089643	1.24904	1.07263	0.153026	0.933231	0.0517839	0.0459729	>sp|P10768|ESTD_HUMAN S-formylglutathione hydrolase OS=Homo sapiens GN=ESD PE=1 SV=2	P10768	S-formylglutathione hydrolase	ESTD_HUMAN	19.9888	20.0374	20.0742
ESF1	+	+						+	+		biological regulation;biosynthetic process;cellular metabolic process;cellular nitrogen compound metabolic process;cellular process;macromolecule metabolic process;metabolic process;nitrogen compound metabolic process;nucleobase-containing compound metabolic process;primary metabolic process;RNA metabolic process	cell part;extracellular space;intracellular non-membrane-bounded organelle;intracellular organelle;nucleolus;nucleoplasm;organelle	Acetylation;Coiledcoil;Completeproteome;Nucleus;Phosphoprotein;Polymorphism;Referenceproteome;Transcription;Transcriptionregulation	11	3.31617	0.00839832	-1.52579	-1.33057	3.16455	0.0543035	-1.13215	-1.01162	1.14775	0.632472	0.393635	0.338965	0.148411	0.924952	-0.0878944	-0.0716128	0.150836	0.878103	0.108923	0.085812	3.93267	0.0741935	-1.32897	-1.13324	2.34341	0.0122752	-1.41687	-1.13676	>sp|Q9H501|ESF1_HUMAN ESF1 homolog OS=Homo sapiens GN=ESF1 PE=1 SV=1	Q9H501	ESF1 homolog	ESF1_HUMAN	15.2646	15.5011	15.4245
ETHE1	+	+						+	+	binding;catalytic activity;cation binding;dioxygenase activity;ion binding;iron ion binding;metal ion binding;oxidoreductase activity;oxidoreductase activity, acting on single donors with incorporation of molecular oxygen;oxidoreductase activity, acting on single donors with incorporation of molecular oxygen, incorporation of two atoms of oxygen;sulfur dioxygenase activity;transition metal ion bi…	amine metabolic process;catabolic process;cellular amino acid metabolic process;cellular ketone metabolic process;cellular metabolic process;cellular nitrogen compound metabolic process;cellular process;metabolic process;nitrogen compound metabolic process;organic acid metabolic process;peptide metabolic process;primary metabolic process;small molecule metabolic process;sulfur compound metabolic …	cell part;cytoplasm;intracellular membrane-bounded organelle;intracellular organelle;mitochondrion;nucleoplasm;organelle	3D-structure;Acetylation;Completeproteome;Cytoplasm;Dioxygenase;Diseasemutation;Metal-binding;Mitochondrion;Nucleus;Oxidoreductase;Phosphoprotein;Referenceproteome;Transitpeptide	7	2.7826	0.00851578	1.60469	1.32339	1.8202	0.0551238	1.33962	1.00835	0.27192	0.783253	-0.265071	-0.190609	0.332997	0.815693	0.228074	0.17614	0.125584	0.893753	0.0955385	0.0747234	3.01822	0.0696947	1.47216	1.15894	3.14123	0.00624729	1.70023	1.43912	>sp|O95571|ETHE1_HUMAN Persulfide dioxygenase ETHE1, mitochondrial OS=Homo sapiens GN=ETHE1 PE=1 SV=2	O95571	Persulfide dioxygenase ETHE1, mitochondrial	ETHE1_HUMAN	17.8848	17.9285	17.9359
EXOSC1	+							+	+	binding;nucleic acid binding;RNA binding	catabolic process;cellular metabolic process;cellular nitrogen compound metabolic process;cellular process;macromolecule metabolic process;metabolic process;mRNA metabolic process;nitrogen compound metabolic process;nucleobase-containing compound metabolic process;primary metabolic process;RNA catabolic process;RNA metabolic process;RNA processing;rRNA processing	cell part;cytoplasm;cytosol;exosome (RNase complex);intracellular membrane-bounded organelle;intracellular non-membrane-bounded organelle;intracellular organelle;macromolecular complex;nucleolus;nucleoplasm;nucleus;organelle;protein complex	3D-structure;Completeproteome;Cytoplasm;Exosome;Nucleus;Phosphoprotein;Referenceproteome;RNA-binding;rRNAprocessing	5	2.07372	0.0112017	-1.55158	-1.17456	1.45338	0.101327	-1.12669	-0.828424	1.08354	0.61022	0.424898	0.35876	0.122553	0.935888	-0.0709397	-0.0582538	0.307269	0.819905	0.141509	0.119145	2.72746	0.0963473	-1.33914	-1.04902	1.75511	0.0209738	-1.41007	-1.03548	>sp|Q9Y3B2|EXOS1_HUMAN Exosome complex component CSL4 OS=Homo sapiens GN=EXOSC1 PE=1 SV=1	Q9Y3B2	Exosome complex component CSL4	EXOS1_HUMAN	15.1348	16.1192	15.218
EXOSC10	+	+	+					+	+	3'-5' exonuclease activity;binding;catalytic activity;exonuclease activity;exoribonuclease activity;hydrolase activity;hydrolase activity, acting on ester bonds;nuclease activity;nucleotide binding;ribonuclease activity	biological regulation;catabolic process;cellular localization;cellular metabolic process;cellular nitrogen compound metabolic process;cellular process;localization;macromolecule metabolic process;metabolic process;mRNA metabolic process;nitrogen compound metabolic process;nucleobase-containing compound metabolic process;primary metabolic process;regulation of gene expression, epigenetic;RNA catab…	cell part;cytoplasm;exosome (RNase complex);intracellular membrane-bounded organelle;intracellular non-membrane-bounded organelle;intracellular organelle;macromolecular complex;membrane;nucleolus;nucleoplasm;nucleus;organelle;protein complex	3D-structure;Alternativesplicing;Completeproteome;Cytoplasm;Exonuclease;Exosome;Hydrolase;Nonsense-mediatedmRNAdecay;Nuclease;Nucleus;Referenceproteome;RNA-binding;rRNAprocessing	17	2.3132	0.0912173	-0.690217	-0.614972	2.42566	0.00772139	-3.27172	-2.12415	2.08883	0.0199358	-2.5815	-1.68857	0.0675275	0.907464	0.174239	0.0904943	2.06553	0.115899	-1.11651	-0.90609	1.17116	0.0974725	-1.98097	-1.03372	2.66464	0.00642765	-1.80673	-1.43707	>sp|Q01780|EXOSX_HUMAN Exosome component 10 OS=Homo sapiens GN=EXOSC10 PE=1 SV=2	Q01780	Exosome component 10	EXOSX_HUMAN	17.4516	17.0873	17.4207
EXOSC2	+	+						+	+	3'-5' exonuclease activity;3'-5'-exoribonuclease activity;7S RNA binding;binding;catalytic activity;exonuclease activity;exonuclease activity, active with either ribo- or deoxyribonucleic acids and producing 5'-phosphomonoesters;exoribonuclease activity;exoribonuclease activity, producing 5'-phosphomonoesters;hydrolase activity;hydrolase activity, acting on ester bonds;nuclease activity;nucleic a…	biological regulation;catabolic process;cellular localization;cellular metabolic process;cellular nitrogen compound metabolic process;cellular process;localization;macromolecule metabolic process;metabolic process;mRNA metabolic process;nitrogen compound metabolic process;nucleobase-containing compound metabolic process;primary metabolic process;RNA catabolic process;RNA metabolic process;RNA pro…	cell part;cytoplasm;cytosol;exosome (RNase complex);intracellular membrane-bounded organelle;intracellular non-membrane-bounded organelle;intracellular organelle;macromolecular complex;nucleolus;nucleus;organelle;protein complex	3D-structure;Alternativesplicing;Completeproteome;Cytoplasm;Exosome;Nucleus;Phosphoprotein;Referenceproteome;RNA-binding;rRNAprocessing	9	3.52124	0.0102207	-1.36837	-1.22553	3.34349	0.0571793	-1.10223	-0.998137	0.993809	0.735769	0.266141	0.236446	1.25148	0.697291	-0.356284	-0.308263	0.548812	0.701573	-0.223213	-0.189172	4.58334	0.0839933	-1.2353	-1.09579	3.18172	0.00670189	-1.59158	-1.36524	>sp|Q13868|EXOS2_HUMAN Exosome complex component RRP4 OS=Homo sapiens GN=EXOSC2 PE=1 SV=2	Q13868	Exosome complex component RRP4	EXOS2_HUMAN	16.2304	16.2536	16.0453
EXOSC4	+	+						+	+	3'-5' exonuclease activity;3'-5'-exoribonuclease activity;AU-rich element binding;binding;catalytic activity;exonuclease activity;exonuclease activity, active with either ribo- or deoxyribonucleic acids and producing 5'-phosphomonoesters;exoribonuclease activity;exoribonuclease activity, producing 5'-phosphomonoesters;hydrolase activity;hydrolase activity, acting on ester bonds;nuclease activity;…	biological regulation;catabolic process;cellular metabolic process;cellular nitrogen compound metabolic process;cellular process;DNA metabolic process;DNA modification;immune system process;macromolecule metabolic process;macromolecule modification;metabolic process;mRNA metabolic process;multi-organism process;nitrogen compound metabolic process;nucleobase-containing compound metabolic process;p…	cell part;cytoplasm;cytosol;exosome (RNase complex);intracellular membrane-bounded organelle;intracellular non-membrane-bounded organelle;intracellular organelle;macromolecular complex;nucleolus;nucleus;organelle;protein complex	3D-structure;Acetylation;Completeproteome;Cytoplasm;Directproteinsequencing;Exosome;Nucleus;Referenceproteome;RNA-binding;rRNAprocessing	5	3.37444	0.00981776	-1.39051	-1.23144	2.8529	0.0588819	-1.13352	-0.990946	0.711777	0.755036	0.256997	0.220611	1.50674	0.637993	-0.467567	-0.398306	0.799241	0.562421	-0.339069	-0.283492	4.28288	0.0825646	-1.26202	-1.10256	3.1955	0.00587037	-1.72958	-1.46738	>sp|Q9NPD3|EXOS4_HUMAN Exosome complex component RRP41 OS=Homo sapiens GN=EXOSC4 PE=1 SV=3	Q9NPD3	Exosome complex component RRP41	EXOS4_HUMAN	14.727	14.854	14.9741
EXOSC5	+	+						+	+	3'-5' exonuclease activity;3'-5'-exoribonuclease activity;binding;catalytic activity;exonuclease activity;exonuclease activity, active with either ribo- or deoxyribonucleic acids and producing 5'-phosphomonoesters;exoribonuclease activity;exoribonuclease activity, producing 5'-phosphomonoesters;hydrolase activity;hydrolase activity, acting on ester bonds;nuclease activity;nucleic acid binding;rib…	catabolic process;cellular metabolic process;cellular nitrogen compound metabolic process;cellular process;DNA metabolic process;DNA modification;immune system process;macromolecule metabolic process;macromolecule modification;metabolic process;mRNA metabolic process;multi-organism process;nitrogen compound metabolic process;nucleobase-containing compound metabolic process;primary metabolic proce…	cell part;cytoplasm;cytosol;exosome (RNase complex);intracellular membrane-bounded organelle;intracellular non-membrane-bounded organelle;intracellular organelle;macromolecular complex;nucleolus;nucleus;organelle;protein complex	3D-structure;Completeproteome;Cytoplasm;Exosome;Nucleus;Phosphoprotein;Polymorphism;Referenceproteome;RNA-binding;rRNAprocessing	2	5.22743	0.00506374	-1.65165	-1.56979	2.75977	0.0233818	-1.55975	-1.28957	0.165192	0.925237	0.091898	0.0759781	0.178674	0.927986	-0.0813332	-0.069005	0.0717768	0.956358	-0.0353842	-0.0301733	5.01407	0.0378667	-1.6057	-1.40545	3.21119	0.00623377	-1.68703	-1.43862	>sp|Q9NQT4|EXOS5_HUMAN Exosome complex component RRP46 OS=Homo sapiens GN=EXOSC5 PE=1 SV=1	Q9NQT4	Exosome complex component RRP46	EXOS5_HUMAN	13.3971	13.3322	13.4597
EXOSC8	+	+						+	+	AU-rich element binding;binding;nucleic acid binding;RNA binding	catabolic process;cellular metabolic process;cellular nitrogen compound metabolic process;cellular process;macromolecule metabolic process;metabolic process;mRNA metabolic process;nitrogen compound metabolic process;nucleobase-containing compound metabolic process;primary metabolic process;RNA catabolic process;RNA metabolic process;RNA processing;rRNA processing	cell part;cytoplasm;cytosol;exosome (RNase complex);intracellular membrane-bounded organelle;intracellular non-membrane-bounded organelle;intracellular organelle;macromolecular complex;nucleolus;nucleus;organelle;protein complex	3D-structure;Acetylation;Completeproteome;Cytoplasm;Diseasemutation;Exosome;Neurodegeneration;Nucleus;Referenceproteome;RNA-binding;rRNAprocessing	5	3.41907	0.00889	-1.44886	-1.28095	3.92288	0.0231917	-1.41303	-1.29033	0.126714	0.972011	0.0358359	0.0324706	2.40121	0.626066	-0.465178	-0.418925	1.28072	0.436134	-0.447261	-0.384318	6.03229	0.0455959	-1.43095	-1.31307	3.55313	0.0038804	-1.89613	-1.6367	>sp|Q96B26|EXOS8_HUMAN Exosome complex component RRP43 OS=Homo sapiens GN=EXOSC8 PE=1 SV=1	Q96B26	Exosome complex component RRP43	EXOS8_HUMAN	16.194	16.3141	16.0114
EYA3	+	+						+	+	binding;catalytic activity;cation binding;chromatin binding;hydrolase activity;hydrolase activity, acting on ester bonds;ion binding;metal ion binding;phosphatase activity;phosphoprotein phosphatase activity;phosphoric ester hydrolase activity;protein tyrosine phosphatase activity;protein tyrosine/serine/threonine phosphatase activity	anatomical structure morphogenesis;biological regulation;biosynthetic process;cellular component organization;cellular metabolic process;cellular nitrogen compound metabolic process;cellular process;chromatin modification;chromatin organization;chromosome organization;developmental process;DNA metabolic process;DNA repair;histone modification;macromolecule metabolic process;macromolecule modifica…	cell part;centrosome;cytoplasm;intracellular membrane-bounded organelle;intracellular non-membrane-bounded organelle;intracellular organelle;macromolecular complex;microtubule organizing center;nucleoplasm;nucleus;organelle;protein complex;transcription factor complex	Acetylation;Activator;Alternativesplicing;Chromatinregulator;Completeproteome;Cytoplasm;Developmentalprotein;DNAdamage;DNArepair;Hydrolase;Magnesium;Metal-binding;Nucleus;Phosphoprotein;Proteinphosphatase;Referenceproteome;Transcription;Transcriptionregulation	2	0.972426	0.0259012	1.72446	0.941899	0.78927	0.0818143	1.86075	0.891077	0.0666338	0.920037	0.136283	0.0795498	0.453838	0.683403	0.495818	0.331208	0.996504	0.380339	0.56396	0.445666	1.38961	0.0968296	1.7926	1.04464	1.24404	0.00850502	2.28842	1.22788	>sp|Q99504|EYA3_HUMAN Eyes absent homolog 3 OS=Homo sapiens GN=EYA3 PE=1 SV=3	Q99504	Eyes absent homolog 3	EYA3_HUMAN	16.7036	14.2519	14.198
F11R	+	+				+		+		binding;PDZ domain binding;protein binding;protein domain specific binding	biological adhesion;biological regulation;cell adhesion;cell junction organization;cell motility;cellular component assembly;cellular component movement;cellular component organization;cellular process;coagulation;cytoskeleton organization;establishment of localization;extracellular matrix organization;extracellular structure organization;immune system process;locomotion;multicellular organismal …	cell part;cytoskeleton;extracellular organelle;intracellular non-membrane-bounded organelle;intracellular organelle;membrane;organelle;plasma membrane;vesicle	3D-structure;Alternativesplicing;Celljunction;Cellmembrane;Completeproteome;Directproteinsequencing;Disulfidebond;Glycoprotein;Host-virusinteraction;Immunoglobulindomain;Membrane;Phosphoprotein;Referenceproteome;Repeat;Signal;Tightjunction;Transmembrane;Transmembranehelix	10	2.39671	0.0088053	-1.67647	-1.30779	3.49707	0.00813793	-2.32748	-1.93779	1.22267	0.438297	-0.651007	-0.520747	3.54195	0.189433	2.00258	1.53978	2.27268	0.0336203	1.67707	1.28505	3.6305	0.0326996	-2.00198	-1.55107	0.000733836	0.99949	0.000599543	0.000473446	>sp|Q9Y624|JAM1_HUMAN Junctional adhesion molecule A OS=Homo sapiens GN=F11R PE=1 SV=1	Q9Y624	Junctional adhesion molecule A	JAM1_HUMAN	16.8388	16.5574	16.2524
FAM114A1	+		+					+	+			cell part;cytoplasm	Alternativesplicing;Coiledcoil;Completeproteome;Cytoplasm;Phosphoprotein;Polymorphism;Referenceproteome	13	3.40969	0.00216279	2.7533	2.20178	1.29509	0.168483	0.888061	0.67206	1.99639	0.0517467	-1.86524	-1.32654	0.134279	0.855456	0.237597	0.14211	1.14889	0.301462	-0.695024	-0.541088	1.53467	0.0841511	1.82068	1.09278	3.91699	0.00390148	2.05828	1.80711	>sp|Q8IWE2|NXP20_HUMAN Protein NOXP20 OS=Homo sapiens GN=FAM114A1 PE=1 SV=2	Q8IWE2	Protein NOXP20	NXP20_HUMAN	19.1409	19.2151	19.2088
FAM136A	+	+						+	+			cell part;cytoplasm;intracellular membrane-bounded organelle;intracellular organelle;mitochondrion;organelle	Acetylation;Completeproteome;Mitochondrion;Phosphoprotein;Referenceproteome	7	1.86893	0.00891228	-1.84107	-1.28145	1.22734	0.0414706	-1.85847	-1.086	0.0095417	0.991699	-0.0174052	-0.0108742	0.284339	0.783992	0.293688	0.204916	0.378682	0.654749	0.284986	0.216554	2.22126	0.0535628	-1.84977	-1.2532	1.45918	0.0200802	-1.55608	-1.04082	>sp|Q96C01|F136A_HUMAN Protein FAM136A OS=Homo sapiens GN=FAM136A PE=1 SV=1	Q96C01	Protein FAM136A	F136A_HUMAN	14.9404	13.5925	13.8804
FAM169A	+	+						+				cell part;membrane	Alternativesplicing;Completeproteome;Membrane;Nucleus;Phosphoprotein;Referenceproteome	2	2.74761	0.00492099	-2.03169	-1.59357	1.33174	0.039717	-1.79216	-1.09967	0.151261	0.838378	0.239533	0.150576	1.02955	0.51471	1.03751	0.676091	0.961787	0.186103	1.15728	0.740215	2.54282	0.0433019	-1.91192	-1.34006	0.654907	0.169335	-0.874411	-0.545093	>sp|Q9Y6X4|F169A_HUMAN Soluble lamin-associated protein of 75 kDa OS=Homo sapiens GN=FAM169A PE=1 SV=2	Q9Y6X4	Soluble lamin-associated protein of 75 kDa	F169A_HUMAN	11.4057	12.1583	12.1415
FAM65B	+							+	+		anatomical structure development;cell differentiation;cellular process;developmental process;multicellular organismal process;neurological system process	cell part;cell projection;cytoplasm;cytoskeleton;filopodium;intracellular membrane-bounded organelle;intracellular non-membrane-bounded organelle;intracellular organelle;mitochondrion;organelle	Alternativesplicing;Cellmembrane;Cellprojection;Coiledcoil;Completeproteome;Cytoplasm;Cytoskeleton;Deafness;Developmentalprotein;Differentiation;Hearing;Membrane;Mitochondrion;Myogenesis;Non-syndromicdeafness;Polymorphism;Referenceproteome	2	3.91993	0.0023619	3.08351	2.55286	0.560636	0.218444	1.12869	0.596159	1.03242	0.10797	-1.95482	-1.03476	0.323615	0.641252	0.814682	0.391957	0.0566165	0.88106	-0.162728	-0.0816502	1.33466	0.0770407	2.1061	1.1255	1.36863	0.00582989	2.92079	1.46282	>sp|Q9Y4F9|FA65B_HUMAN Protein FAM65B OS=Homo sapiens GN=FAM65B PE=1 SV=4	Q9Y4F9	Protein FAM65B	FA65B_HUMAN	15.9193	15.4205	15.4678
FANCI	+	+						+		binding;DNA binding;DNA polymerase binding;enzyme binding;nucleic acid binding;protein binding	biological regulation;cell cycle;cellular metabolic process;cellular nitrogen compound metabolic process;cellular process;DNA metabolic process;DNA repair;macromolecule metabolic process;metabolic process;nitrogen compound metabolic process;nucleobase-containing compound metabolic process;primary metabolic process;regulation of protein modification process;response to DNA damage stimulus;response…	cell part;cytoplasm;intracellular membrane-bounded organelle;intracellular organelle;membrane;nucleoplasm;nucleus;organelle;plasma membrane	Alternativesplicing;Cellcycle;Completeproteome;Directproteinsequencing;Diseasemutation;DNA-binding;DNAdamage;DNArepair;Fanconianemia;Isopeptidebond;Nucleus;Phosphoprotein;Polymorphism;Referenceproteome;Ublconjugation	8	0.883758	0.0649763	-1.10597	-0.698651	1.68072	0.0174156	-2.33658	-1.43197	1.91562	0.138252	-1.23061	-0.959305	0.756631	0.593219	0.705284	0.480602	0.133311	0.897774	0.0899792	0.0720655	1.67671	0.0852443	-1.72128	-1.08861	0.756817	0.11295	-1.01599	-0.628258	>sp|Q9NVI1|FANCI_HUMAN Fanconi anemia group I protein OS=Homo sapiens GN=FANCI PE=1 SV=4	Q9NVI1	Fanconi anemia group I protein	FANCI_HUMAN	14.9128	15.0244	13.2493
FAS	+	+						+		binding;enzyme binding;identical protein binding;kinase binding;molecular transducer activity;protein binding;receptor activity;signal transducer activity;signaling receptor activity;transmembrane signaling receptor activity	anatomical structure development;biological regulation;cell death;cellular component assembly;cellular component organization;cellular process;death;developmental process;immune system process;macromolecular complex assembly;multicellular organismal process;protein complex assembly;response to abiotic stimulus;response to chemical stimulus;response to endogenous stimulus;response to external stim…	cell part;cell surface;cytoplasm;cytosol;death-inducing signaling complex;extracellular organelle;intracellular membrane-bounded organelle;intracellular organelle;macromolecular complex;membrane;nucleus;organelle;plasma membrane;protein complex;vesicle	3D-structure;Alternativesplicing;Apoptosis;Cellmembrane;Completeproteome;Directproteinsequencing;Diseasemutation;Disulfidebond;Glycoprotein;Membrane;Phosphoprotein;Polymorphism;Receptor;Referenceproteome;Repeat;Secreted;Signal;Transmembrane;Transmembranehelix	2	2.41084	0.00734928	1.82236	1.3978	5.03043	0.0104494	1.88223	1.76471	0.0674125	0.958976	0.0598628	0.0457014	2.24259	0.437284	-1.03689	-0.820166	1.19109	0.193679	-1.00696	-0.720591	4.39286	0.0329739	1.8523	1.53826	1.46845	0.103859	0.815401	0.648382	>sp|P25445|TNR6_HUMAN Tumor necrosis factor receptor superfamily member 6 OS=Homo sapiens GN=FAS PE=1 SV=1	P25445	Tumor necrosis factor receptor superfamily member 6	TNR6_HUMAN	16.5076	16.4445	16.483
FASN	+	+						+	+	[acyl-carrier-protein] S-acetyltransferase activity;[acyl-carrier-protein] S-malonyltransferase activity;3-hydroxyacyl-[acyl-carrier-protein] dehydratase activity;3-hydroxyoctanoyl-[acyl-carrier-protein] dehydratase activity;3-hydroxypalmitoyl-[acyl-carrier-protein] dehydratase activity;3-oxoacyl-[acyl-carrier-protein] reductase (NADPH) activity;3-oxoacyl-[acyl-carrier-protein] synthase activity;…	amine metabolic process;biological regulation;biosynthetic process;cell differentiation;cellular amino acid metabolic process;cellular ketone metabolic process;cellular lipid metabolic process;cellular metabolic process;cellular nitrogen compound metabolic process;cellular process;cofactor metabolic process;developmental process;energy reserve metabolic process;generation of precursor metabolites…	cell part;cytoplasm;cytoplasmic membrane-bounded vesicle;cytosol;extracellular organelle;Golgi apparatus;intracellular membrane-bounded organelle;intracellular organelle;membrane;mitochondrion;organelle;plasma membrane;vesicle	3D-structure;Acetylation;Completeproteome;Cytoplasm;Directproteinsequencing;Fattyacidbiosynthesis;Fattyacidmetabolism;Hydrolase;Lipidbiosynthesis;Lipidmetabolism;Lyase;Multifunctionalenzyme;NAD;NADP;Oxidoreductase;Phosphopantetheine;Phosphoprotein;Polymorphism;Pyridoxalphosphate;Referenceproteome;Transferase	129	2.56328	0.0244915	-1.11725	-0.955461	2.60322	0.0215196	-1.66491	-1.33601	0.937861	0.52741	-0.547662	-0.430189	0.485854	0.763336	0.283621	0.223505	0.0161188	0.990561	0.00978978	0.0081485	2.97972	0.082106	-1.39108	-1.10463	2.60956	0.029885	-1.10746	-0.95215	>sp|P49327|FAS_HUMAN Fatty acid synthase OS=Homo sapiens GN=FASN PE=1 SV=3	P49327	Fatty acid synthase	FAS_HUMAN	23.2435	23.0408	22.9541
FBL	+	+						+	+	binding;catalytic activity;methyltransferase activity;nucleic acid binding;RNA binding;RNA methyltransferase activity;rRNA methyltransferase activity;S-adenosylmethionine-dependent methyltransferase activity;transferase activity;transferase activity, transferring one-carbon groups	cell differentiation;cellular metabolic process;cellular nitrogen compound metabolic process;cellular process;developmental process;macromolecule metabolic process;macromolecule modification;metabolic process;nitrogen compound metabolic process;nucleobase-containing compound metabolic process;one-carbon metabolic process;primary metabolic process;RNA metabolic process;RNA modification;RNA process…	cell part;extracellular organelle;intracellular membrane-bounded organelle;intracellular non-membrane-bounded organelle;intracellular organelle;macromolecular complex;membrane;nucleolus;nucleus;organelle;preribosome;ribonucleoprotein complex;small nucleolar ribonucleoprotein complex;vesicle	3D-structure;Completeproteome;Methylation;Methyltransferase;Nucleus;Phosphoprotein;Referenceproteome;Ribonucleoprotein;RNA-binding;rRNAprocessing;S-adenosyl-L-methionine;Transferase	17	5.37374	0.00887706	-1.33763	-1.28765	4.75396	0.0238501	-1.35675	-1.28441	0.135042	0.987138	-0.0191224	-0.0181735	1.28899	0.844541	0.160076	0.14985	0.746043	0.787155	0.150515	0.137756	8.25364	0.0491878	-1.34719	-1.29497	3.62736	0.0167784	-1.18711	-1.08413	>sp|P22087|FBRL_HUMAN rRNA 2'-O-methyltransferase fibrillarin OS=Homo sapiens GN=FBL PE=1 SV=2	P22087	rRNA 2'-O-methyltransferase fibrillarin	FBRL_HUMAN	18.9247	19.0166	18.921
FDFT1	+	+						+	+	catalytic activity;farnesyl-diphosphate farnesyltransferase activity;farnesyltranstransferase activity;oxidoreductase activity;prenyltransferase activity;squalene synthase activity;transferase activity;transferase activity, transferring alkyl or aryl (other than methyl) groups	alcohol metabolic process;biosynthetic process;cellular lipid metabolic process;cellular metabolic process;cellular process;lipid metabolic process;metabolic process;primary metabolic process;small molecule metabolic process	cell part;endoplasmic reticulum;intracellular membrane-bounded organelle;intracellular organelle;membrane;organelle	3D-structure;Alternativesplicing;Cholesterolbiosynthesis;Cholesterolmetabolism;Completeproteome;Endoplasmicreticulum;Isoprenebiosynthesis;Lipidbiosynthesis;Lipidmetabolism;Magnesium;Membrane;Multifunctionalenzyme;NADP;Oxidoreductase;Polymorphism;Referenceproteome;Steroidbiosynthesis;Steroidmetabolism;Sterolbiosynthesis;Sterolmetabolism;Transferase;Transmembrane;Transmembranehelix	18	2.58207	0.00265517	-2.36761	-1.74772	3.08319	0.00509333	-3.18813	-2.35767	0.860941	0.39663	-0.820524	-0.568564	0.300978	0.768939	-0.313954	-0.217791	0.766232	0.326145	-0.724216	-0.504665	3.58947	0.0294894	-2.77787	-1.9707	3.08131	0.00127059	-3.09182	-2.30392	>sp|P37268|FDFT_HUMAN Squalene synthase OS=Homo sapiens GN=FDFT1 PE=1 SV=1	P37268	Squalene synthase	FDFT_HUMAN	17.4492	17.05	16.9015
FDXR	+	+						+	+	catalytic activity;ferredoxin-NADP+ reductase activity;NADPH-adrenodoxin reductase activity;oxidoreductase activity;oxidoreductase activity, acting on iron-sulfur proteins as donors;oxidoreductase activity, acting on iron-sulfur proteins as donors, NAD or NADP as acceptor	alcohol metabolic process;biological regulation;biosynthetic process;cellular ketone metabolic process;cellular metabolic process;cellular process;cofactor metabolic process;generation of precursor metabolites and energy;hormone metabolic process;lipid metabolic process;metabolic process;primary metabolic process;small molecule metabolic process;xenobiotic metabolic process	cell part;intracellular membrane-bounded organelle;intracellular organelle;mitochondrion;organelle	Alternativesplicing;Cholesterolmetabolism;Completeproteome;Electrontransport;FAD;Flavoprotein;Lipidmetabolism;Mitochondrion;NADP;Oxidoreductase;Polymorphism;Referenceproteome;Steroidmetabolism;Sterolmetabolism;Transitpeptide;Transport	10	3.01469	0.00789358	1.6526	1.38846	3.01235	0.0126093	2.01348	1.63417	0.669164	0.681852	0.36088	0.289946	0.575997	0.725136	-0.341554	-0.266377	0.181218	0.817888	-0.161114	-0.120378	4.22211	0.0340898	1.83304	1.5091	1.97464	0.0124729	1.49149	1.12187	>sp|P22570|ADRO_HUMAN NADPH:adrenodoxin oxidoreductase, mitochondrial OS=Homo sapiens GN=FDXR PE=1 SV=3	P22570	NADPH:adrenodoxin oxidoreductase, mitochondrial	ADRO_HUMAN	18.7281	18.6689	18.3333
FHL1	+	+						+	+	binding;cation binding;ion binding;ion channel binding;metal ion binding;protein binding;transition metal ion binding;zinc ion binding	anatomical structure development;anatomical structure morphogenesis;biological regulation;cell differentiation;cellular process;developmental process;regulation of cell cycle;regulation of mitotic cell cycle;regulation of transport	cell part;cytoplasm;cytosol;intracellular membrane-bounded organelle;intracellular organelle;membrane;nucleus;organelle;plasma membrane	3D-structure;Acetylation;Alternativesplicing;Completeproteome;Cytoplasm;Developmentalprotein;Differentiation;Directproteinsequencing;Diseasemutation;LIMdomain;Metal-binding;Nucleus;Referenceproteome;Repeat;Zinc;Zinc-finger	11	3.51388	0.00157962	2.8062	2.26294	3.12696	0.010843	2.16302	1.75456	0.90338	0.478949	-0.643173	-0.482799	1.17588	0.570888	-0.678241	-0.516687	1.69854	0.163027	-0.999828	-0.789181	4.10704	0.0292157	2.48461	1.90655	3.90436	0.004	1.80637	1.60869	>sp|Q13642|FHL1_HUMAN Four and a half LIM domains protein 1 OS=Homo sapiens GN=FHL1 PE=1 SV=4	Q13642	Four and a half LIM domains protein 1	FHL1_HUMAN	20.518	20.525	20.4399
FHL2	+	+						+	+	androgen receptor binding;binding;cation binding;hormone receptor binding;identical protein binding;ion binding;metal ion binding;nuclear hormone receptor binding;protein binding;protein binding transcription factor activity;receptor binding;steroid hormone receptor binding;transcription coactivator activity;transcription cofactor activity;transcription factor binding;transcription factor binding…	anatomical structure development;anatomical structure formation involved in morphogenesis;biological regulation;biosynthetic process;cell development;cell differentiation;cellular lipid metabolic process;cellular metabolic process;cellular nitrogen compound metabolic process;cellular process;developmental process;lipid metabolic process;macromolecule metabolic process;metabolic process;nitrogen c…	cell part;cytoskeleton;intracellular membrane-bounded organelle;intracellular non-membrane-bounded organelle;intracellular organelle;nucleoplasm;nucleus;organelle	3D-structure;Alternativesplicing;Completeproteome;Cytoplasm;LIMdomain;Metal-binding;Nucleus;Phosphoprotein;Polymorphism;Referenceproteome;Repeat;Transcription;Transcriptionregulation;Zinc;Zinc-finger	15	4.64611	0.00215652	2.80267	2.4938	4.7959	0.00565926	2.71841	2.44869	0.377942	0.92385	-0.0842584	-0.0770478	1.33477	0.660596	0.438528	0.371194	0.66908	0.530303	0.396399	0.312431	7.91836	0.0386667	2.76054	2.52721	3.50595	0.00203774	3.19907	2.50915	>sp|Q14192|FHL2_HUMAN Four and a half LIM domains protein 2 OS=Homo sapiens GN=FHL2 PE=1 SV=3	Q14192	Four and a half LIM domains protein 2	FHL2_HUMAN	21.2613	20.9774	20.9652
FKBP1A	+		+			+		+	+	activin binding;binding;catalytic activity;cis-trans isomerase activity;cytokine receptor binding;drug binding;FK506 binding;ion channel binding;isomerase activity;macrolide binding;molecular transducer activity;peptidyl-prolyl cis-trans isomerase activity;protein binding;protein complex binding;receptor binding;signal transducer activity;SMAD binding;transforming growth factor beta receptor bind…	anatomical structure formation involved in morphogenesis;anatomical structure morphogenesis;biological regulation;cell activation;cellular component assembly;cellular component organization;cellular macromolecular complex assembly;cellular metabolic process;cellular process;developmental process;establishment of localization;extracellular matrix organization;extracellular structure organization;i…	cell part;cytoplasm;cytosol;extracellular organelle;membrane;organelle;vesicle	3D-structure;Acetylation;Completeproteome;Cytoplasm;Directproteinsequencing;Isomerase;Referenceproteome;Rotamase	3	3.09207	0.00220118	2.93939	2.2217	1.39241	0.13229	0.994775	0.746163	1.87389	0.0512323	-1.94462	-1.33219	0.446587	0.626611	-0.703973	-0.410487	1.96775	0.0421573	-1.67628	-1.22179	1.57098	0.0708	1.96708	1.15392	2.53287	0.0188677	1.26311	1.05693	>sp|P62942|FKB1A_HUMAN Peptidyl-prolyl cis-trans isomerase FKBP1A OS=Homo sapiens GN=FKBP1A PE=1 SV=2	P62942	Peptidyl-prolyl cis-trans isomerase FKBP1A	FKB1A_HUMAN	19.9232	19.8339	19.7683
FKBP4	+	+						+	+	adenyl nucleotide binding;adenyl ribonucleotide binding;ATP binding;binding;binding, bridging;catalytic activity;cis-trans isomerase activity;drug binding;FK506 binding;GTP binding;guanyl nucleotide binding;guanyl ribonucleotide binding;heat shock protein binding;isomerase activity;macrolide binding;nucleotide binding;peptidyl-prolyl cis-trans isomerase activity;protein binding;protein binding, b…	anatomical structure development;biological regulation;cellular component assembly;cellular component organization;cellular macromolecular complex assembly;cellular metabolic process;cellular process;developmental process;establishment of localization;ion transport;localization;macromolecular complex assembly;macromolecule metabolic process;macromolecule modification;metabolic process;peptidyl-am…	cell body;cell part;cytoplasm;cytosol;extracellular organelle;intracellular membrane-bounded organelle;intracellular organelle;macromolecular complex;membrane;mitochondrion;neuronal cell body;nucleoplasm;organelle;protein complex;site of polarized growth;vesicle	3D-structure;Acetylation;Chaperone;Completeproteome;Cytoplasm;Cytoskeleton;Directproteinsequencing;Isomerase;Microtubule;Mitochondrion;Nucleus;Phosphoprotein;Polymorphism;Referenceproteome;Repeat;Rotamase;TPRrepeat	33	5.14221	0.00225455	-2.41299	-2.23418	4.36436	0.004775	-2.63153	-2.31458	0.61972	0.785876	-0.218548	-0.188647	3.28808	0.475834	0.860394	0.753294	2.37049	0.221373	0.75112	0.665643	6.71005	0.0396923	-2.52226	-2.23989	4.10455	0.0057551	-1.66187	-1.50998	>sp|Q02790|FKBP4_HUMAN Peptidyl-prolyl cis-trans isomerase FKBP4 OS=Homo sapiens GN=FKBP4 PE=1 SV=3	Q02790	Peptidyl-prolyl cis-trans isomerase FKBP4	FKBP4_HUMAN	19.2996	19.2955	19.2857
FKBP5	+	+						+	+	binding;catalytic activity;cis-trans isomerase activity;drug binding;FK506 binding;heat shock protein binding;isomerase activity;macrolide binding;peptidyl-prolyl cis-trans isomerase activity;protein binding	cellular metabolic process;cellular process;macromolecule metabolic process;macromolecule modification;metabolic process;peptidyl-amino acid modification;primary metabolic process;protein folding;protein metabolic process;protein modification process	cell part;extracellular organelle;membrane;nucleoplasm;organelle;vesicle	3D-structure;Acetylation;Alternativesplicing;Chaperone;Completeproteome;Cytoplasm;Isomerase;Nucleus;Phosphoprotein;Referenceproteome;Repeat;Rotamase;TPRrepeat	13	2.5515	0.00723077	-1.77961	-1.39941	1.96964	0.0810613	-1.11641	-0.894963	1.48797	0.40868	0.663205	0.549719	1.33341	0.568195	-0.664101	-0.520884	0.664645	0.576288	-0.332498	-0.271038	2.78625	0.0775622	-1.44801	-1.12085	2.87436	0.00367491	-2.11211	-1.67015	>sp|Q13451|FKBP5_HUMAN Peptidyl-prolyl cis-trans isomerase FKBP5 OS=Homo sapiens GN=FKBP5 PE=1 SV=2	Q13451	Peptidyl-prolyl cis-trans isomerase FKBP5	FKBP5_HUMAN	15.8584	16.5759	16.0448
FKBP9	+	+						+	+	binding;calcium ion binding;catalytic activity;cation binding;cis-trans isomerase activity;drug binding;FK506 binding;ion binding;isomerase activity;macrolide binding;metal ion binding;peptidyl-prolyl cis-trans isomerase activity	cellular metabolic process;cellular process;macromolecule metabolic process;macromolecule modification;metabolic process;peptidyl-amino acid modification;primary metabolic process;protein folding;protein metabolic process;protein modification process	cell part;endoplasmic reticulum;intracellular membrane-bounded organelle;intracellular organelle;membrane;organelle	Alternativesplicing;Calcium;Completeproteome;Endoplasmicreticulum;Glycoprotein;Isomerase;Metal-binding;Phosphoprotein;Referenceproteome;Repeat;Rotamase;Signal	12	3.23216	0.00291765	3.68055	2.68254	3.02839	0.00519728	3.24695	2.36879	0.347542	0.685533	-0.433603	-0.285741	0.737068	0.626921	-0.567501	-0.409975	0.903363	0.291891	-0.784303	-0.558194	4.4843	0.0409412	3.46375	2.52895	4.02432	0.00177049	2.89625	2.44678	>sp|O95302|FKBP9_HUMAN Peptidyl-prolyl cis-trans isomerase FKBP9 OS=Homo sapiens GN=FKBP9 PE=1 SV=2	O95302	Peptidyl-prolyl cis-trans isomerase FKBP9	FKBP9_HUMAN	20.5063	20.2999	20.337
FLJ45252	+							+					Acetylation;Completeproteome;Phosphoprotein;Referenceproteome	4	3.43172	0.00505263	1.82584	1.56864	0.804977	0.105449	1.53267	0.815068	0.120857	0.82926	-0.293173	-0.155526	0.689211	0.552162	-0.902183	-0.548471	1.15237	0.190346	-1.04877	-0.73444	1.60305	0.0950366	1.67925	1.05567	0.86396	0.167453	0.77707	0.547878	>sp|Q6ZSR9|YJ005_HUMAN Uncharacterized protein FLJ45252 OS=Homo sapiens PE=2 SV=2	Q6ZSR9	Uncharacterized protein FLJ45252	YJ005_HUMAN	16.6978	16.3822	16.4428
FLNC	+	+						+	+	ankyrin binding;binding;cytoskeletal protein binding;protein binding	anatomical structure development;cell development;cell junction organization;cellular component assembly;cellular component organization;cellular process;developmental process	cell part;cytoplasm;cytoskeleton;cytosol;intracellular non-membrane-bounded organelle;intracellular organelle;membrane;organelle;plasma membrane	3D-structure;Actin-binding;Alternativesplicing;Completeproteome;Cytoplasm;Cytoskeleton;Directproteinsequencing;Diseasemutation;Membrane;Myofibrillarmyopathy;Phosphoprotein;Polymorphism;Referenceproteome;Repeat;Ublconjugation	130	5.01959	0.00516667	3.39449	3.02849	2.87903	0.0102373	2.26905	1.76789	1.81741	0.168426	-1.12545	-0.881638	0.0739837	0.933921	-0.0893672	-0.062241	1.29801	0.313772	-0.65209	-0.52782	3.60407	0.0319518	2.83177	2.00087	3.45049	0.00241667	2.7424	2.20529	>sp|Q14315|FLNC_HUMAN Filamin-C OS=Homo sapiens GN=FLNC PE=1 SV=3	Q14315	Filamin-C	FLNC_HUMAN	25.0025	24.8047	24.6715
FMN2	+	+						+	+	actin binding;binding;cytoskeletal protein binding;protein binding	biological regulation;cellular component assembly;cellular component movement;cellular component organization;cellular process;cytokinesis;cytoskeleton organization;developmental process;establishment of localization;multicellular organismal development;multicellular organismal process;organelle organization;protein transport;response to chemical stimulus;response to DNA damage stimulus;response …	cell cortex;cell part;cell projection;cytosol;intracellular non-membrane-bounded organelle;intracellular organelle;membrane;microvillus;nucleolus;organelle;plasma membrane	3D-structure;Actin-binding;Alternativesplicing;Cellmembrane;Coiledcoil;Completeproteome;Cytoplasm;Cytoplasmicvesicle;Cytoskeleton;Developmentalprotein;DNAdamage;Membrane;Mentalretardation;Nucleus;Polymorphism;Proteintransport;Referenceproteome;Stressresponse;Transport	2	1.43847	0.0081267	2.43035	1.36114	2.7071	0.00601105	3.21505	2.22344	0.363155	0.545836	0.784704	0.412594	0.222346	0.744539	-0.448682	-0.247134	0.0170684	0.960492	-0.0563294	-0.0268797	2.49076	0.0291503	2.8227	1.71666	1.44171	0.00718397	2.37402	1.34473	>sp|Q9NZ56|FMN2_HUMAN Formin-2 OS=Homo sapiens GN=FMN2 PE=1 SV=4	Q9NZ56	Formin-2	FMN2_HUMAN	14.0416	14.0909	14.1648
FN3KRP	+	+	+					+		catalytic activity;kinase activity;transferase activity;transferase activity, transferring phosphorus-containing groups	cellular metabolic process;cellular process;metabolic process;phosphorus metabolic process		Completeproteome;Kinase;Phosphoprotein;Polymorphism;Referenceproteome;Transferase	2	1.36484	0.037087	1.20849	0.854889	2.5512	0.00473684	4.10917	2.52491	1.76648	0.0204021	2.90069	1.66868	1.26137	0.304987	-2.45815	-1.18892	1.1432	0.199389	-1.0078	-0.71244	1.38155	0.049995	2.65883	1.28608	0.632033	0.720693	0.200681	0.175565	>sp|Q9HA64|KT3K_HUMAN Ketosamine-3-kinase OS=Homo sapiens GN=FN3KRP PE=1 SV=2	Q9HA64	Ketosamine-3-kinase	KT3K_HUMAN	13.97	14.2521	14.2808
FNDC3B	+	+				+		+	+			cell part	Alternativesplicing;Completeproteome;Membrane;Phosphoprotein;Polymorphism;Referenceproteome;Repeat;Transmembrane;Transmembranehelix	3	3.269	0.00248	3.45517	2.57524	2.51944	0.00583206	3.97656	2.45573	0.299525	0.664084	0.521388	0.305449	1.75068	0.289343	-2.04227	-1.22839	1.1067	0.0904604	-1.78158	-1.01399	3.87377	0.0386316	3.71586	2.48822	1.1644	0.024495	1.67359	0.998646	>sp|Q53EP0|FND3B_HUMAN Fibronectin type III domain-containing protein 3B OS=Homo sapiens GN=FNDC3B PE=1 SV=2	Q53EP0	Fibronectin type III domain-containing protein 3B	FND3B_HUMAN	14.0169	14.0599	14.0668
FUBP1	+	+						+	+	binding;DNA binding;nucleic acid binding;nucleic acid binding transcription factor activity;sequence-specific DNA binding transcription factor activity;single-stranded DNA binding;structure-specific DNA binding	biological regulation;biosynthetic process;cellular metabolic process;cellular nitrogen compound metabolic process;cellular process;macromolecule metabolic process;metabolic process;nitrogen compound metabolic process;nucleobase-containing compound metabolic process;primary metabolic process;RNA metabolic process;transcription from RNA polymerase II promoter	cell part;intracellular membrane-bounded organelle;intracellular organelle;nucleoplasm;nucleus;organelle	3D-structure;Acetylation;Alternativesplicing;Completeproteome;Directproteinsequencing;DNA-binding;Nucleus;Phosphoprotein;Polymorphism;Referenceproteome;Repeat;Transcription;Transcriptionregulation;Ublconjugation	23	4.09894	0.00846959	-1.45015	-1.33278	3.76212	0.0287841	-1.33905	-1.21843	0.446871	0.895446	0.1111	0.10037	1.67008	0.724672	-0.29488	-0.268091	0.965624	0.657707	-0.23933	-0.214438	6.05604	0.0505616	-1.3946	-1.28322	3.99751	0.00536842	-1.68948	-1.52364	>sp|Q96AE4|FUBP1_HUMAN Far upstream element-binding protein 1 OS=Homo sapiens GN=FUBP1 PE=1 SV=3	Q96AE4	Far upstream element-binding protein 1	FUBP1_HUMAN	21.1203	20.9287	21.0179
FXR1	+	+						+		binding;G-quadruplex RNA binding;mRNA 3'-UTR binding;mRNA binding;nucleic acid binding;RNA binding	anatomical structure development;biological regulation;cell death;cell differentiation;cellular process;death;developmental process;regulation of translation	cell part;cytoplasm;intracellular non-membrane-bounded organelle;intracellular organelle;macromolecular complex;membrane;nucleolus;organelle;polysome;ribonucleoprotein complex	3D-structure;Acetylation;Alternativesplicing;Completeproteome;Cytoplasm;Developmentalprotein;Differentiation;Directproteinsequencing;Myogenesis;Phosphoprotein;Polymorphism;Referenceproteome;Repeat;RNA-binding	22	3.54758	0.0199053	-1.11991	-1.02376	5.05308	0.0408545	-1.13644	-1.09307	0.0626333	0.989885	-0.0165335	-0.0151446	4.33209	0.501353	0.783073	0.719614	2.37279	0.211553	0.774806	0.684295	6.34508	0.0932	-1.12818	-1.0606	1.54114	0.46088	-0.345105	-0.31281	>sp|P51114|FXR1_HUMAN Fragile X mental retardation syndrome-related protein 1 OS=Homo sapiens GN=FXR1 PE=1 SV=3	P51114	Fragile X mental retardation syndrome-related protein 1	FXR1_HUMAN	18.8702	18.8704	18.9648
FYN	+	+						+	+	adenyl nucleotide binding;adenyl ribonucleotide binding;ATP binding;binding;catalytic activity;cation binding;ephrin receptor binding;glycoprotein binding;growth factor receptor binding;ion binding;kinase activity;metal ion binding;non-membrane spanning protein tyrosine kinase activity;nucleotide binding;phosphotransferase activity, alcohol group as acceptor;protein binding;protein kinase activit…	anatomical structure development;anatomical structure morphogenesis;behavior;biological regulation;cell activation;cell differentiation;cell motility;cell proliferation;cellular component morphogenesis;cellular component movement;cellular component organization;cellular metabolic process;cellular process;coagulation;detection of stimulus;developmental process;establishment of localization;immune …	cell part;cytosol;endosome;intracellular membrane-bounded organelle;intracellular organelle;macromolecular complex;membrane;mitochondrion;nucleus;organelle;plasma membrane;protein complex	3D-structure;Adaptiveimmunity;Alternativesplicing;ATP-binding;Cellmembrane;Completeproteome;Cytoplasm;Developmentalprotein;Host-virusinteraction;Immunity;Kinase;Lipoprotein;Manganese;Membrane;Metal-binding;Myristate;Nucleotide-binding;Nucleus;Palmitate;Phosphoprotein;Polymorphism;Proto-oncogene;Referenceproteome;SH2domain;SH3domain;Transferase;Tyrosine-proteinkinase	2	3.85284	0.00474219	1.6919	1.51249	2.21558	0.0147477	2.12163	1.51511	0.442377	0.665906	0.429732	0.303247	0.814115	0.63699	-0.534004	-0.400437	0.621136	0.593349	-0.319138	-0.259251	3.35365	0.036292	1.90676	1.45857	2.63467	0.0121	1.37276	1.14484	>sp|P06241|FYN_HUMAN Tyrosine-protein kinase Fyn OS=Homo sapiens GN=FYN PE=1 SV=3	P06241	Tyrosine-protein kinase Fyn	FYN_HUMAN	21.5375	21.5714	21.5282
G6PD	+	+						+	+	binding;carbohydrate binding;catalytic activity;coenzyme binding;cofactor binding;glucose binding;glucose-6-phosphate dehydrogenase activity;identical protein binding;monosaccharide binding;NADP binding;nucleotide binding;oxidoreductase activity;oxidoreductase activity, acting on CH-OH group of donors;oxidoreductase activity, acting on the CH-OH group of donors, NAD or NADP as acceptor;protein bi…	alcohol metabolic process;amine metabolic process;anatomical structure development;biological regulation;biosynthetic process;carbohydrate metabolic process;catabolic process;cell maturation;cellular amino acid metabolic process;cellular ketone metabolic process;cellular metabolic process;cellular nitrogen compound metabolic process;cellular process;cofactor metabolic process;cytokine production;…	cell part;centrosome;cytoplasm;cytosol;extracellular organelle;intracellular membrane-bounded organelle;intracellular non-membrane-bounded organelle;intracellular organelle;membrane;microtubule organizing center;nucleus;organelle;vesicle	3D-structure;Acetylation;Alternativesplicing;Carbohydratemetabolism;Completeproteome;Directproteinsequencing;Diseasemutation;Glucosemetabolism;Hereditaryhemolyticanemia;NADP;Oxidoreductase;Phosphoprotein;Polymorphism;Referenceproteome	32	5.01539	0.00196825	2.31883	2.1416	1.83279	0.0261086	1.80884	1.25633	0.509398	0.616502	-0.509984	-0.354529	0.585167	0.691167	0.427504	0.316961	0.430504	0.775188	0.172512	0.147271	3.3376	0.0324405	2.06384	1.54637	3.85248	0.00191736	2.49134	2.12082	>sp|P11413|G6PD_HUMAN Glucose-6-phosphate 1-dehydrogenase OS=Homo sapiens GN=G6PD PE=1 SV=4	P11413	Glucose-6-phosphate 1-dehydrogenase	G6PD_HUMAN	22.1019	22.1691	21.955
GALE	+	+						+		binding;catalytic activity;coenzyme binding;cofactor binding;identical protein binding;isomerase activity;protein binding;protein dimerization activity;protein homodimerization activity;racemase and epimerase activity;racemase and epimerase activity, acting on carbohydrates and derivatives;UDP-glucose 4-epimerase activity;UDP-N-acetylglucosamine 4-epimerase activity	alcohol metabolic process;carbohydrate metabolic process;catabolic process;cellular metabolic process;cellular process;metabolic process;primary metabolic process;small molecule metabolic process	cell part;cytosol;extracellular organelle;organelle;vesicle	3D-structure;Alternativesplicing;Carbohydratemetabolism;Completeproteome;Diseasemutation;Galactosemetabolism;Isomerase;NAD;Polymorphism;Referenceproteome	2	2.16543	0.0106227	1.57256	1.20368	1.32848	0.0258849	2.24091	1.25228	0.342688	0.595035	0.66835	0.369807	1.00082	0.507918	-1.11766	-0.703142	1.11736	0.270836	-0.783489	-0.5892	1.86067	0.0616221	1.90673	1.20366	1.30497	0.118756	0.789071	0.614878	>sp|Q14376|GALE_HUMAN UDP-glucose 4-epimerase OS=Homo sapiens GN=GALE PE=1 SV=2	Q14376	UDP-glucose 4-epimerase	GALE_HUMAN	15.5071	16.1279	15.8912
GALNT1	+	+						+	+	acetylgalactosaminyltransferase activity;binding;carbohydrate binding;catalytic activity;cation binding;ion binding;manganese ion binding;metal ion binding;polypeptide N-acetylgalactosaminyltransferase activity;transferase activity;transferase activity, transferring glycosyl groups;transferase activity, transferring hexosyl groups;transition metal ion binding;UDP-glycosyltransferase activity	carbohydrate metabolic process;cellular metabolic process;cellular process;macromolecule metabolic process;macromolecule modification;metabolic process;peptidyl-amino acid modification;primary metabolic process;protein glycosylation;protein metabolic process;protein modification process	cell part;extracellular region;membrane	Alternativesplicing;Completeproteome;Disulfidebond;Glycoprotein;Glycosyltransferase;Golgiapparatus;Lectin;Manganese;Membrane;Metal-binding;Polymorphism;Referenceproteome;Secreted;Signal-anchor;Transferase;Transmembrane;Transmembranehelix	2	2.52182	0.0091916	-1.63562	-1.30396	3.1833	0.00801509	-2.41275	-1.92852	1.02727	0.39468	-0.77713	-0.573444	1.37922	0.511148	0.920208	0.671702	0.749506	0.421439	0.531643	0.401005	3.20684	0.0341935	-2.02418	-1.50482	2.22239	0.0356018	-1.10397	-0.914348	>sp|Q10472|GALT1_HUMAN Polypeptide N-acetylgalactosaminyltransferase 1 OS=Homo sapiens GN=GALNT1 PE=1 SV=1	Q10472	Polypeptide N-acetylgalactosaminyltransferase 1	GALT1_HUMAN	12.9131	12.9567	12.8597
GALNT7	+	+						+		acetylgalactosaminyltransferase activity;binding;carbohydrate binding;catalytic activity;cation binding;ion binding;metal ion binding;polypeptide N-acetylgalactosaminyltransferase activity;transferase activity;transferase activity, transferring glycosyl groups;transferase activity, transferring hexosyl groups;UDP-glycosyltransferase activity	carbohydrate metabolic process;cellular metabolic process;cellular process;macromolecule metabolic process;macromolecule modification;metabolic process;primary metabolic process;protein glycosylation;protein metabolic process;protein modification process	cell part;extracellular organelle;membrane;organelle;vesicle	Completeproteome;Disulfidebond;Glycosyltransferase;Golgiapparatus;Lectin;Manganese;Membrane;Metal-binding;Referenceproteome;Signal-anchor;Transferase;Transmembrane;Transmembranehelix	8	2.63227	0.0126341	-1.36458	-1.13887	2.87177	0.0269734	-1.47415	-1.24403	0.179085	0.907439	-0.10957	-0.0888957	2.32573	0.32497	1.52357	1.1089	1.26105	0.105047	1.46879	0.949689	4.1725	0.0602957	-1.41937	-1.21397	0.0689511	0.899745	0.104209	0.0681946	>sp|Q86SF2|GALT7_HUMAN N-acetylgalactosaminyltransferase 7 OS=Homo sapiens GN=GALNT7 PE=1 SV=1	Q86SF2	N-acetylgalactosaminyltransferase 7	GALT7_HUMAN	15.9742	15.82	16.1607
GAP43	+	+		+	iPSC_NSC	+		+		binding;calmodulin binding;protein binding	anatomical structure development;anatomical structure morphogenesis;biological regulation;cell differentiation;cell recognition;cellular process;developmental process;growth;regulation of protein modification process;response to stimulus;response to stress;signal transduction	cell part;cell projection;cytoplasm;membrane;neuron projection;plasma membrane	Alternativesplicing;Calmodulin-binding;Celljunction;Cellmembrane;Cellprojection;Completeproteome;Developmentalprotein;Differentiation;Growthregulation;Lipoprotein;Membrane;Neurogenesis;Palmitate;Phosphoprotein;Polymorphism;Referenceproteome;Synapse	8	1.78173	0.00261756	3.10111	1.74121	1.70249	0.0115142	3.16426	1.71747	0.0524389	0.959386	0.063144	0.0446447	4.95832	0.0712	-3.95777	-2.91436	3.20639	0.0137778	-3.9262	-2.79841	3.06002	0.0315714	3.13269	2.00085	0.420233	0.262782	-0.825083	-0.449181	>sp|P17677|NEUM_HUMAN Neuromodulin OS=Homo sapiens GN=GAP43 PE=1 SV=1	P17677	Neuromodulin	NEUM_HUMAN	17.7418	18.858	20.3569
GATAD2A	+	+						+	+	binding;binding, bridging;cation binding;DNA binding;ion binding;metal ion binding;nucleic acid binding;nucleic acid binding transcription factor activity;protein binding;protein binding, bridging;sequence-specific DNA binding;sequence-specific DNA binding transcription factor activity;transition metal ion binding;zinc ion binding	anatomical structure development;anatomical structure morphogenesis;biological regulation;biosynthetic process;cell death;cellular metabolic process;cellular nitrogen compound metabolic process;cellular process;death;developmental process;DNA metabolic process;DNA modification;embryo development;macromolecule metabolic process;macromolecule modification;metabolic process;nitrogen compound metabol…	cell part;chromatin remodeling complex;intracellular membrane-bounded organelle;intracellular organelle;macromolecular complex;nucleoplasm;nucleus;organelle;protein complex;transcriptional repressor complex	3D-structure;Alternativesplicing;Coiledcoil;Completeproteome;Metal-binding;Nucleus;Phosphoprotein;Polymorphism;Referenceproteome;Repressor;Transcription;Transcriptionregulation;Zinc;Zinc-finger	14	2.91621	0.00854227	-1.60599	-1.3426	4.04225	0.0170885	-1.59141	-1.44689	0.0230479	0.991617	0.0145766	0.0120338	1.01911	0.669859	-0.431851	-0.352705	0.571	0.521311	-0.424562	-0.31905	5.02483	0.0382947	-1.5987	-1.40073	2.75643	0.00417178	-2.03055	-1.59471	>sp|Q86YP4|P66A_HUMAN Transcriptional repressor p66-alpha OS=Homo sapiens GN=GATAD2A PE=1 SV=1	Q86YP4	Transcriptional repressor p66-alpha	P66A_HUMAN	15.9968	15.8455	15.92
GBP1	+	+						+	+	actin binding;binding;catalytic activity;cytokine binding;cytoskeletal protein binding;enzyme binding;GTP binding;GTPase activity;guanyl nucleotide binding;guanyl ribonucleotide binding;heat shock protein binding;Hsp90 protein binding;hydrolase activity;hydrolase activity, acting on acid anhydrides;hydrolase activity, acting on acid anhydrides, in phosphorus-containing anhydrides;identical protei…	biological regulation;cellular process;immune system process;multi-organism process;response to biotic stimulus;response to chemical stimulus;response to stimulus;response to stress;signal transduction	cell part;cytosol;extracellular region;membrane	3D-structure;Antiviraldefense;Completeproteome;Cytoplasm;Golgiapparatus;GTP-binding;Immunity;Lipoprotein;Membrane;Methylation;Nucleotide-binding;Polymorphism;Prenylation;Referenceproteome;Secreted	3	2.89472	0.0031	4.15662	2.74475	3.08888	0.00759322	4.32195	2.92838	0.0835995	0.898842	0.165324	0.0972488	0.544675	0.661324	0.538672	0.367526	0.522442	0.414955	0.621334	0.408049	4.42666	0.049	4.23929	2.90026	5.96997	0	4.77796	4.35035	>sp|P32455|GBP1_HUMAN Guanylate-binding protein 1 OS=Homo sapiens GN=GBP1 PE=1 SV=2	P32455	Guanylate-binding protein 1	GBP1_HUMAN	18.9345	18.991	18.9145
GCA	+	+						+	+	binding;calcium ion binding;calcium-dependent cysteine-type endopeptidase activity;catalytic activity;cation binding;cysteine-type endopeptidase activity;cysteine-type peptidase activity;endopeptidase activity;hydrolase activity;identical protein binding;ion binding;metal ion binding;peptidase activity;peptidase activity, acting on L-amino acid peptides;protein binding;protein dimerization activi…	cellular component organization;macromolecule metabolic process;membrane fusion;membrane organization;metabolic process;primary metabolic process;protein metabolic process;proteolysis	cell part;cytoplasm;extracellular organelle;membrane;organelle;plasma membrane;vesicle	3D-structure;Calcium;Completeproteome;Cytoplasm;Directproteinsequencing;Membrane;Metal-binding;Polymorphism;Referenceproteome;Repeat	2	1.13876	0.0073557	-3.48423	-1.4286	1.27516	0.012423	-4.20871	-1.65166	0.527486	0.509018	-0.724485	-0.451551	0.114318	0.885612	-0.181316	-0.113842	0.391845	0.488524	-0.543559	-0.342865	2.10528	0.0288889	-3.84647	-1.88101	1.22792	0.0040118	-4.02779	-1.58523	>sp|P28676|GRAN_HUMAN Grancalcin OS=Homo sapiens GN=GCA PE=1 SV=2	P28676	Grancalcin	GRAN_HUMAN	11.5008	8.51175	13.4353
GCDH	+	+						+		acyl-CoA dehydrogenase activity;binding;carboxylic acid binding;catalytic activity;coenzyme binding;cofactor binding;fatty acid binding;fatty-acyl-CoA binding;flavin adenine dinucleotide binding;glutaryl-CoA dehydrogenase activity;lipid binding;monocarboxylic acid binding;oxidoreductase activity;oxidoreductase activity, acting on the CH-CH group of donors	amine metabolic process;biosynthetic process;catabolic process;cellular amino acid metabolic process;cellular aromatic compound metabolic process;cellular ketone metabolic process;cellular lipid metabolic process;cellular metabolic process;cellular nitrogen compound metabolic process;cellular process;cofactor metabolic process;heterocycle metabolic process;lipid metabolic process;metabolic proces…	cell part;intracellular membrane-bounded organelle;intracellular organelle;membrane;mitochondrion;organelle	3D-structure;Acetylation;Alternativesplicing;Completeproteome;Diseasemutation;FAD;Flavoprotein;Glutaricaciduria;Mitochondrion;Oxidoreductase;Polymorphism;Referenceproteome;Transitpeptide	8	2.99583	0.00835556	-1.60185	-1.35005	1.97638	0.0741759	-1.16015	-0.923708	0.771932	0.620281	0.441691	0.349561	1.92022	0.439573	1.07617	0.815344	1.59108	0.107863	1.29702	0.943943	3.16485	0.0793542	-1.381	-1.11431	0.342109	0.629707	-0.304831	-0.22271	>sp|Q92947|GCDH_HUMAN Glutaryl-CoA dehydrogenase, mitochondrial OS=Homo sapiens GN=GCDH PE=1 SV=1	Q92947	Glutaryl-CoA dehydrogenase, mitochondrial	GCDH_HUMAN	15.3903	15.8198	15.5843
GCLM	+	+						+	+	acid-amino acid ligase activity;binding;catalytic activity;enzyme binding;enzyme regulator activity;glutamate-cysteine ligase activity;glutamate-cysteine ligase catalytic subunit binding;ligase activity;ligase activity, forming carbon-nitrogen bonds;protein binding	amine metabolic process;biological regulation;biosynthetic process;cellular amino acid metabolic process;cellular component organization;cellular ketone metabolic process;cellular metabolic process;cellular nitrogen compound metabolic process;cellular process;circulatory system process;metabolic process;mitochondrion organization;multicellular organismal process;nitrogen compound metabolic proces…	cell part;cytosol;macromolecular complex;protein complex	Acetylation;Alternativesplicing;Completeproteome;Glutathionebiosynthesis;Polymorphism;Referenceproteome	2	3.86776	0.0019893	2.52134	2.14539	1.73827	0.0117783	3.05615	1.70414	0.263768	0.675956	0.53481	0.295605	0.193545	0.752001	0.458496	0.236414	0.246059	0.499905	0.725901	0.335057	2.80017	0.028	2.78874	1.78887	1.31593	0.00591436	3.24724	1.50644	>sp|P48507|GSH0_HUMAN Glutamate--cysteine ligase regulatory subunit OS=Homo sapiens GN=GCLM PE=1 SV=1	P48507	Glutamate--cysteine ligase regulatory subunit	GSH0_HUMAN	14.906	14.9534	14.7803
GCSH	+	+						+	+	aminomethyltransferase activity;catalytic activity;methyltransferase activity;transferase activity;transferase activity, transferring one-carbon groups	amine metabolic process;catabolic process;cellular amino acid metabolic process;cellular ketone metabolic process;cellular metabolic process;cellular nitrogen compound metabolic process;cellular process;metabolic process;nitrogen compound metabolic process;organic acid metabolic process;primary metabolic process;small molecule metabolic process	cell part;glycine cleavage complex;intracellular membrane-bounded organelle;intracellular organelle;macromolecular complex;mitochondrion;organelle;protein complex	Completeproteome;Lipoyl;Mitochondrion;Polymorphism;Referenceproteome;Transitpeptide	3	1.57727	0.0167762	-1.54924	-1.06748	1.91978	0.0290449	-1.67437	-1.21005	0.150449	0.900408	-0.125121	-0.095506	0.0142468	0.990227	0.0134703	0.0101949	0.0356643	0.953404	-0.0490901	-0.0334875	2.8841	0.0574196	-1.6118	-1.22831	1.43534	0.0191672	-1.59833	-1.05302	>sp|P23434|GCSH_HUMAN Glycine cleavage system H protein, mitochondrial OS=Homo sapiens GN=GCSH PE=1 SV=2	P23434	Glycine cleavage system H protein, mitochondrial	GCSH_HUMAN	14.3682	14.8181	15.5905
GEMIN2	+	+						+	+		cellular component assembly;cellular component organization;cellular macromolecular complex assembly;cellular metabolic process;cellular nitrogen compound metabolic process;cellular process;macromolecular complex assembly;macromolecule metabolic process;metabolic process;mRNA metabolic process;mRNA processing;nitrogen compound metabolic process;nucleobase-containing compound metabolic process;pri…	cell part;cytoplasm;cytosol;intracellular membrane-bounded organelle;intracellular non-membrane-bounded organelle;intracellular organelle;macromolecular complex;nucleolus;nucleoplasm;nucleus;organelle;protein complex;ribonucleoprotein complex;spliceosomal complex	3D-structure;Alternativesplicing;Completeproteome;Cytoplasm;mRNAprocessing;mRNAsplicing;Nucleus;Phosphoprotein;Referenceproteome	2	3.16183	0.00450909	-4.32307	-2.96976	3.13153	0.00689231	-4.09449	-2.84442	0.605304	0.780377	0.228573	0.195491	0.156784	0.94046	-0.0595479	-0.0519287	0.114535	0.933803	0.0547387	0.0466449	5.53509	0.0336	-4.20878	-3.20683	3.19483	0	-4.26833	-2.96174	>sp|O14893|GEMI2_HUMAN Gem-associated protein 2 OS=Homo sapiens GN=GEMIN2 PE=1 SV=1	O14893	Gem-associated protein 2	GEMI2_HUMAN	9.3966	9.81057	10.8471
GEMIN5	+	+						+	+	binding;nucleic acid binding;RNA binding;snRNA binding	cellular component assembly;cellular component organization;cellular macromolecular complex assembly;cellular metabolic process;cellular nitrogen compound metabolic process;cellular process;macromolecular complex assembly;macromolecule metabolic process;metabolic process;mRNA metabolic process;mRNA processing;nitrogen compound metabolic process;nucleobase-containing compound metabolic process;pri…	cell part;cytoplasm;cytosol;intracellular membrane-bounded organelle;intracellular organelle;macromolecular complex;membrane;nucleoplasm;nucleus;organelle;protein complex	Coiledcoil;Completeproteome;Cytoplasm;Directproteinsequencing;mRNAprocessing;mRNAsplicing;Nucleus;Phosphoprotein;Polymorphism;Referenceproteome;Repeat;RNA-binding;WDrepeat	9	3.38758	0.00158974	2.86872	2.26879	3.03705	0.00468712	3.12345	2.30552	0.288067	0.786762	0.254731	0.18769	1.76091	0.519245	-0.807073	-0.640324	1.41232	0.295763	-0.679708	-0.555242	4.90443	0.0407442	2.99609	2.3478	3.23963	0.00371831	2.18902	1.79385	>sp|Q8TEQ6|GEMI5_HUMAN Gem-associated protein 5 OS=Homo sapiens GN=GEMIN5 PE=1 SV=3	Q8TEQ6	Gem-associated protein 5	GEMI5_HUMAN	19.9334	20.3856	19.7676
GFM1	+	+						+	+	binding;catalytic activity;GTP binding;GTPase activity;guanyl nucleotide binding;guanyl ribonucleotide binding;hydrolase activity;hydrolase activity, acting on acid anhydrides;hydrolase activity, acting on acid anhydrides, in phosphorus-containing anhydrides;nucleic acid binding;nucleoside-triphosphatase activity;nucleotide binding;purine nucleotide binding;purine ribonucleoside triphosphate bind…	biosynthetic process;cellular component organization;cellular metabolic process;cellular process;macromolecule metabolic process;metabolic process;mitochondrial translation;mitochondrion organization;organelle organization;primary metabolic process;protein metabolic process;translation;translational elongation	cell part	Acetylation;Alternativesplicing;Completeproteome;Elongationfactor;GTP-binding;Mitochondrion;Nucleotide-binding;Phosphoprotein;Polymorphism;Proteinbiosynthesis;Referenceproteome;Transitpeptide	10	2.49781	0.00736807	-1.84808	-1.43072	5.52317	0.00764029	-1.99587	-1.89519	0.195356	0.881203	-0.147793	-0.114521	0.502576	0.778279	0.258073	0.20844	0.200013	0.789665	0.184176	0.13596	4.58238	0.0319162	-1.92198	-1.60411	2.86075	0.00660501	-1.6639	-1.37491	>sp|Q96RP9|EFGM_HUMAN Elongation factor G, mitochondrial OS=Homo sapiens GN=GFM1 PE=1 SV=2	Q96RP9	Elongation factor G, mitochondrial	EFGM_HUMAN	18.4834	18.5911	18.6215
GINS4	+	+						+	+		cell cycle;cell proliferation;cellular metabolic process;cellular nitrogen compound metabolic process;cellular process;DNA geometric change;DNA metabolic process;DNA recombination;DNA repair;macromolecule metabolic process;metabolic process;mitotic cell cycle;nitrogen compound metabolic process;nucleobase-containing compound metabolic process;primary metabolic process;response to DNA damage stimu…	cell part;cytoplasm;macromolecular complex;nucleoplasm;protein complex	3D-structure;Acetylation;Alternativesplicing;Completeproteome;Cytoplasm;DNAreplication;Nucleus;Phosphoprotein;Referenceproteome	2	2.37244	0.00475147	-2.04201	-1.51409	2.55278	0.0125636	-2.20014	-1.64728	0.632888	0.847368	-0.158126	-0.142125	1.91614	0.636469	-0.453628	-0.39963	1.34181	0.378512	-0.532691	-0.449272	4.36895	0.028961	-2.12108	-1.71641	2.66423	0.00391011	-2.57471	-1.88393	>sp|Q9BRT9|SLD5_HUMAN DNA replication complex GINS protein SLD5 OS=Homo sapiens GN=GINS4 PE=1 SV=1	Q9BRT9	DNA replication complex GINS protein SLD5	SLD5_HUMAN	12.2758	13.3386	13.1943
GJA1	+	+						+	+	channel activity;gap junction channel activity;ion transmembrane transporter activity;molecular transducer activity;passive transmembrane transporter activity;signal transducer activity;substrate-specific transmembrane transporter activity;substrate-specific transporter activity;transmembrane transporter activity;transporter activity;wide pore channel activity	anatomical structure development;anatomical structure morphogenesis;biological regulation;cell communication;cell death;cell differentiation;cell junction organization;cell maturation;cell motility;cell-cell signaling;cellular component assembly;cellular component morphogenesis;cellular component movement;cellular component organization;cellular homeostasis;cellular ion homeostasis;cellular proce…	cell part;cytosol;endosome;extracellular organelle;Golgi apparatus;intracellular membrane-bounded organelle;intracellular non-membrane-bounded organelle;intracellular organelle;lysosome;macromolecular complex;membrane;organelle;plasma membrane;protein complex;vacuole;vesicle	3D-structure;Cataract;Celljunction;Cellmembrane;Completeproteome;Diseasemutation;Disulfidebond;Gapjunction;Isopeptidebond;Membrane;Phosphoprotein;Polymorphism;Referenceproteome;S-nitrosylation;Transmembrane;Transmembranehelix;Ublconjugation	9	1.23897	0.00909179	-2.4004	-1.25687	1.40842	0.00841667	-4.95869	-1.87808	0.612729	0.16547	-2.55829	-0.890167	0.0426149	0.910451	-0.277268	-0.08459	0.217056	0.414044	-1.55641	-0.410691	1.37232	0.0357077	-3.67955	-1.48021	0.68176	0.0168733	-3.95681	-1.08749	>sp|P17302|CXA1_HUMAN Gap junction alpha-1 protein OS=Homo sapiens GN=GJA1 PE=1 SV=2	P17302	Gap junction alpha-1 protein	CXA1_HUMAN	17.3559	17.192	17.3737
GLMN	+	+						+	+	binding;enzyme binding;enzyme inhibitor activity;enzyme regulator activity;growth factor receptor binding;hepatocyte growth factor receptor binding;ligase inhibitor activity;ligase regulator activity;protein binding;receptor binding;ubiquitin protein ligase binding;ubiquitin-protein ligase inhibitor activity;ubiquitin-protein ligase regulator activity	anatomical structure formation involved in morphogenesis;biological regulation;cell differentiation;cellular process;developmental process;regulation of gene expression, epigenetic;regulation of protein modification process;regulation of transport	cell part;intracellular;macromolecular complex;protein complex;ubiquitin ligase complex	3D-structure;Acetylation;Alternativesplicing;Coiledcoil;Completeproteome;Diseasemutation;Phosphoprotein;Polymorphism;Referenceproteome	3	3.12109	0.00178417	3.15194	2.35144	3.09645	0.00556701	3.7015	2.63317	1.06458	0.518567	0.549567	0.442268	0.612781	0.690229	0.428091	0.320313	0.892205	0.316976	0.702874	0.514078	4.82919	0.0405	3.42672	2.58784	2.84867	0.00225	3.85481	2.58619	>sp|Q92990|GLMN_HUMAN Glomulin OS=Homo sapiens GN=GLMN PE=1 SV=2	Q92990	Glomulin	GLMN_HUMAN	18.3143	17.1625	17.7876
GLRX	+	+						+	+	binding;catalytic activity;disulfide oxidoreductase activity;electron carrier activity;glutathione disulfide oxidoreductase activity;oxidoreductase activity;oxidoreductase activity, acting on a sulfur group of donors;peptide disulfide oxidoreductase activity;protein binding;protein N-terminus binding	biological regulation;cellular homeostasis;cellular ion homeostasis;cellular metabolic process;cellular nitrogen compound metabolic process;cellular process;homeostatic process;macromolecule metabolic process;macromolecule modification;metabolic process;nitrogen compound metabolic process;nucleobase-containing compound metabolic process;nucleobase-containing small molecule interconversion;nucleob…	cell part;cytosol;extracellular organelle;intracellular membrane-bounded organelle;intracellular organelle;mitochondrion;nucleus;organelle;vesicle	3D-structure;Acetylation;Completeproteome;Cytoplasm;Directproteinsequencing;Disulfidebond;Electrontransport;Polymorphism;Redox-activecenter;Referenceproteome;Transport	3	3.48545	0.00230189	2.1428	1.80611	2.2571	0.0100749	2.65722	1.78554	0.423952	0.632346	0.514428	0.338919	1.39726	0.50577	-0.992316	-0.711617	1.38824	0.27061	-0.735102	-0.589489	3.40063	0.0283537	2.40001	1.73924	2.87223	0.00964354	1.40769	1.19641	>sp|P35754|GLRX1_HUMAN Glutaredoxin-1 OS=Homo sapiens GN=GLRX PE=1 SV=2	P35754	Glutaredoxin-1	GLRX1_HUMAN	15.8672	16.0265	15.8913
GLS	+	+						+	+	catalytic activity;glutaminase activity;hydrolase activity;hydrolase activity, acting on carbon-nitrogen (but not peptide) bonds;hydrolase activity, acting on carbon-nitrogen (but not peptide) bonds, in linear amides	amine metabolic process;behavior;behavioral interaction between organisms;biological regulation;biosynthetic process;catabolic process;cell communication;cell-cell signaling;cellular amino acid metabolic process;cellular component assembly;cellular component organization;cellular ketone metabolic process;cellular metabolic process;cellular nitrogen compound metabolic process;cellular process;esta…	cell part;cytosol;intracellular membrane-bounded organelle;intracellular organelle;mitochondrion;organelle	3D-structure;Acetylation;Alternativesplicing;ANKrepeat;Completeproteome;Cytoplasm;Directproteinsequencing;Hydrolase;Mitochondrion;Polymorphism;Referenceproteome;Repeat;Transitpeptide	13	2.39335	0.0104673	1.51309	1.20567	1.74261	0.0305841	1.72255	1.19141	0.153406	0.851374	0.20946	0.138702	0.740223	0.654358	0.510258	0.379576	1.104	0.344331	0.614988	0.487334	2.67109	0.0614072	1.61782	1.2055	4.83386	0.00446154	2.12808	1.96253	>sp|O94925|GLSK_HUMAN Glutaminase kidney isoform, mitochondrial OS=Homo sapiens GN=GLS PE=1 SV=1	O94925	Glutaminase kidney isoform, mitochondrial	GLSK_HUMAN	18.9015	18.7752	18.7762
GLYR1	+	+						+	+	binding;catalytic activity;coenzyme binding;cofactor binding;DNA binding;histone binding;methylated histone residue binding;NAD binding;nucleic acid binding;nucleotide binding;oxidoreductase activity;oxidoreductase activity, acting on CH-OH group of donors;oxidoreductase activity, acting on the CH-OH group of donors, NAD or NADP as acceptor;phosphogluconate dehydrogenase (decarboxylating) activit…	alcohol metabolic process;carbohydrate metabolic process;catabolic process;cellular metabolic process;cellular nitrogen compound metabolic process;cellular process;cofactor metabolic process;heterocycle metabolic process;metabolic process;nitrogen compound metabolic process;nucleobase-containing compound metabolic process;nucleobase-containing small molecule metabolic process;nucleotide metabolic…	cell part;cytoplasm;Golgi apparatus;intracellular membrane-bounded organelle;intracellular organelle;nucleoplasm;organelle	3D-structure;Alternativesplicing;Completeproteome;DNA-binding;NAD;Nucleus;Oxidoreductase;Phosphoprotein;Polymorphism;Referenceproteome	5	1.45157	0.0252684	-1.35972	-0.947474	2.74908	0.0252768	-1.52424	-1.2638	0.126634	0.88553	-0.164522	-0.111458	0.592201	0.683364	0.452041	0.331108	0.29076	0.614498	0.36978	0.24418	2.57085	0.0838878	-1.44198	-1.09405	1.60057	0.0658612	-0.98994	-0.77127	>sp|Q49A26|GLYR1_HUMAN Putative oxidoreductase GLYR1 OS=Homo sapiens GN=GLYR1 PE=1 SV=3	Q49A26	Putative oxidoreductase GLYR1	GLYR1_HUMAN	14.4546	14.3529	14.5273
GNA11	+	+						+	+	binding;catalytic activity;cation binding;G-protein beta/gamma-subunit complex binding;G-protein-coupled receptor binding;GTP binding;GTPase activity;guanyl nucleotide binding;guanyl ribonucleotide binding;hydrolase activity;hydrolase activity, acting on acid anhydrides;hydrolase activity, acting on acid anhydrides, in phosphorus-containing anhydrides;ion binding;metabotropic serotonin receptor b…	anatomical structure development;biological regulation;cell activation;cellular homeostasis;cellular ion homeostasis;cellular process;coagulation;developmental process;homeostatic process;metabolic process;multicellular organismal process;pigmentation;regulation of body fluid levels;response to abiotic stimulus;response to stimulus;signal transduction	cell part;cytoplasm;extracellular organelle;macromolecular complex;membrane;organelle;plasma membrane;protein complex;vesicle	ADP-ribosylation;Cellmembrane;Completeproteome;Cytoplasm;Directproteinsequencing;Diseasemutation;GTP-binding;Lipoprotein;Magnesium;Membrane;Metal-binding;Nucleotide-binding;Palmitate;Referenceproteome;Transducer	3	3.66095	0.00888832	1.43358	1.28864	3.49645	0.00798312	2.42989	2.00814	2.14587	0.197296	0.996315	0.832593	0.304748	0.755362	-0.343433	-0.232363	0.112165	0.84689	0.154725	0.103156	3.00785	0.0374276	1.93174	1.42448	1.45915	0.0189201	1.5883	1.05513	>sp|P29992|GNA11_HUMAN Guanine nucleotide-binding protein subunit alpha-11 OS=Homo sapiens GN=GNA11 PE=1 SV=2	P29992	Guanine nucleotide-binding protein subunit alpha-11	GNA11_HUMAN	17.6126	17.4791	17.285
GNAI2	+	+						+	+	binding;catalytic activity;cation binding;G-protein beta/gamma-subunit complex binding;G-protein-coupled receptor binding;GTP binding;GTPase activity;guanyl nucleotide binding;guanyl ribonucleotide binding;hydrolase activity;hydrolase activity, acting on acid anhydrides;hydrolase activity, acting on acid anhydrides, in phosphorus-containing anhydrides;ion binding;metal ion binding;molecular trans…	biological regulation;cell activation;cell communication;cell cycle;cell division;cell proliferation;cell-cell signaling;cellular metabolic process;cellular process;coagulation;macromolecule metabolic process;macromolecule modification;metabolic process;multicellular organismal process;phosphorus metabolic process;primary metabolic process;protein metabolic process;protein modification process;pr…	cell part;centrosome;cytoplasm;cytosol;extracellular organelle;intracellular non-membrane-bounded organelle;intracellular organelle;macromolecular complex;membrane;microtubule organizing center;midbody;nucleoplasm;organelle;plasma membrane;protein complex;vesicle	ADP-ribosylation;Alternativesplicing;Cellcycle;Celldivision;Cellmembrane;Completeproteome;Cytoplasm;Cytoskeleton;GTP-binding;Lipoprotein;Magnesium;Membrane;Metal-binding;Myristate;Nucleotide-binding;Palmitate;Referenceproteome;Transducer	10	2.4599	0.0254261	1.11757	0.94659	4.42599	0.0204662	1.45086	1.35235	0.935795	0.685317	0.33329	0.285711	1.67857	0.614805	-0.506427	-0.432543	0.782549	0.562835	-0.339782	-0.283091	4.02933	0.0819485	1.28421	1.10598	2.37064	0.0883522	0.777788	0.686511	>sp|P04899|GNAI2_HUMAN Guanine nucleotide-binding protein G(i) subunit alpha-2 OS=Homo sapiens GN=GNAI2 PE=1 SV=3	P04899	Guanine nucleotide-binding protein G(i) subunit alpha-2	GNAI2_HUMAN	21.1941	21.0623	20.9469
GNAS	+	+						+	+	adrenergic receptor binding;beta-2 adrenergic receptor binding;binding;catalytic activity;cation binding;corticotropin-releasing hormone receptor 1 binding;corticotropin-releasing hormone receptor binding;D1 dopamine receptor binding;dopamine receptor binding;glutamate receptor binding;G-protein beta/gamma-subunit complex binding;G-protein-coupled receptor binding;GTP binding;GTPase activity;guan…	anatomical structure development;anatomical structure formation involved in morphogenesis;anatomical structure morphogenesis;biological adhesion;biological regulation;cell adhesion;cellular metabolic process;cellular nitrogen compound metabolic process;cellular process;developmental process;DNA metabolic process;DNA modification;energy reserve metabolic process;generation of precursor metabolites…	cell part;cell projection;cytosol;extracellular organelle;macromolecular complex;membrane;neuron projection;organelle;protein complex;vesicle	ADP-ribosylation;Alternativesplicing;Cellmembrane;Coiledcoil;Completeproteome;Cushingsyndrome;Diseasemutation;GTP-binding;Magnesium;Membrane;Metal-binding;Nucleotide-binding;Phosphoprotein;Polymorphism;Referenceproteome;Transducer	2	1.74429	0.00624549	2.38682	1.47607	1.061	0.0768033	1.52024	0.908504	1.19587	0.335181	-0.866584	-0.646406	2.26594	0.331353	1.51547	1.09648	1.95556	0.132823	1.08218	0.87124	2.0962	0.0514879	1.95353	1.27434	2.27704	0.00198291	3.469	2.12917	>sp|Q5JWF2|GNAS1_HUMAN Guanine nucleotide-binding protein G(s) subunit alpha isoforms XLas OS=Homo sapiens GN=GNAS PE=1 SV=2	Q5JWF2	Guanine nucleotide-binding protein G(s) subunit alpha isoforms XLas	GNAS1_HUMAN	16.4422	17.0902	15.0585
GNB2	+	+						+		binding;calcium channel regulator activity;catalytic activity;channel regulator activity;enzyme binding;GTPase activity;GTPase binding;hydrolase activity;hydrolase activity, acting on acid anhydrides;hydrolase activity, acting on acid anhydrides, in phosphorus-containing anhydrides;molecular transducer activity;nucleoside-triphosphatase activity;protein binding;protein complex binding;pyrophospha…	biological regulation;cell communication;cell-cell signaling;cellular metabolic process;cellular process;energy reserve metabolic process;generation of precursor metabolites and energy;metabolic process;response to chemical stimulus;response to endogenous stimulus;response to stimulus;signal transduction;signaling;small molecule metabolic process	cell body;cell part;extracellular organelle;extracellular space;macromolecular complex;membrane;organelle;plasma membrane;protein complex;vesicle	Acetylation;Alternativesplicing;Completeproteome;Cytoplasm;Directproteinsequencing;Phosphoprotein;Referenceproteome;Repeat;Transducer;WDrepeat	5	3.49008	0.0205179	1.1022	1.006	4.00231	0.0398099	1.18558	1.10167	0.274886	0.92743	0.0833747	0.0743269	4.2744	0.41435	-0.956276	-0.861572	2.50262	0.155063	-0.914589	-0.799513	5.55318	0.0949787	1.14389	1.05486	0.801745	0.735564	0.187615	0.169302	>sp|P62879|GBB2_HUMAN Guanine nucleotide-binding protein G(I)/G(S)/G(T) subunit beta-2 OS=Homo sapiens GN=GNB2 PE=1 SV=3	P62879	Guanine nucleotide-binding protein G(I)/G(S)/G(T) subunit beta-2	GBB2_HUMAN	19.6518	19.63	19.6557
GNG12	+	+						+	+	anion binding;binding;ion binding;molecular transducer activity;PDZ domain binding;phosphate ion binding;protein binding;protein domain specific binding;signal transducer activity	anatomical structure development;biological regulation;cell communication;cell-cell signaling;cellular metabolic process;cellular process;developmental process;energy reserve metabolic process;generation of precursor metabolites and energy;metabolic process;response to biotic stimulus;response to chemical stimulus;response to endogenous stimulus;response to stimulus;signal transduction;signaling;…	cell part;extracellular organelle;macromolecular complex;membrane;organelle;plasma membrane;protein complex;vesicle	Acetylation;Cellmembrane;Completeproteome;Lipoprotein;Membrane;Methylation;Phosphoprotein;Prenylation;Referenceproteome;Transducer	3	3.47209	0.00297561	2.37747	1.96734	2.50333	0.011802	2.30163	1.68981	0.0714574	0.948787	-0.0758473	-0.0552929	0.74348	0.659475	-0.496067	-0.371998	0.631276	0.434392	-0.533991	-0.386652	4.36882	0.0287857	2.33955	1.8567	2.11334	0.00715789	1.84348	1.34401	>sp|Q9UBI6|GBG12_HUMAN Guanine nucleotide-binding protein G(I)/G(S)/G(O) subunit gamma-12 OS=Homo sapiens GN=GNG12 PE=1 SV=3	Q9UBI6	Guanine nucleotide-binding protein G(I)/G(S)/G(O) subunit gamma-12	GBG12_HUMAN	17.7682	17.3734	17.3547
GNL3L	+	+						+	+	binding;catalytic activity;GTP binding;GTPase activity;guanyl nucleotide binding;guanyl ribonucleotide binding;hydrolase activity;hydrolase activity, acting on acid anhydrides;hydrolase activity, acting on acid anhydrides, in phosphorus-containing anhydrides;nucleoside-triphosphatase activity;nucleotide binding;purine nucleotide binding;purine ribonucleoside triphosphate binding;purine ribonucleo…	cellular process;metabolic process;ribosome biogenesis	cell part;cytoplasm;intracellular membrane-bounded organelle;intracellular non-membrane-bounded organelle;intracellular organelle;membrane;mitochondrion;nucleolus;nucleoplasm;nucleus;organelle	Coiledcoil;Completeproteome;GTP-binding;Nucleotide-binding;Nucleus;Polymorphism;Referenceproteome;Ribosomebiogenesis	2	4.05493	0.0016	-2.64324	-2.26949	3.65482	0.00529412	-3.27921	-2.60626	1.0624	0.465022	-0.635967	-0.496338	1.37941	0.556756	0.695684	0.543646	1.19601	0.509166	0.3777	0.328881	4.79439	0.0402609	-2.96122	-2.30709	4.68674	0.00248175	-2.26554	-2.06373	>sp|Q9NVN8|GNL3L_HUMAN Guanine nucleotide-binding protein-like 3-like protein OS=Homo sapiens GN=GNL3L PE=1 SV=1	Q9NVN8	Guanine nucleotide-binding protein-like 3-like protein	GNL3L_HUMAN	13.8863	14.0771	13.7852
GOLGA4		+	+			+		+	+	binding;enzyme binding;GTPase binding;protein binding	biological regulation;cellular process;establishment of localization;Golgi vesicle transport;protein targeting;protein transport;transport;vesicle-mediated transport	cell part;cytoplasm;extracellular organelle;Golgi apparatus;intracellular membrane-bounded organelle;intracellular organelle;membrane;nucleoplasm;organelle;vesicle	3D-structure;Alternativesplicing;Coiledcoil;Completeproteome;Cytoplasm;Glycoprotein;Golgiapparatus;Membrane;Phosphoprotein;Polymorphism;Referenceproteome	9	0.226046	0.801103	-0.158197	-0.124204	2.85951	0.0187368	-7.31077	-3.79935	2.78683	0	-7.15257	-3.67734	0.22997	0.63701	-1.3857	-0.402003	2.96734	0	-4.96199	-3.12522	0.776812	0.0845033	-3.73448	-1.09094	3.11924	0	-5.12018	-3.29564	>sp|Q13439|GOGA4_HUMAN Golgin subfamily A member 4 OS=Homo sapiens GN=GOLGA4 PE=1 SV=1	Q13439	Golgin subfamily A member 4	GOGA4_HUMAN	20.2447	19.8246	20.2066
GOLM1	+	+						+	+		biological regulation;cellular component organization;cellular process;nucleus organization;organelle organization	cell part;extracellular organelle;extracellular space;Golgi apparatus;intracellular membrane-bounded organelle;intracellular organelle;organelle;vesicle	Alternativeinitiation;Coiledcoil;Completeproteome;Glycoprotein;Golgiapparatus;Membrane;Phosphoprotein;Polymorphism;Referenceproteome;Signal-anchor;Transmembrane;Transmembranehelix	7	2.40917	0.00281297	-2.29876	-1.6615	2.55029	0.0116122	-2.31427	-1.70974	0.0320177	0.990695	-0.0155176	-0.0133376	4.04444	0.432926	0.918453	0.823996	2.249	0.169291	0.910694	0.77958	4.40525	0.0280345	-2.30651	-1.84064	1.75641	0.0230753	-1.38806	-1.0238	>sp|Q8NBJ4|GOLM1_HUMAN Golgi membrane protein 1 OS=Homo sapiens GN=GOLM1 PE=1 SV=1	Q8NBJ4	Golgi membrane protein 1	GOLM1_HUMAN	14.6097	15.2313	15.823
GOLT1B	+	+						+	+	catalytic activity;hydrolase activity;hydrolase activity, acting on ester bonds;lipase activity;molecular transducer activity;signal transducer activity	biological regulation;cellular process;establishment of localization;lipid metabolic process;metabolic process;primary metabolic process;protein transport;response to stimulus;signal transduction;transport;vesicle-mediated transport	cell part;endoplasmic reticulum;intracellular membrane-bounded organelle;intracellular organelle;membrane;organelle	Acetylation;Completeproteome;Golgiapparatus;Membrane;Proteintransport;Referenceproteome;Transmembrane;Transmembranehelix;Transport	3	3.22825	0.0288456	1.01087	0.916959	2.67842	0.0214888	1.65069	1.33872	1.35347	0.435303	0.639812	0.524024	0.237705	0.84048	0.210081	0.154399	0.603367	0.442016	0.529987	0.380335	2.85188	0.0949954	1.33078	1.0552	1.73693	0.0154873	1.54086	1.10032	>sp|Q9Y3E0|GOT1B_HUMAN Vesicle transport protein GOT1B OS=Homo sapiens GN=GOLT1B PE=1 SV=1	Q9Y3E0	Vesicle transport protein GOT1B	GOT1B_HUMAN	16.1281	15.9086	15.8293
GPATCH8	+	+						+	+	binding;cation binding;ion binding;metal ion binding			Acetylation;Alternativesplicing;Coiledcoil;Completeproteome;Metal-binding;Phosphoprotein;Polymorphism;Referenceproteome;Zinc;Zinc-finger	4	3.3056	0.00481002	-1.81907	-1.54679	3.03435	0.0145832	-1.87867	-1.54785	0.115528	0.95493	-0.0596078	-0.0501972	0.963754	0.740768	-0.291014	-0.251231	0.821846	0.575301	-0.320818	-0.271688	5.16017	0.0322083	-1.84887	-1.59935	3.29858	0.00358371	-2.13988	-1.77153	>sp|Q9UKJ3|GPTC8_HUMAN G patch domain-containing protein 8 OS=Homo sapiens GN=GPATCH8 PE=1 SV=2	Q9UKJ3	G patch domain-containing protein 8	GPTC8_HUMAN	16.2549	15.9143	15.7687
GPC3	+	+						+	+	enzyme inhibitor activity;enzyme regulator activity;peptidase inhibitor activity;peptidase regulator activity;peptidyl-dipeptidase inhibitor activity	amine metabolic process;anatomical structure development;anatomical structure morphogenesis;biological regulation;biosynthetic process;carbohydrate metabolic process;catabolic process;cell differentiation;cell proliferation;cellular lipid metabolic process;cellular metabolic process;cellular process;detection of stimulus;developmental process;lipid metabolic process;macromolecule metabolic proces…	cell part;extracellular matrix;extracellular organelle;extracellular space;membrane;organelle;plasma membrane;proteinaceous extracellular matrix;vesicle	Alternativesplicing;Cellmembrane;Completeproteome;Diseasemutation;Glycoprotein;GPI-anchor;Heparansulfate;Lipoprotein;Membrane;Proteaseinhibitor;Proteoglycan;Referenceproteome;Secreted;Signal	3	2.07334	0.012254	-1.50002	-1.1447	2.45509	0.0171382	-1.87827	-1.43985	0.925622	0.648702	-0.378249	-0.317603	1.02918	0.50437	-1.1379	-0.717251	0.698316	0.198237	-1.32703	-0.711068	3.55481	0.0425393	-1.68915	-1.34883	1.46105	0.0061256	-2.82705	-1.48939	>sp|P51654|GPC3_HUMAN Glypican-3 OS=Homo sapiens GN=GPC3 PE=1 SV=1	P51654	Glypican-3	GPC3_HUMAN	15.9439	15.2573	15.0234
GRSF1	+	+						+	+	binding;mRNA binding;nucleic acid binding;nucleotide binding;RNA binding	anatomical structure morphogenesis;cellular metabolic process;cellular nitrogen compound metabolic process;cellular process;developmental process;macromolecule metabolic process;metabolic process;mRNA metabolic process;mRNA processing;nitrogen compound metabolic process;nucleobase-containing compound metabolic process;primary metabolic process;RNA metabolic process;RNA processing;tRNA metabolic p…	cell part;cytoplasm;intracellular membrane-bounded organelle;intracellular non-membrane-bounded organelle;intracellular organelle;mitochondrion;organelle	3D-structure;Alternativesplicing;Completeproteome;Cytoplasm;Directproteinsequencing;Mitochondrion;Mitochondrionnucleoid;mRNAprocessing;Phosphoprotein;Polymorphism;Referenceproteome;Repeat;RNA-binding;Transitpeptide;tRNAprocessing	15	1.91569	0.0239283	-1.23752	-0.963507	2.89152	0.0374942	-1.29798	-1.11804	0.0644365	0.959123	-0.0604623	-0.0455791	0.806872	0.683718	0.418403	0.331212	0.455589	0.562313	0.388172	0.283882	3.2236	0.0970678	-1.26775	-1.04362	1.66096	0.087483	-0.849344	-0.688905	>sp|Q12849|GRSF1_HUMAN G-rich sequence factor 1 OS=Homo sapiens GN=GRSF1 PE=1 SV=3	Q12849	G-rich sequence factor 1	GRSF1_HUMAN	17.4152	17.4166	17.4419
GSN	+	+						+	+	actin binding;binding;calcium ion binding;cation binding;cytoskeletal protein binding;ion binding;metal ion binding;myosin binding;myosin II binding;protein binding;protein domain specific binding	aging;anatomical structure development;anatomical structure morphogenesis;biological regulation;cell death;cell development;cellular component assembly;cellular component disassembly;cellular component morphogenesis;cellular component organization;cellular macromolecular complex assembly;cellular membrane organization;cellular process;cytoskeleton organization;death;developmental process;growth;m…	cell part;cell projection;cytoplasm;cytoskeleton;cytosol;extracellular organelle;extracellular region;extracellular space;intracellular non-membrane-bounded organelle;intracellular organelle;macromolecular complex;membrane;organelle;plasma membrane;protein complex;vesicle	3D-structure;Acetylation;Actin-binding;Actincapping;Alternativeinitiation;Alternativesplicing;Amyloid;Amyloidosis;Calcium;Ciliumbiogenesis/degradation;Completeproteome;Cornealdystrophy;Cytoplasm;Cytoskeleton;Directproteinsequencing;Diseasemutation;Disulfidebond;Metal-binding;Phosphoprotein;Polymorphism;Referenceproteome;Repeat;Secreted;Signal	34	3.18822	0.00512	1.88086	1.57372	1.71675	0.0359879	1.61039	1.13056	0.229593	0.790656	-0.270465	-0.185046	0.0755683	0.935587	0.0844784	0.0601727	0.0401377	0.94992	-0.0507539	-0.0354935	3.04858	0.0436499	1.74563	1.32582	2.02966	0.00746988	1.8301	1.31685	>sp|P06396|GELS_HUMAN Gelsolin OS=Homo sapiens GN=GSN PE=1 SV=1	P06396	Gelsolin	GELS_HUMAN	23.0069	22.9217	22.8313
GSTK1	+	+						+	+	antioxidant activity;binding;catalytic activity;disulfide oxidoreductase activity;glutathione peroxidase activity;glutathione transferase activity;oxidoreductase activity;oxidoreductase activity, acting on a sulfur group of donors;oxidoreductase activity, acting on peroxide as acceptor;peroxidase activity;protein binding;protein disulfide oxidoreductase activity;receptor binding;transferase activ…	amine metabolic process;cell differentiation;cellular amino acid metabolic process;cellular ketone metabolic process;cellular metabolic process;cellular nitrogen compound metabolic process;cellular process;developmental process;metabolic process;nitrogen compound metabolic process;organic acid metabolic process;peptide metabolic process;primary metabolic process;small molecule metabolic process;s…	cell part;extracellular organelle;intracellular;intracellular membrane-bounded organelle;intracellular organelle;membrane;microbody;organelle;peroxisome;vesicle	3D-structure;Acetylation;Alternativesplicing;Completeproteome;Peroxisome;Referenceproteome;Transferase	4	2.00878	0.0071634	2.03775	1.41508	1.39573	0.0216883	2.39548	1.33063	0.145871	0.787219	0.357738	0.187156	0.339239	0.69733	-0.497739	-0.304685	0.244223	0.664273	-0.31887	-0.21037	2.08269	0.0391071	2.21662	1.37794	2.47533	0.00688235	1.71888	1.34798	>sp|Q9Y2Q3|GSTK1_HUMAN Glutathione S-transferase kappa 1 OS=Homo sapiens GN=GSTK1 PE=1 SV=3	Q9Y2Q3	Glutathione S-transferase kappa 1	GSTK1_HUMAN	16.6669	16.7746	16.7999
GSTO1	+	+						+	+	antioxidant activity;catalytic activity;disulfide oxidoreductase activity;glutathione dehydrogenase (ascorbate) activity;glutathione disulfide oxidoreductase activity;glutathione transferase activity;methylarsonate reductase activity;oxidoreductase activity;oxidoreductase activity, acting on a sulfur group of donors;oxidoreductase activity, acting on a sulfur group of donors, quinone or similar c…	biological regulation;catabolic process;cellular ketone metabolic process;cellular metabolic process;cellular process;metabolic process;organic acid metabolic process;regulation of transport;response to chemical stimulus;response to stimulus;signal transduction;small molecule metabolic process;vitamin metabolic process;xenobiotic metabolic process	cell part;cytoplasm;cytosol;extracellular organelle;organelle;vesicle	3D-structure;Acetylation;Alternativesplicing;Completeproteome;Cytoplasm;Directproteinsequencing;Oxidoreductase;Phosphoprotein;Polymorphism;Referenceproteome;Transferase	11	3.96027	0.00174648	2.73531	2.31786	3.91915	0.00784452	2.16244	1.88721	1.17482	0.493095	-0.572868	-0.466023	0.0631094	0.956773	-0.0510807	-0.0396255	0.483115	0.594053	-0.337515	-0.258883	4.71919	0.0304615	2.44888	1.97379	3.2011	0.00419277	2.39779	1.923	>sp|P78417|GSTO1_HUMAN Glutathione S-transferase omega-1 OS=Homo sapiens GN=GSTO1 PE=1 SV=2	P78417	Glutathione S-transferase omega-1	GSTO1_HUMAN	20.6435	20.7071	20.6294
GTF2F1	+	+						+	+	binding;catalytic activity;DNA binding;enzyme activator activity;enzyme regulator activity;nucleic acid binding;phosphatase activator activity;phosphatase regulator activity;protein binding;protein binding transcription factor activity;transcription coactivator activity;transcription cofactor activity;transcription factor binding;transcription factor binding transcription factor activity	biological regulation;biosynthetic process;cellular metabolic process;cellular nitrogen compound metabolic process;cellular process;macromolecule metabolic process;metabolic process;mRNA metabolic process;mRNA processing;multi-organism process;nitrogen compound metabolic process;nucleobase-containing compound metabolic process;primary metabolic process;response to biotic stimulus;response to stim…	cell part;intracellular membrane-bounded organelle;intracellular organelle;macromolecular complex;nucleoplasm;nucleus;organelle;protein complex;transcription factor complex	3D-structure;Acetylation;Completeproteome;Directproteinsequencing;DNA-binding;Nucleus;Phosphoprotein;Polymorphism;Referenceproteome;Transcription;Transcriptionregulation	9	2.81906	0.0203755	-1.15907	-1.00774	2.13871	0.0524214	-1.28492	-1.02402	0.217733	0.893634	-0.125853	-0.10274	1.57858	0.636023	-0.470987	-0.403244	1.89864	0.354074	-0.533914	-0.474963	3.63919	0.0970575	-1.222	-1.03834	3.22008	0.00631579	-1.69299	-1.44408	>sp|P35269|T2FA_HUMAN General transcription factor IIF subunit 1 OS=Homo sapiens GN=GTF2F1 PE=1 SV=2	P35269	General transcription factor IIF subunit 1	T2FA_HUMAN	16.084	16.2823	16.5524
GTF2I	+	+						+	+	binding;DNA binding;nucleic acid binding;nucleic acid binding transcription factor activity;sequence-specific DNA binding transcription factor activity	biological regulation;biosynthetic process;cellular homeostasis;cellular ion homeostasis;cellular metabolic process;cellular nitrogen compound metabolic process;cellular process;homeostatic process;macromolecule metabolic process;metabolic process;nitrogen compound metabolic process;nucleobase-containing compound metabolic process;primary metabolic process;response to stimulus;RNA metabolic proce…	cell body;cell part;cell projection;cytoplasm;intracellular membrane-bounded organelle;intracellular organelle;membrane;neuronal cell body;nucleoplasm;nucleus;organelle	3D-structure;Acetylation;Alternativesplicing;Completeproteome;Cytoplasm;Directproteinsequencing;DNA-binding;Nucleus;Phosphoprotein;Polymorphism;Referenceproteome;Repeat;Transcription;Transcriptionregulation;Ublconjugation;Williams-Beurensyndrome	36	4.39083	0.00791837	-1.49562	-1.38915	3.57673	0.0233765	-1.4549	-1.29908	0.10354	0.970219	0.0407232	0.0356734	1.17165	0.76416	-0.24737	-0.221979	0.836786	0.678993	-0.227009	-0.201631	5.99015	0.0424202	-1.47526	-1.34865	4.16026	0.00442458	-1.72263	-1.56469	>sp|P78347|GTF2I_HUMAN General transcription factor II-I OS=Homo sapiens GN=GTF2I PE=1 SV=2	P78347	General transcription factor II-I	GTF2I_HUMAN	19.639	19.6554	19.6754
GYG1	+	+				+		+		binding;carbohydrate binding;catalytic activity;cation binding;glucose binding;glucosyltransferase activity;glycogenin glucosyltransferase activity;ion binding;metal ion binding;monosaccharide binding;sugar binding;transferase activity;transferase activity, transferring glycosyl groups;transferase activity, transferring hexosyl groups;UDP-glucosyltransferase activity;UDP-glycosyltransferase activ…	alcohol metabolic process;biosynthetic process;carbohydrate metabolic process;catabolic process;cellular metabolic process;cellular process;energy reserve metabolic process;generation of precursor metabolites and energy;macromolecule metabolic process;metabolic process;polysaccharide metabolic process;primary metabolic process;small molecule metabolic process	cell part;cytosol;extracellular organelle;membrane;organelle;vesicle	3D-structure;Acetylation;Alternativesplicing;Completeproteome;Diseasemutation;Glycogenbiosynthesis;Glycogenstoragedisease;Glycoprotein;Manganese;Metal-binding;Phosphoprotein;Referenceproteome;Transferase	3	2.78617	0.00921905	1.49761	1.25014	2.63529	0.0213522	1.66548	1.34157	0.293667	0.852899	0.167869	0.136311	3.49534	0.238458	-1.73694	-1.37276	2.04895	0.0411525	-1.65301	-1.22664	4.1783	0.0435806	1.58154	1.33112	0.165215	0.828635	-0.155401	-0.114748	>sp|P46976|GLYG_HUMAN Glycogenin-1 OS=Homo sapiens GN=GYG1 PE=1 SV=4	P46976	Glycogenin-1	GLYG_HUMAN	17.0226	16.7418	17.2542
HAT1	+	+						+	+	acetyltransferase activity;catalytic activity;H4 histone acetyltransferase activity;histone acetyltransferase activity;lysine N-acetyltransferase activity;N-acetyltransferase activity;N-acyltransferase activity;transferase activity;transferase activity, transferring acyl groups;transferase activity, transferring acyl groups other than amino-acyl groups	biological regulation;cellular component assembly;cellular component organization;cellular macromolecular complex assembly;cellular metabolic process;cellular nitrogen compound metabolic process;cellular process;chromatin modification;chromatin organization;chromosome organization;DNA metabolic process;DNA packaging;gene silencing;histone modification;macromolecular complex assembly;macromolecule…	cell part;cytoplasm;intracellular membrane-bounded organelle;intracellular organelle;macromolecular complex;nucleoplasm;nucleus;organelle;protein complex	3D-structure;Acetylation;Acyltransferase;Alternativesplicing;Completeproteome;Cytoplasm;Nucleus;Polymorphism;Referenceproteome;Transferase	10	2.59211	0.00816364	-1.71233	-1.36448	2.91895	0.0215497	-1.59635	-1.33621	0.168351	0.903391	0.115981	0.0920461	0.244876	0.889417	-0.133345	-0.109014	0.0879828	0.920583	-0.0753543	-0.0577735	4.20561	0.0393171	-1.65434	-1.38452	2.68882	0.00630508	-1.78768	-1.42926	>sp|O14929|HAT1_HUMAN Histone acetyltransferase type B catalytic subunit OS=Homo sapiens GN=HAT1 PE=1 SV=1	O14929	Histone acetyltransferase type B catalytic subunit	HAT1_HUMAN	16.4286	16.0462	16.016
HDAC2	+	+						+	+	binding;catalytic activity;chromatin binding;chromatin DNA binding;core promoter binding;deacetylase activity;DNA binding;enzyme binding;histone deacetylase activity;histone deacetylase activity (H3-K14 specific);histone deacetylase activity (H3-K9 specific);hydrolase activity;hydrolase activity, acting on carbon-nitrogen (but not peptide) bonds;hydrolase activity, acting on carbon-nitrogen (but …	anatomical structure development;anatomical structure formation involved in morphogenesis;anatomical structure morphogenesis;biological regulation;biosynthetic process;cell development;cell differentiation;cellular component organization;cellular metabolic process;cellular nitrogen compound metabolic process;cellular process;chromatin modification;chromatin organization;chromosome organization;co…	cell part;chromatin remodeling complex;cytoplasm;histone methyltransferase complex;intracellular membrane-bounded organelle;intracellular organelle;macromolecular complex;nucleoplasm;nucleus;organelle;PcG protein complex;protein complex;transcription factor complex;transcriptional repressor complex	3D-structure;Acetylation;Alternativesplicing;Biologicalrhythms;Chromatinregulator;Completeproteome;Cytoplasm;Hydrolase;Nucleus;Phosphoprotein;Polymorphism;Referenceproteome;Repressor;S-nitrosylation;Transcription;Transcriptionregulation	12	3.7039	0.00280851	-2.0516	-1.77327	3.23052	0.0171171	-1.69563	-1.44732	0.986057	0.665224	0.35596	0.304439	0.788715	0.697919	-0.384298	-0.308351	0.270741	0.752404	-0.206318	-0.158073	4.83446	0.0322887	-1.87361	-1.59197	2.74246	0.00323265	-2.25791	-1.7282	>sp|Q92769|HDAC2_HUMAN Histone deacetylase 2 OS=Homo sapiens GN=HDAC2 PE=1 SV=2	Q92769	Histone deacetylase 2	HDAC2_HUMAN	17.3192	17.7098	17.514
HDLBP	+	+						+		binding;lipid binding	alcohol metabolic process;establishment of localization;lipid metabolic process;lipid transport;metabolic process;primary metabolic process;small molecule metabolic process;transport	cell part;cytoplasm;intracellular membrane-bounded organelle;intracellular organelle;macromolecular complex;membrane;nucleus;organelle;plasma membrane	3D-structure;Acetylation;Alternativesplicing;Cholesterolmetabolism;Completeproteome;Cytoplasm;Directproteinsequencing;HDL;Lipidmetabolism;Lipidtransport;Nucleus;Phosphoprotein;Polymorphism;Referenceproteome;Repeat;RNA-binding;Steroidmetabolism;Sterolmetabolism;Transport	59	4.28637	0.0118697	1.22917	1.15207	4.37637	0.0330254	1.23503	1.16093	0.0214256	0.997671	0.00585365	0.00536479	0.584196	0.683381	-0.456628	-0.332572	0.329815	0.554778	-0.453701	-0.289661	6.78139	0.0687722	1.2321	1.16221	0.619535	0.209956	0.775471	0.49628	>sp|Q00341|VIGLN_HUMAN Vigilin OS=Homo sapiens GN=HDLBP PE=1 SV=2	Q00341	Vigilin	VIGLN_HUMAN	21.6241	21.622	21.5897
HEBP1	+	+						+	+	binding;cation binding;heme binding;ion binding;iron ion binding;metal ion binding;tetrapyrrole binding;transition metal ion binding	rhythmic process	cell part;cytosol;extracellular organelle;extracellular region;intracellular membrane-bounded organelle;intracellular organelle;mitochondrion;organelle;vesicle	Completeproteome;Cytoplasm;Polymorphism;Referenceproteome	7	3.10084	0.0102091	1.41486	1.22533	1.25373	0.0803194	1.35087	0.897126	0.0418605	0.963108	-0.0639925	-0.0420816	0.756322	0.647006	-0.520246	-0.386811	1.5969	0.352169	-0.552242	-0.476652	2.29456	0.0978974	1.38286	1.02876	3.01573	0.0625127	0.862617	0.784739	>sp|Q9NRV9|HEBP1_HUMAN Heme-binding protein 1 OS=Homo sapiens GN=HEBP1 PE=1 SV=1	Q9NRV9	Heme-binding protein 1	HEBP1_HUMAN	17.5556	17.7752	17.7167
HIST1H1A	+	+						+	+	binding;chromatin binding;chromatin DNA binding;DNA binding;nucleic acid binding;structure-specific DNA binding	cellular component assembly;cellular component organization;cellular macromolecular complex assembly;cellular process;chromatin organization;chromosome organization;macromolecular complex assembly;multicellular organismal process;organelle organization	cell part;macromolecular complex;nucleosome	Acetylation;Chromosome;Citrullination;Completeproteome;DNA-binding;Nucleus;Phosphoprotein;Polymorphism;Referenceproteome	5	3.11918	0.00211364	-2.8514	-2.17943	1.6442	0.0149211	-2.60011	-1.51033	0.130683	0.843111	0.251289	0.147229	0.953258	0.545675	0.859014	0.583704	2.08803	0.146282	0.984659	0.819315	3.0419	0.0284667	-2.72576	-1.82236	2.77364	0.00627723	-1.86674	-1.49503	>sp|Q02539|H11_HUMAN Histone H1.1 OS=Homo sapiens GN=HIST1H1A PE=1 SV=3	Q02539	Histone H1.1	H11_HUMAN	14.7829	13.9597	14.4917
HMGB1	+	+						+	+	binding;chemoattractant activity;chromatin binding;cytokine activity;damaged DNA binding;DNA bending activity;DNA binding;double-stranded DNA binding;nucleic acid binding;nucleic acid binding transcription factor activity;protein binding;RAGE receptor binding;receptor binding;repressing transcription factor binding;sequence-specific DNA binding transcription factor activity;single-stranded DNA bi…	biological regulation;catabolic process;cell activation;cell death;cell motility;cellular component disassembly;cellular component movement;cellular component organization;cellular metabolic process;cellular nitrogen compound metabolic process;cellular process;chromatin modification;chromatin organization;chromosome organization;death;DNA ligation;DNA metabolic process;DNA recombination;immune sy…	cell part;cell surface;chromosome;extracellular region;extracellular space;intracellular membrane-bounded organelle;intracellular non-membrane-bounded organelle;intracellular organelle;nucleoplasm;nucleus;organelle	3D-structure;Acetylation;Chromosome;Completeproteome;Directproteinsequencing;DNA-binding;Isopeptidebond;Nucleus;Phosphoprotein;Polymorphism;Referenceproteome;Repeat;Ublconjugation	6	2.76641	0.0262865	-1.07341	-0.938625	4.60912	0.0269735	-1.31597	-1.24217	0.721183	0.767761	-0.242559	-0.210217	0.631178	0.841358	-0.173052	-0.152763	0.902373	0.598584	-0.294331	-0.255458	4.45863	0.0942052	-1.19469	-1.05851	4.81194	0.0079403	-1.36774	-1.29655	>sp|P09429|HMGB1_HUMAN High mobility group protein B1 OS=Homo sapiens GN=HMGB1 PE=1 SV=3	P09429	High mobility group protein B1	HMGB1_HUMAN	19.3554	19.4091	19.3807
HMGB3	+	+						+	+	binding;chromatin binding;DNA bending activity;DNA binding;double-stranded DNA binding;nucleic acid binding;structure-specific DNA binding	biological regulation;cellular component organization;cellular metabolic process;cellular nitrogen compound metabolic process;cellular process;chromatin modification;chromatin organization;chromosome organization;developmental process;DNA metabolic process;DNA recombination;macromolecule metabolic process;metabolic process;multicellular organismal development;multicellular organismal process;nitr…	cell part;chromosome;intracellular membrane-bounded organelle;intracellular non-membrane-bounded organelle;intracellular organelle;nucleus;organelle	3D-structure;Chromosome;Completeproteome;DNA-binding;Microphthalmia;Nucleus;Polymorphism;Referenceproteome;Repeat	8	3.88448	0.00265979	-1.8971	-1.67801	4.74816	0.00872603	-2.03013	-1.87183	0.431997	0.876872	-0.133024	-0.117536	1.87429	0.675666	0.386002	0.345437	0.965473	0.569914	0.31949	0.276619	6.53859	0.0280889	-1.96361	-1.77874	3.74945	0.00644491	-1.57761	-1.41172	>sp|O15347|HMGB3_HUMAN High mobility group protein B3 OS=Homo sapiens GN=HMGB3 PE=1 SV=4	O15347	High mobility group protein B3	HMGB3_HUMAN	19.0103	19.0336	19.1962
HMGCS1	+	+						+	+	binding;catalytic activity;drug binding;hydroxymethylglutaryl-CoA synthase activity;isomerase activity;organic acid binding;transferase activity;transferase activity, transferring acyl groups;transferase activity, transferring acyl groups, acyl groups converted into alkyl on transfer	alcohol metabolic process;anatomical structure development;biosynthetic process;cellular lipid metabolic process;cellular metabolic process;cellular process;developmental process;lipid metabolic process;metabolic process;primary metabolic process;response to abiotic stimulus;response to chemical stimulus;response to drug;response to endogenous stimulus;response to external stimulus;response to ex…	cell part;cytoplasm;cytosol;intracellular membrane-bounded organelle;intracellular organelle;membrane;nucleoplasm;nucleus;organelle;plasma membrane	3D-structure;Acetylation;Cholesterolbiosynthesis;Cholesterolmetabolism;Completeproteome;Cytoplasm;Lipidbiosynthesis;Lipidmetabolism;Phosphoprotein;Referenceproteome;Steroidbiosynthesis;Steroidmetabolism;Sterolbiosynthesis;Sterolmetabolism;Transferase	21	2.45816	0.0169983	-1.28455	-1.06351	1.57861	0.0302307	-1.83631	-1.19675	0.441596	0.609838	-0.551761	-0.359136	0.372565	0.730189	-0.38109	-0.263006	0.848914	0.347828	-0.656971	-0.483261	2.19824	0.0808069	-1.56043	-1.10995	2.25779	0.00631847	-1.94152	-1.43122	>sp|Q01581|HMCS1_HUMAN Hydroxymethylglutaryl-CoA synthase, cytoplasmic OS=Homo sapiens GN=HMGCS1 PE=1 SV=2	Q01581	Hydroxymethylglutaryl-CoA synthase, cytoplasmic	HMCS1_HUMAN	18.6721	18.8232	18.3379
HMGN5	+	+						+	+	binding;chromatin binding;DNA binding;nucleic acid binding	biological regulation;biosynthetic process;cellular component organization;cellular metabolic process;cellular nitrogen compound metabolic process;cellular process;chromatin modification;chromatin organization;chromosome organization;macromolecule metabolic process;metabolic process;nitrogen compound metabolic process;nucleobase-containing compound metabolic process;organelle organization;primary…	cell part;intracellular membrane-bounded organelle;intracellular non-membrane-bounded organelle;intracellular organelle;nucleolus;nucleoplasm;nucleus;organelle	Chromatinregulator;Completeproteome;DNA-binding;Nucleus;Phosphoprotein;Referenceproteome;Transcription;Transcriptionregulation	7	3.8956	0.00224096	-2.63456	-2.2324	2.83795	0.00878621	-2.47113	-1.87703	0.236098	0.86366	0.163431	0.12846	1.74525	0.516143	0.867174	0.676347	1.349	0.199517	0.948889	0.714061	5.13659	0.038129	-2.55284	-2.09736	1.99903	0.00815094	-1.68567	-1.23369	>sp|P82970|HMGN5_HUMAN High mobility group nucleosome-binding domain-containing protein 5 OS=Homo sapiens GN=HMGN5 PE=1 SV=1	P82970	High mobility group nucleosome-binding domain-containing protein 5	HMGN5_HUMAN	15.0324	14.8102	14.4456
HNRNPA1	+	+						+	+	binding;DNA binding;nucleic acid binding;nucleotide binding;RNA binding;single-stranded DNA binding;single-stranded RNA binding;structure-specific DNA binding	cellular metabolic process;cellular nitrogen compound metabolic process;cellular process;establishment of localization;macromolecule metabolic process;metabolic process;mRNA metabolic process;mRNA processing;nitrogen compound metabolic process;nuclear transport;nucleobase-containing compound metabolic process;nucleobase-containing compound transport;nucleocytoplasmic transport;primary metabolic p…	cell part;cytoplasm;cytoskeleton;extracellular organelle;intracellular non-membrane-bounded organelle;intracellular organelle;macromolecular complex;membrane;nucleoplasm;organelle;ribonucleoprotein complex;spliceosomal complex;vesicle	3D-structure;Acetylation;Alternativesplicing;Amyotrophiclateralsclerosis;Completeproteome;Cytoplasm;Directproteinsequencing;Diseasemutation;Host-virusinteraction;Isopeptidebond;Methylation;mRNAprocessing;mRNAsplicing;mRNAtransport;Neurodegeneration;Nucleus;Phosphoprotein;Polymorphism;Referenceproteome;Repeat;Ribonucleoprotein;RNA-binding;Spliceosome;Transport;Ublconjugation	9	3.24357	0.0160722	-1.21475	-1.0827	3.03552	0.0411609	-1.24449	-1.09024	0.0588684	0.981819	-0.0297375	-0.0253109	1.53799	0.679681	-0.385982	-0.338302	1.12132	0.48863	-0.400851	-0.343161	4.76722	0.0831987	-1.22962	-1.099	3.57894	0.00626526	-1.6156	-1.42593	>sp|P09651|ROA1_HUMAN Heterogeneous nuclear ribonucleoprotein A1 OS=Homo sapiens GN=HNRNPA1 PE=1 SV=5	P09651	Heterogeneous nuclear ribonucleoprotein A1	ROA1_HUMAN	21.6509	21.5566	21.491
HNRNPAB	+	+						+	+	binding;mRNA binding;nucleic acid binding;nucleotide binding;RNA binding	anatomical structure morphogenesis;biological regulation;cell morphogenesis;cellular component morphogenesis;cellular component organization;cellular process;developmental process	cell part;cytoplasm;intracellular membrane-bounded organelle;intracellular organelle;macromolecular complex;nucleoplasm;nucleus;organelle;ribonucleoprotein complex	3D-structure;Acetylation;Alternativesplicing;Completeproteome;Cytoplasm;Directproteinsequencing;Methylation;Nucleus;Phosphoprotein;Referenceproteome;Repeat;RNA-binding	8	5.00569	0.00254167	-2.00001	-1.86606	3.18994	0.0135854	-1.87662	-1.57102	0.241304	0.893276	0.123381	0.102675	1.47601	0.683896	0.379581	0.331867	2.12924	0.417434	0.441271	0.405566	5.61896	0.029225	-1.93831	-1.7005	4.61391	0.00603175	-1.55873	-1.45651	>sp|Q99729|ROAA_HUMAN Heterogeneous nuclear ribonucleoprotein A/B OS=Homo sapiens GN=HNRNPAB PE=1 SV=2	Q99729	Heterogeneous nuclear ribonucleoprotein A/B	ROAA_HUMAN	19.4867	19.5239	19.4081
HNRNPH1	+	+						+	+	binding;nucleic acid binding;nucleotide binding;poly(U) RNA binding;poly-pyrimidine tract binding;RNA binding;single-stranded RNA binding	biological regulation;cellular metabolic process;cellular nitrogen compound metabolic process;cellular process;macromolecule metabolic process;metabolic process;mRNA metabolic process;mRNA processing;nitrogen compound metabolic process;nucleobase-containing compound metabolic process;primary metabolic process;RNA metabolic process;RNA processing;RNA splicing	cell part;intracellular membrane-bounded organelle;intracellular organelle;macromolecular complex;membrane;nucleoplasm;nucleus;organelle;ribonucleoprotein complex;spliceosomal complex	3D-structure;Acetylation;Completeproteome;Directproteinsequencing;Methylation;mRNAprocessing;mRNAsplicing;Nucleus;Phosphoprotein;Referenceproteome;Repeat;Ribonucleoprotein;RNA-binding;Spliceosome	11	4.3564	0.0111546	-1.24757	-1.17118	3.45572	0.0494936	-1.14149	-1.03671	0.404155	0.900304	0.106086	0.095465	2.49968	0.661265	-0.40176	-0.368131	1.80299	0.518707	-0.348717	-0.320943	5.71518	0.0827053	-1.19453	-1.10256	4.58764	0.00608153	-1.59629	-1.48772	>sp|P31943|HNRH1_HUMAN Heterogeneous nuclear ribonucleoprotein H OS=Homo sapiens GN=HNRNPH1 PE=1 SV=4	P31943	Heterogeneous nuclear ribonucleoprotein H	HNRH1_HUMAN	20.7048	20.8146	20.7787
HNRNPL	+	+						+	+	binding;DNA binding;nucleic acid binding;nucleotide binding;regulatory region DNA binding;regulatory region nucleic acid binding;RNA binding;transcription regulatory region DNA binding	cellular metabolic process;cellular nitrogen compound metabolic process;cellular process;macromolecule metabolic process;metabolic process;mRNA metabolic process;mRNA processing;nitrogen compound metabolic process;nucleobase-containing compound metabolic process;primary metabolic process;RNA metabolic process;RNA processing;RNA splicing	cell part;cytoplasm;extracellular organelle;intracellular membrane-bounded organelle;intracellular organelle;macromolecular complex;membrane;nucleoplasm;nucleus;organelle;ribonucleoprotein complex;vesicle	3D-structure;Acetylation;Alternativesplicing;Completeproteome;Cytoplasm;Directproteinsequencing;Nucleus;Phosphoprotein;Referenceproteome;Repeat;Ribonucleoprotein;RNA-binding	24	3.66215	0.00855429	-1.49316	-1.33668	3.68013	0.0324723	-1.27888	-1.16345	0.719459	0.785735	0.21428	0.188592	0.319643	0.896194	-0.117735	-0.101718	0.0178175	0.990037	-0.0105953	-0.00884731	5.13257	0.0554	-1.38602	-1.23965	3.00478	0.00814935	-1.50376	-1.28072	>sp|P14866|HNRPL_HUMAN Heterogeneous nuclear ribonucleoprotein L OS=Homo sapiens GN=HNRNPL PE=1 SV=2	P14866	Heterogeneous nuclear ribonucleoprotein L	HNRPL_HUMAN	22.3265	22.3797	22.4957
HP1BP3	+	+						+		binding;chromatin binding;DNA binding;nucleic acid binding;nucleosome binding	biological regulation;cellular component assembly;cellular component organization;cellular macromolecular complex assembly;cellular process;chromatin organization;chromosome organization;macromolecular complex assembly;organelle organization;response to chemical stimulus;response to stimulus;response to stress	cell part;chromosome;intracellular membrane-bounded organelle;intracellular non-membrane-bounded organelle;intracellular organelle;macromolecular complex;nucleosome;nucleus;organelle	3D-structure;Acetylation;Alternativesplicing;Chromosome;Completeproteome;Directproteinsequencing;DNA-binding;Nucleus;Phosphoprotein;Referenceproteome;Repeat	13	2.90336	0.00986025	1.44808	1.22899	4.00814	0.00804545	2.20651	1.93337	1.65524	0.353382	0.758426	0.627415	2.76489	0.326444	-1.47097	-1.13228	2.10321	0.120638	-1.09176	-0.89375	3.42626	0.0377558	1.8273	1.42041	1.04958	0.471247	0.356327	0.307311	>sp|Q5SSJ5|HP1B3_HUMAN Heterochromatin protein 1-binding protein 3 OS=Homo sapiens GN=HP1BP3 PE=1 SV=1	Q5SSJ5	Heterochromatin protein 1-binding protein 3	HP1B3_HUMAN	18.6783	18.6703	18.4831
HPCAL1	+	+						+		binding;calcium ion binding;cation binding;ion binding;metal ion binding	biological regulation;cellular process;response to stimulus;signal transduction	extracellular organelle;organelle;vesicle	Calcium;Completeproteome;Lipoprotein;Metal-binding;Myristate;Referenceproteome;Repeat	3	1.34872	0.0285324	1.35281	0.920934	2.21221	0.0143004	2.19836	1.55286	0.651281	0.425428	0.845551	0.532774	1.91846	0.322905	-1.64882	-1.10618	1.19144	0.145381	-1.22604	-0.826323	2.09644	0.0628008	1.77559	1.19619	0.19531	0.852073	0.126774	0.101478	>sp|P37235|HPCL1_HUMAN Hippocalcin-like protein 1 OS=Homo sapiens GN=HPCAL1 PE=1 SV=3	P37235	Hippocalcin-like protein 1	HPCL1_HUMAN	14.6266	14.8544	15.1616
HSBP1	+	+						+	+	protein binding transcription factor activity;transcription cofactor activity;transcription corepressor activity;transcription factor binding transcription factor activity	biological regulation;cell differentiation;cellular process;developmental process;multicellular organismal process;muscle contraction;response to abiotic stimulus;response to heat;response to stimulus;response to stress	cell part;cytoskeleton;intracellular membrane-bounded organelle;intracellular non-membrane-bounded organelle;intracellular organelle;nucleoplasm;nucleus;organelle	3D-structure;Completeproteome;Nucleus;Referenceproteome	2	1.83897	0.0182169	-1.41061	-1.0515	1.73961	0.0336639	-1.65004	-1.15553	0.286033	0.798788	-0.239425	-0.178972	0.645851	0.696607	0.403812	0.309623	0.354158	0.660608	0.284099	0.213029	2.79047	0.0673503	-1.53032	-1.17002	1.24551	0.0604839	-1.12651	-0.790723	>sp|O75506|HSBP1_HUMAN Heat shock factor-binding protein 1 OS=Homo sapiens GN=HSBP1 PE=1 SV=1	O75506	Heat shock factor-binding protein 1	HSBP1_HUMAN	11.7343	12.4411	12.7665
HSD17B4	+	+						+		3alpha,7alpha,12alpha-trihydroxy-5beta-cholest-24-enoyl-CoA hydratase activity;3-hydroxyacyl-CoA dehydrogenase activity;binding;carbon-oxygen lyase activity;catalytic activity;hydro-lyase activity;identical protein binding;isomerase activity;long-chain-enoyl-CoA hydratase activity;lyase activity;oxidoreductase activity;oxidoreductase activity, acting on CH-OH group of donors;oxidoreductase activi…	anatomical structure development;biological regulation;biosynthetic process;catabolic process;cell development;cell differentiation;cellular ketone metabolic process;cellular lipid metabolic process;cellular metabolic process;cellular process;developmental process;hormone metabolic process;lipid metabolic process;metabolic process;organic acid metabolic process;primary metabolic process;small mol…	cell part;intracellular membrane-bounded organelle;intracellular organelle;membrane;microbody;mitochondrion;organelle;peroxisome	3D-structure;Acetylation;Alternativesplicing;Completeproteome;Deafness;Directproteinsequencing;Diseasemutation;Fattyacidmetabolism;Isomerase;Lipidmetabolism;Lyase;NAD;Oxidoreductase;Peroxisome;Phosphoprotein;Polymorphism;Referenceproteome	32	2.86751	0.0180444	-1.21253	-1.05205	4.39034	0.0492716	-1.10083	-1.04203	0.27622	0.900854	0.111709	0.0961005	1.63735	0.61605	0.523209	0.443196	1.02928	0.368655	0.579063	0.458059	4.74907	0.0974551	-1.15668	-1.0397	1.37052	0.186341	-0.633471	-0.521013	>sp|P51659|DHB4_HUMAN Peroxisomal multifunctional enzyme type 2 OS=Homo sapiens GN=HSD17B4 PE=1 SV=3	P51659	Peroxisomal multifunctional enzyme type 2	DHB4_HUMAN	20.294	20.2811	20.302
HSP90AB1	+	+						+	+	adenyl nucleotide binding;adenyl ribonucleotide binding;antigen binding;ATP binding;binding;double-stranded RNA binding;enzyme binding;enzyme regulator activity;kinase binding;MHC class II protein complex binding;MHC protein complex binding;nitric-oxide synthase regulator activity;nucleic acid binding;nucleotide binding;protein binding;protein domain specific binding;purine nucleotide binding;pur…	anatomical structure development;biological regulation;cellular metabolic process;cellular process;developmental process;immune system process;locomotion;macromolecule metabolic process;metabolic process;primary metabolic process;protein folding;protein metabolic process;response to abiotic stimulus;response to chemical stimulus;response to external stimulus;response to heat;response to stimulus;…	cell part;cytoplasm;cytoplasmic membrane-bounded vesicle;cytosol;extracellular organelle;intracellular membrane-bounded organelle;intracellular organelle;membrane;mitochondrion;nucleoplasm;organelle;vesicle	3D-structure;Acetylation;ATP-binding;Chaperone;Completeproteome;Cytoplasm;Directproteinsequencing;Glycoprotein;Nucleotide-binding;Phosphoprotein;Polymorphism;Referenceproteome;S-nitrosylation;Stressresponse;Ublconjugation	18	3.27857	0.0154681	-1.21607	-1.08618	3.46339	0.013872	-1.80901	-1.56024	1.51634	0.460789	-0.592943	-0.502201	1.35939	0.591778	0.607122	0.486793	0.792128	0.587461	0.310651	0.263023	3.50014	0.0574139	-1.51254	-1.2291	2.31932	0.0638359	-0.905416	-0.78061	>sp|P08238|HS90B_HUMAN Heat shock protein HSP 90-beta OS=Homo sapiens GN=HSP90AB1 PE=1 SV=4	P08238	Heat shock protein HSP 90-beta	HS90B_HUMAN	23.4684	23.4431	23.2787
HSPA4	+	+						+		adenyl nucleotide binding;adenyl ribonucleotide binding;ATP binding;binding;nucleotide binding;purine nucleotide binding;purine ribonucleoside triphosphate binding;purine ribonucleotide binding;ribonucleotide binding	cellular component assembly;cellular component organization;cellular macromolecular complex assembly;cellular membrane organization;cellular process;establishment of localization;macromolecular complex assembly;membrane organization;mitochondrion organization;organelle organization;protein complex assembly;protein targeting;protein transport;response to chemical stimulus;response to stimulus;resp…	cell part;cytosol;extracellular organelle;intracellular membrane-bounded organelle;intracellular organelle;mitochondrion;organelle;vesicle	Acetylation;Alternativesplicing;ATP-binding;Completeproteome;Cytoplasm;Directproteinsequencing;Nucleotide-binding;Phosphoprotein;Referenceproteome;Stressresponse	49	4.34956	0.0202596	-1.06968	-1.01282	4.4389	0.0348542	-1.21461	-1.14529	1.16406	0.852905	-0.144931	-0.136915	4.57334	0.456288	0.85855	0.788529	2.7576	0.197596	0.786085	0.71092	6.2464	0.0899466	-1.14215	-1.07076	1.24627	0.56698	-0.283598	-0.256223	>sp|P34932|HSP74_HUMAN Heat shock 70 kDa protein 4 OS=Homo sapiens GN=HSPA4 PE=1 SV=4	P34932	Heat shock 70 kDa protein 4	HSP74_HUMAN	22.2842	22.3628	22.4265
HSPB1	+	+	+					+	+	binding;enzyme binding;enzyme inhibitor activity;enzyme regulator activity;identical protein binding;kinase binding;kinase inhibitor activity;kinase regulator activity;protein binding;protein kinase binding;protein kinase C binding;protein kinase C inhibitor activity;protein kinase inhibitor activity;protein kinase regulator activity;protein serine/threonine kinase inhibitor activity;small conjug…	biological adhesion;biological regulation;cell adhesion;cellular component movement;cellular process;homeostatic process;macromolecule metabolic process;metabolic process;multi-organism process;regulation of protein modification process;regulation of translation;response to biotic stimulus;response to chemical stimulus;response to stimulus;response to stress;signal transduction	cell part;cytoplasm;cytoskeleton;cytosol;extracellular organelle;extracellular space;intracellular membrane-bounded organelle;intracellular non-membrane-bounded organelle;intracellular organelle;macromolecular complex;membrane;nucleus;organelle;plasma membrane;proteasome complex;protein complex;vesicle	3D-structure;Acetylation;Chaperone;Charcot-Marie-Toothdisease;Completeproteome;Cytoplasm;Cytoskeleton;Directproteinsequencing;Diseasemutation;Neurodegeneration;Neuropathy;Nucleus;Phosphoprotein;Referenceproteome;Stressresponse	16	4.56992	0.00652632	3.67409	3.14106	1.48637	0.0707426	1.32449	0.937498	2.26764	0.0212041	-2.3496	-1.64448	0.105547	0.862786	0.257882	0.135273	0.681552	0.280128	-0.916918	-0.568954	1.72797	0.0396588	2.49929	1.37269	1.99591	0.003168	2.75717	1.72271	>sp|P04792|HSPB1_HUMAN Heat shock protein beta-1 OS=Homo sapiens GN=HSPB1 PE=1 SV=2	P04792	Heat shock protein beta-1	HSPB1_HUMAN	23.4984	23.434	23.2095
HSPB6	+	+						+	+	binding;identical protein binding;protein binding;protein dimerization activity;protein homodimerization activity;structural constituent of eye lens;structural molecule activity	biological regulation	cell part;cytoplasm;intracellular membrane-bounded organelle;intracellular organelle;nucleus;organelle	3D-structure;Completeproteome;Cytoplasm;Directproteinsequencing;Nucleus;Phosphoprotein;Referenceproteome;Stressresponse	9	1.44163	0.0137332	1.76499	1.12485	2.97886	0.0426136	1.23128	1.07551	0.384508	0.634013	-0.533711	-0.336914	0.437839	0.69749	0.445254	0.30506	0.101006	0.838829	0.178399	0.109154	2.03276	0.0950288	1.49813	1.05403	2.6067	0.00576982	1.94339	1.51032	>sp|O14558|HSPB6_HUMAN Heat shock protein beta-6 OS=Homo sapiens GN=HSPB6 PE=1 SV=2	O14558	Heat shock protein beta-6	HSPB6_HUMAN	19.7398	19.6971	19.5957
HSPD1	+	+						+	+	adenyl nucleotide binding;adenyl ribonucleotide binding;ATP binding;ATPase activity;binding;catalytic activity;chaperone binding;DNA binding;DNA replication origin binding;double-stranded RNA binding;enzyme binding;hydrolase activity;hydrolase activity, acting on acid anhydrides;hydrolase activity, acting on acid anhydrides, in phosphorus-containing anhydrides;lipopolysaccharide binding;nucleic a…	biological regulation;cell activation;cell proliferation;cellular component assembly;cellular component organization;cellular macromolecular complex assembly;cellular metabolic process;cellular nitrogen compound metabolic process;cellular process;cytokine production;DNA metabolic process;DNA recombination;immune system process;macromolecular complex assembly;macromolecule metabolic process;metabo…	cell part;cell surface;cytoplasm;cytoplasmic membrane-bounded vesicle;cytosol;endosome;extracellular organelle;extracellular space;intracellular membrane-bounded organelle;intracellular organelle;macromolecular complex;membrane;mitochondrion;organelle;plasma membrane;protein complex;receptor complex;vesicle	Acetylation;Alternativesplicing;ATP-binding;Chaperone;Completeproteome;Directproteinsequencing;Diseasemutation;Hereditaryspasticparaplegia;Host-virusinteraction;Leukodystrophy;Mitochondrion;Neurodegeneration;Nucleotide-binding;Phosphoprotein;Referenceproteome;Transitpeptide	39	2.83095	0.00632541	-1.83412	-1.48401	3.47323	0.0113964	-2.01802	-1.71479	0.268329	0.844718	-0.183906	-0.144334	0.807755	0.712965	0.346229	0.284342	0.38673	0.682756	0.254276	0.199132	4.62191	0.0316596	-1.92607	-1.61063	3.02201	0.00721429	-1.57984	-1.33763	>sp|P10809|CH60_HUMAN 60 kDa heat shock protein, mitochondrial OS=Homo sapiens GN=HSPD1 PE=1 SV=2	P10809	60 kDa heat shock protein, mitochondrial	CH60_HUMAN	23.6024	23.4798	23.3371
[truncated: 3,611 more rows]
[truncated: 9 more columns]
